# Supplementary material for: Beyond large-effect loci: large-scale GWAS reveals a mixed large-effect and polygenic architecture for age at maturity of Atlantic salmon
Source: Genet Sel Evol. 2020 Feb 12;52:9. doi: 10.1186/s12711-020-0529-8 (PMC7017552; doi:10.1186/s12711-020-0529-8)
Supplement: Supplementary file 1 — Additional file 1: Table S1. Mean discordance between imputed and actual genotypes per chromosome. Table S2. List of the 120 candidate genes tagged by the 116 significant SNPs identified with conditional and joint analysis. The P-value indicates significance of the association test performed in BOLT-LMM using a non-infinitesimal model. P-value (COJO) indicates the significance of the SNP after conditional and joint analysis. Beta and its corresponding standard error (Beta_SE) were estimated using BOLT-LMM and indicate the effect size of the minor allele. The odds ratio (OR) and its corresponding transformed standard error (SE_T) were calculated using LMOR. Table S3. List of all 512,397 SNPs in the final dataset. Output statistics from BOLT-LMM (p-value, Beta & Beta_SE) and LMOR (OR, log(OR) & SE_T) are listed. The p-value indicates significance of the association test performed in BOLT-LMM using a non-infinitesimal model. Beta and its corresponding standard error (Beta_SE) were estimated using BOLT-LMM and indicate the effect size of the minor allele. The odds ratio (OR) and its corresponding transformed standard error (SE_T) were calculated using LMOR. Table S4. Estimated heritabilities from GCTA using the 50K array dataset. Estimates are given on the observed quantitative scale and when transformed on the liability scale assuming population prevalences of 1%, 2.5% and 5%. [file 12711_2020_529_MOESM1_ESM.xlsx]

## Sheet: Table S1
Table S1. The mean discordance between imputed and actual genotypes per chromosome.
Chromosome	Discordance
1	0.227284
2	0.227081
3	0.230458
4	0.220282
5	0.227855
6	0.235132
7	0.229376
8	0.217113
9	0.218872
10	0.22351
11	0.234978
12	0.222938
13	0.228589
14	0.229751
15	0.24107
16	0.234766
17	0.222089
18	0.239299
19	0.219077
20	0.221671
21	0.212857
22	0.23134
23	0.217436
24	0.236557
25	0.237893
26	0.237603
27	0.230043
28	0.226199
29	0.228608

## Sheet: Table S2
Table S2. List of the 120 candidate genes tagged by the 116 significant SNPs identified with conditional and joint analysis. The p-value indicates significance of the association test performed in BOLT-LMM using a non-infinitesimal model. P-value (COJO) indicates the significance of the SNP after conditional and joint analysis. Beta and its corresponding standard error (Beta_SE) were estimated us…
SNP	Chr	BP	NCBI ID	NCBI Description	Allele 1	Allele 2	Allele 1 Freq	P-value	P-value (COJO)	Beta	Beta_SE	OR	log(OR)	SE_T	Functional annotation
ctg7180001918306_1490_SCT	1	43169029	LOC106603085	type II iodothyronine deiodinase-like	T	C	0.103484	8.7e-12	6.0911e-08	0.0351869	0.00660706	1.24431	0.218583	0.0410434	intergenic_region
ctg7180001867929_8508_SAC	1	48740644	phs	Pterin-4-alpha-carbinolamine dehydratase	C	A	0.142934	1.6e-06	1.34342e-16	-0.0630659	0.00775953	0.629947	-0.462119	0.0568584	missense_variant
ctg7180001844155_782_SCT	1	55800570	calhm3	calcium homeostasis modulator 3	C	T	0.151979	1.1e-16	1.58715e-11	-0.0372348	0.00560695	0.772217	-0.25849	0.0389244	synonymous_variant
ctg7180001878324_2072_SGT	1	65880873	LOC106607716	protein FAM13C-like	G	T	0.226536	7.9e-10	7.93328e-09	-0.0391131	0.00676895	0.764116	-0.269036	0.0465596	5_prime_UTR_variant
ctg7180001292996_4886_SAC	1	82470940	LOC106610932	oligodendrocyte transcription factor 3-like	A	C	0.324109	4.1e-05	1.67537e-08	-0.0342552	0.00607495	0.794011	-0.230657	0.0409057	downstream_gene_variant
ctg7180001788922_1095_SGT	1	99050426	LOC106611671	calcium-activated potassium channel subunit alpha-1-like	G	T	0.145397	9.1e-15	1.15156e-09	-0.0510392	0.00837092	0.694678	-0.364307	0.0597499	intron_variant
ctg7180001885553_779_SAG	1	117220537	LOC106563476	tankyrase-1-like	A	G	0.147143	1.6e-17	4.92177e-11	-0.0373692	0.00568222	0.77129	-0.259691	0.0394876	intron_variant
ctg7180001901381_10380_SAG	1	135779433	scamp1	secretory carrier membrane protein 1	G	A	0.365888	0.0004	3.52756e-23	-0.0414544	0.00419145	0.756418	-0.279162	0.028226	missense_variant
ctg7180001915043_20784_SCT	1	146654949	ptpa	protein phosphatase 2 phosphatase activator	T	C	0.0741089	1.7e-10	5.62489e-10	-0.0281968	0.00786203	0.82326	-0.194483	0.054227	intron_variant
ctg7180001883153_1996_SCT	1	146686916	LOC106570862	carnitine O-acetyltransferase-like	C	T	0.395352	0.0009	8.9608e-38	-0.0486266	0.0041196	0.720642	-0.327612	0.027755	missense_variant
ctg7180001900729_1904	3	9598373	LOC106598444	leptin receptor gene-related protein	A	C	0.318019	3.3e-11	9.99053e-15	-0.0479681	0.00617872	0.72025	-0.328156	0.0422695	3_prime_UTR_variant
ctg7180001808007_9447_SAG	3	40081000	LOC106600468	DNA ligase 1-like	A	G	0.169936	3.3e-75	8.51367e-22	0.0706562	0.00728355	1.53476	0.428372	0.0441584	intron_variant
ctg7180001209078_7676_SCT	4	17078565	LOC106602561	sorbin and SH3 domain-containing protein 2-like	C	T	0.248925	0.043	3.32664e-81	-0.00648654	0.00662562	0.958192	-0.0427068	0.0436224	intergenic_region
ctg7180001434929_15359_SGT	4	18088183	LOC106602634	uncharacterized LOC106602634	G	T	0.410622	0.0013	7.15335e-117	0.0355966	0.00564912	1.25962	0.230814	0.0366298	intergenic_region
ctg7180001916696_7245_SAG	4	23932201	LOC106602724	EF-hand calcium-binding domain-containing protein 6-like	A	G	0.152382	5.2e-05	1.17557e-09	0.0217542	0.00561418	1.14823	0.138223	0.0356716	intron_variant
ctg7180001901285_17158	4	24015545	acsl1	acyl-CoA synthetase long-chain family member 1	G	A	0.39683	0.085	3.42554e-09	-0.0427929	0.0041155	0.750579	-0.286911	0.0275929	3_prime_UTR_variant
ctg7180001846072_20696_SAG	4	27680541	LOC106602846	beta-galactoside alpha-2,6-sialyltransferase 1-like	A	G	0.389441	0.44	6.01805e-104	0.00372625	0.00593147	1.02463	0.0243271	0.0387241	intron_variant
ctg7180001865937_2343_SCT	4	32655596	LOC106602938	NADH dehydrogenase [ubiquinone] 1 alpha subcomplex subunit 2-like	T	C	0.186145	0.87	5.01239e-70	0.00258009	0.00721621	1.01696	0.0168167	0.0470343	downstream_gene_variant
ctg7180001931765_153_SAG	4	33137236	LOC106602949	protein CXorf40A-like	A	G	0.161472	6.2e-17	2.6169e-106	0.0711865	0.00801621	1.53788	0.430403	0.0484671	upstream_gene_variant
ctg7180001749913_1895_SCT	4	33145313	atg4a	ATG4 autophagy related 4 homolog A (S. cerevisiae)	C	T	0.217491	0.89	4.17531e-60	-0.00189185	0.00679721	0.987678	-0.0123984	0.044546	upstream_gene_variant
ctg7180001906374_13326_SAC	4	47517334	LOC106603569	solute carrier organic anion transporter family member 2B1-like	A	C	0.0176876	1.8e-45	8.92277e-30	-0.234267	0.021775				missense_variant
ctg7180001430610_1526_SAG	4	48500768	LOC106603552	nuclear receptor-interacting protein 1-like	G	A	0.096364	0.00015	2.50069e-99	-0.0281705	0.00970725	0.82385	-0.193767	0.06677	intron_variant
ctg7180001496783_1076_SCT	4	48618292	LOC106603548	uncharacterized LOC106603548	T	C	0.240283	0.48	2.5914e-111	0.00513481	0.00670776	1.03396	0.0333993	0.0436305	upstream_gene_variant
ctg7180001496783_1076_SCT	4	48618292	LOC106603550	uncharacterized LOC106603550	T	C	0.240283	0.48	2.5914e-111	0.00513481	0.00670776	1.03396	0.0333993	0.0436305	upstream_gene_variant
ctg7180001223575_601_SAC	4	55772228	LOC106603415	biotin--protein ligase-like	A	C	0.0248075	0.47	2.97702e-13	-0.00453801	0.0137577	0.970503	-0.0299403	0.0907689	intron_variant
ctg7180001848920_2818_SCT	4	56347270	LOC106603634	uncharacterized protein C11orf87 homolog	T	C	0.240149	0.17	1.59158e-79	-0.00554168	0.00672799	0.9642	-0.0364562	0.0442604	5_prime_UTR_variant
ctg7180001937336_11325_SGT	4	58436192	LOC106603677	rho GTPase-activating protein 32-like	T	G	0.0334945	0.11	1.35132e-144	0.0232564	0.0159529	1.15708	0.145898	0.10008	intron_variant
ctg7180001901646_16601_SAG	4	58628770	LOC106603676	protein turtle homolog B-like	A	G	0.0864678	4.3e-39	1.73584e-218	0.153212	0.00860292	2.32309	0.842898	0.0473291	intron_variant
ctg7180001567595_3391_SAG	4	60054387	opcml	opioid binding protein/cell adhesion molecule like	G	A	0.243686	0.88	1.03799e-52	0.00127231	0.00673766	1.00834	0.00830892	0.0440008	intron_variant
ctg7180001841094_1082_SAC	5	45330860	LOC106605010	phosphatase and actin regulator 4B-like	A	C	0.454997	7.3e-05	2.77254e-08	-0.0210544	0.00576867	0.870721	-0.138434	0.0379293	intron_variant
ctg7180001324181_916_SAC	5	51219765	LOC106605123	protein eva-1 homolog B-like	C	A	0.318064	1.8e-06	1.53056e-15	0.0360781	0.00615093	1.2596	0.230796	0.0393482	intron_variant
ctg7180001897561_751_SAG	5	56790454	LOC106605325	toll-like receptor 2 type-1	A	G	0.0597349	1.7e-07	8.18642e-09	-0.0368863	0.00853892	0.771243	-0.259751	0.0601306	intron_variant
ctg7180001814672_3554_SAC	6	27791960	LOC106606975	Na(+)/H(+) exchange regulatory cofactor NHE-RF1-like	C	A	0.370321	5.3e-11	4.99928e-25	0.0359442	0.00566718	1.26074	0.231697	0.0365307	intron_variant
ctg7180001597738_1122_SGT	6	27968141	LOC106606972	ATP-dependent DNA helicase Q5-like	G	T	0.251702	0.00015	3.28517e-18	-0.0195473	0.00663662	0.877579	-0.130588	0.0443368	intron_variant
ctg7180001597738_1122_SGT	6	27968141	LOC106606978	uncharacterized LOC106606978	G	T	0.251702	0.00015	3.28517e-18	-0.0195473	0.00663662	0.877579	-0.130588	0.0443368	intron_variant
ctg7180001857311_2199_SAG	8	2530631	LOC106609940	protein FRG1-like	A	G	0.0472864	8.1e-28	2.28946e-68	0.217906	0.0122295	3.06658	1.12056	0.0628891	intergenic_region
ctg7180001840898_3579_SAT	9	157967	LOC106610586	mitochondrial basic amino acids transporter-like	T	A	0.256896	1.9e-12	2.10978e-08	0.0256883	0.00457761	1.17843	0.164181	0.0292567	intron_variant
ctg7180001609717_8865_SAG	9	11165066	LOC106610702	membrane-bound O-acyltransferase domain-containing protein 2-like	G	A	0.323079	7.1e-33	9.45362e-22	0.0411766	0.00427839	1.30083	0.263006	0.0273272	intron_variant
ctg7180001898949_10269_SAG	9	22638682	LOC106611044	transmembrane emp24 domain-containing protein 10-like	G	A	0.405427	6.7e-14	5.2156e-18	-0.0373354	0.00592144	0.77959	-0.248987	0.0394896	intron_variant
ctg7180001858747_8283_SAG	9	24886574	six6	SIX homeobox 6	G	A	0.436817	3.2e-77	0	-0.0857285	0.00588448	0.554455	-0.58977	0.0404824	intergenic_region
ctg7180001479018_207_SCT	9	26322116	LOC106610951	neuroblast differentiation-associated protein AHNAK-like	T	C	0.167383	6.5e-15	0	-0.0478196	0.00768092	0.713521	-0.337543	0.0542172	missense_variant
ctg7180001600873_2947_SGT	9	27547181	ypel5	yippee-like 5	G	T	0.052033	6.5e-05	1.62219e-119	0.0380486	0.0129969	1.26328	0.233708	0.0798314	missense_variant
ctg7180001839484_7103_SAG	9	28261849	LOC106611117	gap junction delta-2 protein	G	A	0.17916	0.012	1.02602e-215	0.0285343	0.00756348	1.19766	0.180369	0.0478097	intergenic_region
ctg7180001839640_5192_SAG	9	29976506	LOC106611159	B2 bradykinin receptor-like	A	G	0.361678	0.29	0	0.00345306	0.00611807	1.02279	0.0225374	0.0399314	intergenic_region
ctg7180001890550_2822_SCT	9	33412170	LOC106611209	rho GTPase-activating protein 5-like	T	C	0.100663	0.00036	9.60239e-35	-0.0258673	0.00964514	0.837741	-0.177046	0.0660151	downstream_gene_variant
ctg7180001903379_37638_SCT	9	35060814	LOC106611243	F-box only protein 34-like	C	T	0.286539	1.9e-48	0	-0.0733646	0.00628398	0.592072	-0.524126	0.0448936	upstream_gene_variant
ctg7180001802554_4422_SCT	9	51853181	ocrl	OCRL, inositol polyphosphate-5-phosphatase	T	C	0.119201	5.1e-33	1.90715e-13	-0.0555633	0.00620389	0.668319	-0.402989	0.0449955	3_prime_UTR_variant
ctg7180001803149_1458_SAG	9	52478459	LOC106611537	GPI ethanolamine phosphate transferase 2-like	G	A	0.200788	2.3e-35	9.97385e-21	0.0778315	0.00725833	1.6056	0.473498	0.044157	intergenic_region
ctg7180001910702_4012_SAG	9	63974812	LOC106611736	transcription factor Sox-3	A	G	0.230521	7.2e-15	2.14198e-13	-0.0407372	0.00683109	0.755261	-0.280692	0.0470684	missense_variant
ctg7180001547849_1544_SAG	9	73300175	LOC106611993	SLIT and NTRK-like protein 2	A	G	0.383486	1.4e-06	5.44538e-09	0.0232746	0.00591382	1.16279	0.150819	0.0383216	synonymous_variant
ctg7180001927314_7159_SGT	9	96627094	LOC106612445	transmembrane protein 120A-like	T	G	0.0509135	5.8e-11	8.31095e-08	-0.0698156	0.012996	0.585156	-0.535876	0.099752	missense_variant
ctg7180001353547_1063	9	106704957	pid1	phosphotyrosine interaction domain containing 1	G	A	0.0681533	5.9e-09	8.35299e-18	-0.0965667	0.0112037	0.448885	-0.800989	0.092931	3_prime_UTR_variant
ctg7180001327291_1939_SAG	9	121905671	LOC106613053	uncharacterized LOC106613053	G	A	0.0107469	1.5e-14	2.51328e-09	-0.164964	0.0275744	0.108843	-2.21784	0.370722	downstream_gene_variant
ctg7180001833829_7994_SCT	9	133487741	LOC106613255	translocon-associated protein subunit gamma	T	C	0.413263	0.04	1.98154e-13	0.0300617	0.00569943	1.21547	0.19513	0.0369949	intron_variant
ctg7180001901392_4323_SAG	9	137361998	scaf4	SR-related CTD associated factor 4	G	A	0.488895	1e-11	2.1193e-14	0.0329936	0.00578233	1.24144	0.21627	0.0379026	upstream_gene_variant
ctg7180001476012_5761_SAG	10	25507081	LOC106613903	torsin-1A-like	A	G	0.0199266	0.00023	2.40824e-08	0.117723	0.0204863	1.91061	0.647422	0.112665	5_prime_UTR_variant
ctg7180001877874_4368_SAG	10	29746855	LOC100194696	proteasome subunit beta type-5	G	A	0.0609439	2.6e-07	2.00847e-16	-0.10111	0.0120738	0.424908	-0.855882	0.102203	missense_variant
ctg7180001321164_3188_SCT	10	76268007	LOC106560912	actin-binding protein anillin-like	T	C	0.0356439	4e-06	4.17865e-38	0.124714	0.0157197	1.98468	0.68546	0.0863995	intron_variant
ctg7180001321164_6501_SAG	10	76271320	LOC106560912	actin-binding protein anillin-like	A	G	0.0248522	0.76	2.17777e-24	0.00742398	0.0186108	1.04903	0.0478682	0.119998	splice_region_variant&intron_variant
ctg7180001590764_2613_SAG	10	100959594	mppd2	Metallophosphoesterase domain-containing protein 2	G	A	0.363828	0.32	3.30227e-17	-0.03529	0.00420385	0.789406	-0.236474	0.0281695	missense_variant
ctg7180001833944_3022_SCT	11	40423088	LOC106562713	endophilin-A3-like	C	T	0.036226	9.4e-14	1.0146e-09	0.0664228	0.0108458	1.47818	0.39081	0.0638132	intron_variant
ctg7180001838731_2117_SAG	12	38279792	LOC106565279	N-terminal EF-hand calcium-binding protein 1-like	A	G	0.363872	0.35	9.92377e-17	-0.0347427	0.00420404	0.792392	-0.232699	0.0281577	intron_variant
ctg7180001182299_2608	12	50086806	LOC106565354	saxiphilin-like	G	A	0.0731685	1.1e-05	1.04024e-08	0.0638028	0.0111532	1.46237	0.380055	0.0664365	upstream_gene_variant
ctg7180001840820_28535_SAG	13	10522788	LOC106566502	metabotropic glutamate receptor 6-like	A	G	0.278121	1.4e-12	3.87355e-08	-0.0268483	0.00450257	0.834917	-0.180422	0.0302576	intron_variant
ctg7180001822325_511_SCT	13	11159763	LOC106566519	ERC protein 2-like	C	T	0.202624	9.9e-09	1.19864e-10	0.0422644	0.00715162	1.3027	0.264442	0.0447465	intergenic_region
ctg7180001801848_13119_SAC	13	20891378	LOC106566728	nuclear receptor coactivator 3-like	A	C	0.106394	6e-06	5.34495e-11	0.0446224	0.00948819	1.31523	0.274008	0.0582632	intron_variant
ctg7180001362065_1812_SAG	13	23839167	LOC106566890	plexin-A1-like	A	G	0.189728	4.9e-09	4.46961e-11	0.0411249	0.00733583	1.2931	0.257039	0.0458504	intron_variant
ctg7180001848917_224_SAG	13	34707581	LOC106567043	rho guanine nucleotide exchange factor 25-like	G	A	0.295047	2.9e-10	4.48679e-12	0.0306418	0.00442118	1.21653	0.195999	0.0282798	intron_variant
ctg7180001857952_928_SAG	13	50640265	LOC106567439	RING finger protein 145-like	A	G	0.483253	2e-13	2.63962e-11	-0.0382244	0.00571524	0.777295	-0.251936	0.0376689	3_prime_UTR_variant
ctg7180001193218_3384_SAC	13	64091601	LOC106567659	opioid-binding protein/cell adhesion molecule homolog	A	C	0.188743	8.1e-14	1.12739e-16	0.0617736	0.00740793	1.46093	0.379076	0.0454591	intron_variant
ctg7180001914400_16882	13	79150200	fa76b	FAM76B	A	G	0.237238	2.3e-13	3.02976e-12	0.0475137	0.00678066	1.34695	0.297843	0.0425051	3_prime_UTR_variant
ctg7180001535844_941_SGT	13	92025318	metk1	S-adenosylmethionine synthetase isoform type-1	T	G	0.358409	9.1e-09	1.11611e-08	0.0345959	0.00604081	1.24947	0.222719	0.0388891	intron_variant
ctg7180001535844_941_SGT	13	92025318	LOC106568331	uncharacterized LOC106568331	T	G	0.358409	9.1e-09	1.11611e-08	0.0345959	0.00604081	1.24947	0.222719	0.0388891	intron_variant
ctg7180001513703_1006_SAG	13	102745501	LOC106568538	cingulin-like protein 1	G	A	0.393068	2.6e-10	8.10781e-08	-0.0321113	0.00597351	0.807532	-0.213773	0.0397671	intergenic_region
ctg7180001801349_9699_SAG	14	17051478	LOC106568853	glypican-5-like	G	A	0.221476	7.1e-06	5.57871e-08	-0.026404	0.00485897	0.836551	-0.178468	0.0328423	intron_variant
ctg7180001745524_7562_SAC	14	27174866	LOC106569180	oxysterol-binding protein-related protein 1-like	A	C	0.253896	8.9e-08	2.64878e-91	-0.0430996	0.00659464	0.743246	-0.296728	0.0454021	intron_variant
ctg7180001799514_2979_SCT	14	34021668	tep1	telomerase associated protein 1	T	C	0.35026	0.095	3.70934e-134	0.00295315	0.0060591	1.01946	0.0192772	0.0395517	intron_variant
ctg7180001809843_52_SCT	14	39715872	LOC106569569	zinc finger E-box-binding homeobox 1-like	T	C	0.0421368	4.8e-06	7.18671e-26	-0.0420726	0.0140605	0.740222	-0.300805	0.100528	intergenic_region
ctg7180001306703_201_SCT	14	43898331	LOC106569685	uncharacterized LOC106569685	C	T	0.360738	5.1e-06	2.04974e-188	-0.0401067	0.00608914	0.763377	-0.270003	0.0409928	intergenic_region
ctg7180001794523_4366	14	53565997	eomes	eomesodermin	T	A	0.490149	0.0015	1.26167e-172	0.020625	0.0058695	1.1445	0.134964	0.0384084	missense_variant
ctg7180001844300_2472_SAG	14	56288754	LOC106570041	uncharacterized LOC106570041	A	G	0.461625	2.2e-11	2.98549e-195	-0.0477136	0.00596547	0.728343	-0.316983	0.0396313	non_coding_exon_variant
ctg7180001830944_3868_SCT	14	66034759	LOC106570240	membrane progestin receptor alpha-B-like	C	T	0.34623	0.94	1.50011e-133	-0.0025877	0.00612035	0.983193	-0.0169494	0.0400883	upstream_gene_variant
ctg7180001914949_8635_SCT	14	66862706	LOC106570256	serine incorporator 1-like	C	T	0.302794	7.6e-09	3.79586e-93	-0.0415888	0.00630414	0.753339	-0.28324	0.0429342	intron_variant
ctg7180001245686_2227_SAG	14	67535363	LOC106570261	receptor-type tyrosine-protein phosphatase U-like	A	G	0.0387784	0.00037	1.47769e-09	0.0412495	0.0109412	1.28615	0.251652	0.0667493	intron_variant
ctg7180001855688_3936_SAC	15	6399839	ndufs4	NADH:ubiquinone oxidoreductase subunit S4	C	A	0.397412	0.027	3.20562e-27	-0.0446166	0.00413451	0.741172	-0.299522	0.027756	missense_variant
ctg7180001928587_5065_SGT	15	43455101	rad51b	RAD51 paralog B	G	T	0.480656	0.014	3.89248e-10	0.0116087	0.00568507	1.07883	0.0758788	0.0371597	intron_variant
ctg7180001864988_924_SCT	15	48812978	LOC106571738	1-phosphatidylinositol 4,5-bisphosphate phosphodiesterase beta-1-like	T	C	0.0760792	0.0054	1.1152e-61	0.0200939	0.0108397	1.1356	0.127162	0.0685976	intron_variant
ctg7180001741471_1939_SAG	15	58430112	LOC106571870	rabenosyn-5-like	A	G	0.0270464	0.63	2.69248e-92	-0.00535746	0.0176951	0.965217	-0.0354028	0.116931	missense_variant
ESTNV_32738_424	15	61834206	LOC106571940	prostaglandin E synthase 3-like	C	A	0.12753	3.3e-05	4.98269e-139	0.0888989	0.00746277	1.68856	0.523879	0.0439779	3_prime_UTR_variant
ctg7180001846746_1977_SAG	15	69126296	LOC106572154	zinc finger protein 362-like	A	G	0.0330467	0.15	8.41818e-31	-0.00940081	0.0113126	0.939306	-0.062614	0.0753475	intron_variant
ctg7180001937610_30305_SAG	15	71428857	LOC106572115	protein FAM110B-like	G	A	0.0855723	0.0098	1.24833e-43	-0.0170031	0.0103473	0.891723	-0.114599	0.0697398	synonymous_variant
ctg7180001835263_2012_SAC	16	27617999	LOC106573506	nuclear receptor ROR-alpha-like	C	A	0.0792585	7.6e-06	1.21385e-16	0.0917201	0.0110464	1.69956	0.53037	0.0638757	intron_variant
ctg7180001551313_4566_SAG	18	25166953	LOC106577101	equilibrative nucleoside transporter 1-like	A	G	0.0553914	0.51	3.15986e-19	0.00625042	0.0126634	1.04125	0.0404207	0.0818926	upstream_gene_variant
ctg7180001569596_4529_SCT	18	25208091	LOC106577101	equilibrative nucleoside transporter 1-like	C	T	0.139083	9e-32	5.84771e-45	0.0767387	0.0070195	1.58218	0.458803	0.041968	intron_variant
ctg7180001837800_144_SAG	20	72692457	LOC106581384	stromal interaction molecule 1-like	A	G	0.111365	0.11	2.62157e-09	-0.0538993	0.00908158	0.676902	-0.390229	0.0657504	intron_variant
ctg7180001934331_6497_SGT	21	470604	LOC106581613	E3 ubiquitin-protein ligase MYCBP2-like	G	T	0.355051	7.1e-14	8.17812e-20	0.0243621	0.00422286	1.17043	0.157373	0.0272786	intron_variant
ctg7180001601821_301_SAC	21	4185550	fgf14	fibroblast growth factor 14	C	A	0.401128	0.92	1.78928e-13	-0.000962708	0.00411662	0.993722	-0.00629782	0.02693	intron_variant
ctg7180001488577_4237_SAC	21	11565672	LOC106581859	integrin beta-2-like	A	C	0.359842	1.1e-20	1.49539e-21	0.0306022	0.00420433	1.21813	0.197315	0.0271084	intergenic_region
ctg7180001915588_5286_SAG	21	38860616	LOC106582292	zinc finger protein Helios-like	A	G	0.217491	5.5e-15	8.41118e-09	-0.0400709	0.00694255	0.75847	-0.276451	0.0478971	intergenic_region
ctg7180001878500_1834_SCT	21	49640687	LOC106582431	trace amine-associated receptor 13c-like	T	C	0.257254	2.8e-15	5.88236e-09	0.0387019	0.00663241	1.27758	0.244967	0.0419803	intergenic_region
ctg7180001798334_1044_SAC	22	13016434	LOC106582845	contactin-4-like	C	A	0.210013	3.6e-05	1.56709e-09	0.0425985	0.00706302	1.30576	0.266782	0.0442336	intron_variant
ctg7180001835188_7873_SGT	24	3281989	LOC106584946	selenoprotein M-like	G	T	0.255418	2.7e-13	7.00386e-14	0.0496426	0.00661776	1.36591	0.311822	0.0415684	intergenic_region
ctg7180001917449_11936_SCT	24	44132511	LOC106585937	sodium-dependent phosphate transporter 2-like	T	C	0.0273151	1.6e-13	5.10723e-09	-0.0729791	0.0124627	0.565386	-0.570246	0.0973814	intron_variant
ctg7180001858694_12350_SAC	25	5156033	LOC106586064	striated muscle preferentially expressed protein kinase-like	A	C	0.40283	1.2e-21	3.42526e-13	-0.0421072	0.00576468	0.754373	-0.281868	0.0385891	intron_variant
ctg7180001898543_7625_SAG	25	15968978	LOC106586268	UDP-glucose:glycoprotein glucosyltransferase 1-like	A	G	0.341752	2.2e-23	1.41142e-11	0.0339421	0.00419501	1.24366	0.218061	0.0269508	synonymous_variant
ctg7180001860674_9421_SCT	25	16089509	LOC106586269	multidrug resistance-associated protein 4-like	T	C	0.256314	4.7e-23	9.82365e-29	-0.0340551	0.00455361	0.79333	-0.231517	0.0309568	intergenic_region
ctg7180001793476_7787_SCT	25	18675805	LOC106586317	rho-related GTP-binding protein RhoE-like	T	C	0.228461	5e-26	0	-0.0589788	0.00671011	0.657962	-0.418609	0.0476258	intergenic_region
ctg7180001643209_2345_SAC	25	19065561	LOC106586310	rab3 GTPase-activating protein catalytic subunit-like	A	C	0.274584	0.0081	5.80337e-143	-0.014264	0.00634246	0.909751	-0.0945842	0.0420567	intron_variant
ctg7180001926764_1332_SAG	25	26225706	LOC106586456	titin-like	G	A	0.312511	4.8e-12	0	-0.0357747	0.00619833	0.785306	-0.241682	0.0418738	missense_variant
ctg7180001217206_1077_SCT	25	28910202	LOC106586520	uncharacterized LOC106586520	C	T	0.362171	8.7e-133	0	-0.115146	0.00581234	0.426012	-0.853288	0.0430723	downstream_gene_variant
ctg7180001217206_1077_SCT	25	28910202	LOC106586514	transcription cofactor vestigial-like protein 3	C	T	0.362171	8.7e-133	0	-0.115146	0.00581234	0.426012	-0.853288	0.0430723	downstream_gene_variant
ctg7180001819701_3320_SCT	25	32937886	LOC106586625	atypical chemokine receptor 3-like	C	T	0.169219	8.4e-11	0	-0.0355234	0.00757565	0.782549	-0.245198	0.0522905	intergenic_region
ctg7180001835062_1081_SCT	25	34363311	LOC106586653	Na(+)/H(+) exchange regulatory cofactor NHE-RF3-like	T	C	0.408606	8.6e-05	0	-0.0172526	0.00578341	0.892552	-0.11367	0.0381045	upstream_gene_variant
ctg7180001296062_894_SAC	25	39830912	LOC106586753	cell surface A33 antigen-like	A	C	0.199803	2.4e-42	0	-0.0754095	0.00706882	0.572803	-0.557213	0.0522326	intron_variant
ctg7180001426009_4985_SAC	25	39930303	LOC106586749	NXPE family member 3-like	C	A	0.442907	2e-21	6.93685e-57	-0.0420487	0.00569482	0.756171	-0.279487	0.037852	missense_variant
ctg7180001799947_11827_SAC	25	42219401	LOC106586824	collagen alpha-2(V) chain-like	C	A	0.0557048	0.0017	2.97775e-11	0.0230877	0.00877738	1.15624	0.145172	0.055191	intron_variant
ctg7180001820378_7615_SGT	25	45724269	LOC106586862	uncharacterized LOC106586862	G	T	0.292629	9.7e-09	0	0.0278923	0.00623826	1.19562	0.178668	0.03996	intergenic_region
ctg7180001925086_4128_SCT	28	23107156	nrxn1	neurexin 1	C	T	0.149606	9.3e-05	2.48252e-09	-0.0425301	0.00714021	0.742089	-0.298286	0.050078	intergenic_region
ctg7180001906010_8253_SAC	29	5335444	LOC106590053	cadherin-12-like	C	A	0.0892441	3.4e-21	1.99271e-75	0.136958	0.00858337	2.14609	0.763648	0.047859	intergenic_region
ctg7180001935223_7196	29	6866777	LOC106590047	ribonuclease 3-like	A	C	0.04048	0.64	3.2249e-21	-0.000741929	0.0144159	0.995153	-0.00485839	0.0944	intron_variant

## Sheet: Table S3
Table S3. List of all 512,397 SNPs in final dataset. Output statistics from BOLT-LMM (p-value, Beta & Beta_SE) and LMOR (OR, log(OR) & SE_T) are listed. The p-value indicates significance of the association test performed in BOLT-LMM using a non-infinitesimal model. Beta and its corresponding standard error (Beta_SE) were estimated using BOLT-LMM and indicate the effect size of the minor allele. …
Chr	SNP	BP	Allele 1	Allele 2	Allele 1 Freq	p-value	Beta	Beta_SE	OR	log(OR)	SE_T
1	ctg7180001821678_3502_SCT	33211	T	C	0.45858	0.067	0.00584655	0.00404065	1.03894	0.0381988	0.0263998
1	ctg7180001597877_901_SAG	43696	G	A	0.210147	0.19	-0.006234	0.00495942	0.959758	-0.0410736	0.0326759
1	ctg7180001597877_1190_SCT	43985	C	T	0.209386	0.094	-0.00762484	0.00496575	0.95092	-0.0503254	0.0327749
1	ctg7180001810865_8628_SCT	63158	T	C	0.049391	0.33	0.00913203	0.00929302	1.06051	0.0587484	0.0597841
1	ctg7180001810865_8537_SCT	63249	C	T	0.161025	0.27	-0.00453189	0.00548276	0.970616	-0.0298239	0.0360815
1	ctg7180001824326_121_SAG	92610	A	G	0.049391	0.7	-0.00107143	0.00929302	0.993004	-0.00702015	0.0608891
1	ctg7180001746883_257_SAG	161437	A	G	0.248881	0.99	-0.0027784	0.0046545	0.981944	-0.0182209	0.0305244
1	ctg7180001815388_2565_SCT	165234	T	C	0.36947	0.093	0.00699389	0.00417117	1.04663	0.0455729	0.0271798
1	ctg7180001927723_2014_SCG	182541	G	C	0.0585259	0.34	0.00521887	0.00857395	1.03439	0.0338131	0.0555507
1	ctg7180001927723_2132_SAG	182659	G	A	0.245343	0.45	-0.00274076	0.00468573	0.982187	-0.017974	0.0307292
1	ctg7180001897086_3571_SAG	195358	A	G	0.164204	0.046	-0.0113748	0.00543206	0.927192	-0.0755943	0.0361002
1	ctg7180001897086_3202_SAG	195727	G	A	0.238358	0.011	-0.00885971	0.00472931	0.943174	-0.0585047	0.0312298
1	ctg7180001897086_3036_SCT	195893	C	T	0.0105678	0.085	-0.0218952	0.0196782	0.860712	-0.149996	0.134808
1	ctg7180001897086_1641_SCT	197288	C	T	0.0615261	0.69	0.0030876	0.00837395	1.02028	0.0200804	0.0544605
1	ctg7180001897086_1632_SAG	197297	A	G	0.0616156	0.57	0.0041125	0.00836826	1.02706	0.026698	0.054326
1	ctg7180001897086_1424_SAG	197505	A	G	0.487865	0.023	0.0094834	0.00402793	1.06397	0.0620048	0.0263356
1	ctg7180001897086_1157_SAC	197772	A	C	0.165637	0.031	-0.012063	0.00541579	0.922891	-0.0802438	0.0360261
1	ctg7180001897086_757_SGT	198172	G	T	0.406591	0.68	-0.00224688	0.00409842	0.985402	-0.0147057	0.0268239
1	ctg7180001917336_15475_SCT	202745	T	C	0.222954	0.34	-0.00503558	0.00483719	0.967422	-0.03312	0.0318152
1	ctg7180001813202_3416_SCT	219039	T	C	0.0225685	0.015	0.0274533	0.013548	1.1863	0.170835	0.0843059
1	ctg7180001813202_1748_SAG	220961	G	A	0.450654	0.21	-0.00593489	0.00404817	0.961885	-0.0388608	0.0265068
1	ctg7180001830073_1880_SCT	227879	T	C	0.242074	0.25	-0.0050709	0.00470055	0.967209	-0.0333405	0.0309055
1	ctg7180001830073_2364_SAC	228363	A	C	0.226849	0.37	-0.00448855	0.00480843	0.97093	-0.0295011	0.0316035
1	ctg7180001830073_2681_SGT	228680	T	G	0.225819	0.37	-0.00452885	0.00482021	0.970671	-0.0297679	0.031683
1	ctg7180001792779_622_SCT	231206	T	C	0.250045	0.4	-0.00732082	0.00667606	0.952904	-0.0482414	0.0439927
1	ctg7180001919815_5888_SAG	268091	A	G	0.0322407	0.036	0.019846	0.0118882	1.13339	0.12521	0.0750038
1	ctg7180001919815_5802_SAG	268177	A	G	0.0592871	0.15	0.00796182	0.00852387	1.05268	0.0513414	0.0549658
1	ctg7180001887460_1009_SAC	274981	C	A	0.331318	0.35	-0.00505322	0.00427697	0.967382	-0.0331623	0.0280681
1	ctg7180001887460_536_SAG	275669	A	G	0.0542719	0.38	-0.00393571	0.00888955	0.97441	-0.0259232	0.0585525
1	ctg7180001289210_1668_SAG	281369	G	A	0.0947519	0.53	0.000387702	0.00687237	1.00254	0.00253365	0.0449112
1	ctg7180001913355_3441_SAG	300745	A	G	0.404666	0.01	-0.00885518	0.00410285	0.943535	-0.0581222	0.0269296
1	ctg7180001913355_3429_SCT	300757	T	C	0.404532	0.033	-0.00735767	0.00410364	0.952885	-0.0482609	0.0269168
1	ctg7180001934810_1522_SGT	309513	T	G	0.0841394	0.84	-0.00161725	0.00731807	0.989451	-0.0106047	0.0479864
1	ctg7180001934810_2507_SAG	310498	A	G	0.256	0.089	-0.011184	0.00660611	0.92868	-0.0739907	0.0437045
1	ctg7180001934810_9279_SCT	317156	C	T	0.194698	0.02	-0.0106957	0.00514756	0.931542	-0.0709144	0.0341292
1	ctg7180001934810_9306_SAC	317183	C	A	0.0640337	0.023	-0.0172284	0.00823164	0.890165	-0.116348	0.0555906
1	ctg7180001853502_1572_SAC	332742	A	C	0.315243	0.63	-0.00170123	0.004349	0.988923	-0.0111391	0.0284758
1	ctg7180001559386_1400_SGT	342214	G	T	0.0627351	0.92	-0.00512012	0.00830612	0.966772	-0.0337931	0.0548208
1	ctg7180001471464_154_SAC	360466	C	A	0.132456	0.64	-0.00640729	0.00594058	0.958572	-0.0423109	0.039229
1	ctg7180001471464_198_SAC	360510	A	C	0.131739	0.69	-0.00597752	0.00595311	0.961321	-0.0394472	0.0392861
1	ctg7180001872135_4330_SAG	362744	A	G	0.373097	0.64	-0.00249358	0.00416343	0.983805	-0.0163275	0.0272613
1	ctg7180001657734_1492_SGT	398747	T	G	0.425981	0.26	0.00456864	0.00407166	1.03029	0.0298364	0.0265908
1	ctg7180001812206_3221_SAC	410100	C	A	0.191295	0.0073	-0.0101993	0.00511889	0.934645	-0.067588	0.0339215
1	ctg7180001812206_6097_SAG	413496	A	G	0.0784524	0.025	-0.0139932	0.00749053	0.91044	-0.093827	0.0502254
1	ctg7180001812206_6131_SAG	413530	A	G	0.081184	0.12	-0.0100381	0.00737972	0.935373	-0.0668103	0.049117
1	ctg7180001628686_810_SGT	417977	T	G	0.0298675	0.056	0.0180054	0.0118256	1.12068	0.113938	0.0748326
1	ctg7180001628686_930_SCT	418097	T	C	0.024091	0.011	0.02875	0.0131357	1.19548	0.178547	0.081577
1	ctg7180001628686_1829_SCT	418996	T	C	0.359395	0.83	-0.00201275	0.00419689	0.986909	-0.0131772	0.0274765
1	ctg7180001628686_2174_SCT	419341	T	C	0.359126	0.78	-0.00208827	0.00419759	0.986421	-0.0136723	0.0274823
1	ctg7180001628686_2900_SAC	420067	A	C	0.0301809	0.047	0.0193808	0.0117614	1.13015	0.122354	0.0742513
1	ctg7180001628686_3367_SAG	420534	A	G	0.443758	0.0026	-0.0106516	0.00405194	0.932532	-0.069852	0.0265722
1	ctg7180001628686_3415_SGT	420582	T	G	0.215028	0.4	-0.00533802	0.00489905	0.965482	-0.0351278	0.0322391
1	ctg7180001933137_10669_SAG	444641	A	G	0.44134	0.0092	0.0102109	0.00405607	1.0689	0.0666334	0.0264687
1	ctg7180001933137_10769_SGT	444741	G	T	0.441788	0.017	0.00941355	0.0040549	1.06337	0.0614394	0.0264651
1	ctg7180001933137_11604_SCT	445576	C	T	0.0690937	0.0059	-0.0140976	0.00801687	0.909739	-0.0945976	0.0537948
1	ctg7180001933137_11892_SAG	445864	G	A	0.329617	0.72	0.00140473	0.00604042	1.00922	0.00917695	0.0394614
1	ctg7180001933137_11939_SAG	445911	A	G	0.0142844	0.0005	-0.0475185	0.0198301	0.707219	-0.346415	0.144564
1	ctg7180001205147_440_SAG	463470	A	G	0.299257	0.14	0.00975524	0.00630778	1.06535	0.0633078	0.0409351
1	ctg7180001600376_564_SCT	505871	T	C	0.25918	0.039	-0.00766958	0.00459964	0.950712	-0.0505441	0.0303126
1	ctg7180001922985_3753_SAC	515982	C	A	0.28551	0.54	-0.00116816	0.00446644	0.992382	-0.0076467	0.029237
1	ctg7180001922985_5430_SCT	517659	T	C	0.34314	0.041	0.00806055	0.00424238	1.05385	0.0524515	0.027606
1	ctg7180001922985_8366_SAC	525657	C	A	0.0590184	0.35	0.00464542	0.0085386	1.03059	0.0301282	0.0553777
1	ctg7180001583232_955_SCT	534972	T	C	0.0651531	0.24	0.00651998	0.00817889	1.04306	0.0421549	0.0528805
1	ctg7180001883208_1367_SAG	548337	G	A	0.196892	0.54	0.00160804	0.00532338	1.01055	0.0104946	0.0347421
1	ctg7180001883208_823_SGT	548881	G	T	0.479044	0.53	0.00573358	0.00568557	1.03819	0.0374792	0.0371653
1	ctg7180001883208_521_SCT	549183	T	C	0.0575407	0.94	-0.00558901	0.00919459	0.963749	-0.036924	0.0607444
1	ctg7180001214327_3499_SCT	565459	T	C	0.101334	0.058	-0.0122611	0.00731639	0.921407	-0.0818531	0.048843
1	ctg7180001214327_3300_SCT	565658	T	C	0.497851	0.0062	-0.0191938	0.00586362	0.88188	-0.125699	0.0384004
1	ctg7180001214327_2999_SAG	565959	A	G	0.393382	0.34	-0.00562199	0.00597514	0.963813	-0.0368576	0.0391728
1	ctg7180001214327_2460_SAC	566498	C	A	0.029151	0.31	-0.00655609	0.0122099	0.957505	-0.0434247	0.080873
1	ctg7180001214327_2275_SAC	566683	A	C	0.12341	0.34	-0.00893323	0.00618868	0.942475	-0.0592456	0.0410436
1	ctg7180001909144_2906_SCT	579062	C	T	0.416353	0.41	-0.00304096	0.00408456	0.98029	-0.0199068	0.0267384
1	ctg7180001911221_2588_SGT	582535	G	T	0.40377	0.17	-0.0073195	0.00410508	0.953124	-0.0480108	0.0269264
1	ctg7180001930926_3107_SCT	588737	C	T	0.0978864	0.75	-0.00203649	0.00677485	0.986727	-0.0133618	0.0444512
1	ctg7180001732344_1300_SCT	601569	C	T	0.122649	0.5	-0.00356198	0.00613987	0.97685	-0.0234219	0.0403729
1	ctg7180001909675_2028_SCT	656367	C	T	0.411875	0.11	-0.00501026	0.00408991	0.967708	-0.0328252	0.0267954
1	ctg7180001512723_887_SCT	670263	T	C	0.276554	0.82	-0.00205473	0.00450214	0.986628	-0.0134617	0.0294961
1	ctg7180001571107_703_SAG	670279	A	G	0.0165234	0.022	0.0290953	0.016773	1.19774	0.180434	0.104017
1	ctg7180001887460_771_SAG	749006	A	G	0.3512	0.25	-0.0058712	0.00421975	0.962198	-0.038535	0.0276959
1	ctg7180001799308_4371_SCT	761164	C	T	0.384068	0.021	-0.00866137	0.00414008	0.944701	-0.0568866	0.0271914
1	ctg7180001799308_4593_SAG	761386	A	G	0.178175	0.094	-0.00733556	0.00525966	0.95271	-0.0484442	0.0347349
1	ctg7180001877466_6225_SAG	775507	G	A	0.281838	0.0024	-0.0103706	0.00448203	0.933818	-0.0684734	0.0295932
1	ctg7180001877466_6273_SCT	775555	C	T	0.109887	0.13	-0.00926059	0.00646208	0.940371	-0.0614812	0.0429018
1	ctg7180001877466_8140_SAC	777422	A	C	0.335348	0.99	-0.000869244	0.00613155	0.994329	-0.00568751	0.040119
1	ctg7180001664070_2678_SCT	801784	C	T	0.235716	0.0098	0.024502	0.00685683	1.16932	0.156423	0.0437746
1	ctg7180001664070_2019_SGT	802443	T	G	0.0504657	0.19	0.0129504	0.00921587	1.08629	0.0827703	0.0589017
1	ctg7180001664070_1965_SAG	802497	A	G	0.0504657	0.026	0.0192727	0.00921155	1.12962	0.121881	0.0582543
1	ctg7180001664070_1862_SCT	802600	C	T	0.0511374	0.047	0.0178396	0.00914326	1.11973	0.113091	0.0579622
1	ctg7180001664070_563_SAC	803899	A	C	0.372963	0.32	-0.00304658	0.00416953	0.980243	-0.0199544	0.0273094
1	ctg7180001513938_328_SAG	807480	G	A	0.0643471	0.13	-0.0107217	0.00841131	0.930994	-0.0715023	0.0560945
1	ctg7180001929981_2128_SCT	810675	C	T	0.281076	0.00021	-0.0131941	0.00447901	0.916345	-0.0873622	0.0296569
1	ctg7180001929981_2570_SGT	811117	G	T	0.14674	0.13	-0.00842246	0.0056902	0.94576	-0.0557667	0.0376759
1	ctg7180001929981_2687_SAC	811234	C	A	0.280405	0.00036	-0.0126843	0.00448203	0.91948	-0.0839469	0.0296629
1	ctg7180001929981_2973_SCT	811520	T	C	0.0856171	0.59	-0.000858302	0.00719162	0.994395	-0.00562078	0.0470959
1	ctg7180001929981_3120_SAC	811667	C	A	0.22161	0.0048	-0.0120944	0.00484765	0.922903	-0.0802311	0.032158
1	ctg7180001929981_3151_SAG	811698	A	G	0.0145531	0.02	-0.0345468	0.0180749	0.78374	-0.243678	0.127493
1	ctg7180001326802_2178_SAG	823092	G	A	0.116738	0.029	-0.0119377	0.00627802	0.923497	-0.0795882	0.0418553
1	ctg7180001326802_2233_SAG	823147	A	G	0.27942	0.028	-0.00805077	0.00448786	0.94834	-0.0530419	0.0295679
1	ctg7180001746656_7181_SCT	850468	C	T	0.104155	0.8	0.00241628	0.00659373	1.01586	0.0157396	0.0429513
1	ctg7180001746656_3438_SAG	854211	A	G	0.149561	0.0063	-0.0127209	0.00564209	0.918719	-0.0847745	0.0376
1	ctg7180001746656_2789_SAC	854860	A	C	0.284077	0.48	-0.00333833	0.00446387	0.978343	-0.0218952	0.0292774
1	ctg7180001746656_2749_SAC	854900	A	C	0.0572721	0.87	-0.00561418	0.00866157	0.963587	-0.0370922	0.057226
1	ctg7180001746656_2365_SCT	855284	T	C	0.343319	0.026	0.00847977	0.00423974	1.05672	0.0551664	0.0275823
1	ctg7180001829430_6707_SCT	866585	T	C	0.460953	0.11	-0.00501237	0.00403818	0.967726	-0.0328061	0.02643
1	ctg7180001867230_1846_SAG	876184	G	A	0.35429	0.017	0.00912092	0.00420948	1.06114	0.0593398	0.0273865
1	ctg7180001908699_5579_SCT	890454	C	T	0.250224	0.13	-0.00745929	0.00465059	0.952028	-0.049161	0.03065
1	ctg7180001904014_2059_SAC	899987	A	C	0.139307	0.17	-0.00432015	0.00581276	0.971968	-0.0284328	0.0382564
1	ctg7180001904014_1995_SAG	900051	A	G	0.278972	0.0056	-0.0094677	0.00448857	0.939447	-0.0624641	0.0296138
1	ctg7180001904014_1989_SAG	900057	G	A	0.278435	0.01	-0.00882869	0.00449073	0.943449	-0.058213	0.0296102
1	ctg7180001904014_1894_SGT	900152	T	G	0.086647	0.19	-0.00389049	0.00715785	0.974715	-0.02561	0.0471181
1	ctg7180001357910_639_SGT	904222	T	G	0.0612574	0.28	0.0061591	0.00839763	1.04065	0.0398423	0.054323
1	ctg7180001357910_904_SAG	904487	G	A	0.111454	0.012	-0.00996107	0.00639487	0.935938	-0.0662055	0.042503
1	ctg7180001887070_2910_SCG	933558	G	C	0.110604	0.24	0.00393922	0.00641854	1.02593	0.0256008	0.0417138
1	ctg7180001913721_6283_SAC	941037	A	C	0.312422	0.024	-0.00588313	0.00434444	0.962088	-0.0386497	0.0285411
1	ctg7180001233371_929_SAT	951995	A	T	0.311616	0.03	-0.00569136	0.00434706	0.963305	-0.0373847	0.0285544
1	ctg7180001233371_808_SAG	952116	G	A	0.112663	0.2	-0.00812089	0.00636693	0.947615	-0.0538067	0.0421855
1	ctg7180001233371_803_SGT	952121	G	T	0.11235	0.2	-0.00833626	0.00637397	0.946245	-0.0552541	0.0422477
1	ctg7180001635329_1524_SCT	970205	T	C	0.368843	0.59	-0.000411905	0.00417144	0.997309	-0.00269413	0.027284
1	ctg7180001725294_1138_SGT	1020935	T	G	0.442549	0.073	0.00568284	0.00405325	1.03781	0.0371162	0.0264729
1	ctg7180001836945_279_SCT	1032003	C	T	0.201952	0.96	0.00186292	0.00501573	1.01223	0.0121547	0.0327253
1	ctg7180001836945_3728_SCT	1035454	T	C	0.130485	0.4	0.00501671	0.00597617	1.0331	0.0325623	0.0387899
1	ctg7180001836945_4747_SGT	1036473	G	T	0.125157	0.3	0.00769588	0.00608666	1.05101	0.0497506	0.0393477
1	ESTNV_27268_490	1055840	T	A	0.0436593	0.21	-0.00697149	0.00994667	0.954856	-0.046195	0.0659094
1	ctg7180001472339_343_SAC	1068380	A	C	0.347036	0.027	0.0083533	0.00423083	1.05586	0.0543545	0.0275298
1	ctg7180001472339_676_SCT	1068713	T	C	0.0811392	0.71	-0.00121499	0.00737603	0.99207	-0.00796164	0.0483339
1	ctg7180001803967_14759_SAC	1083816	C	A	0.281256	0.62	-0.00412216	0.00457347	0.973306	-0.0270568	0.030019
1	ctg7180001756682_65_SGT	1095284	G	T	0.486074	0.42	0.00357916	0.00402975	1.02368	0.0234012	0.0263473
1	ctg7180001803820_1389_SAG	1101439	A	G	0.0780494	0.26	0.00932749	0.00752114	1.06189	0.0600498	0.0484206
1	ctg7180001823088_1335_SAC	1115121	C	A	0.386665	0.0084	0.00893154	0.00414547	1.05991	0.0581818	0.0270044
1	ctg7180001823088_1243_SGT	1115213	G	T	0.416935	0.24	-0.00401115	0.00578013	0.974075	-0.0262669	0.0378511
1	ctg7180001823088_1164_SAG	1115292	A	G	0.0739298	0.041	0.0152531	0.00775002	1.10213	0.0972466	0.0494105
1	ctg7180001425722_163_SAG	1117909	G	A	0.316676	0.47	-0.00197349	0.00432922	0.987159	-0.0129243	0.0283519
1	ctg7180001425722_125_SAC	1117947	C	A	0.326348	0.5	-0.00209059	0.00429504	0.986402	-0.0136913	0.0281282
1	ctg7180001908541_5974_SAG	1137084	G	A	0.127351	0.65	-0.0045375	0.00604088	0.970562	-0.0298798	0.0397797
1	ctg7180001908541_5841_SAC	1137217	A	C	0.0414204	0.67	-0.00657093	0.0101413	0.957423	-0.0435098	0.0671512
1	ctg7180001908541_5452_SAG	1137606	A	G	0.106618	0.96	-0.00315597	0.00652213	0.97947	-0.0207433	0.042868
1	ctg7180001865622_3225_SGT	1148306	T	G	0.223401	0.14	-0.00486336	0.00490132	0.968525	-0.0319806	0.0322302
1	ctg7180001865622_3260_SCT	1148341	T	C	0.291734	0.24	-0.00652152	0.00631016	0.958017	-0.0428895	0.0414995
1	ctg7180001865622_4457_SCT	1149538	C	T	0.217894	0.58	-0.00159076	0.00489367	0.989633	-0.0104215	0.0320597
1	ctg7180001865623_882_SAG	1151526	A	G	0.271091	0.19	-0.00368468	0.00453385	0.976111	-0.0241792	0.0297515
1	ctg7180001865623_1632_SAG	1152277	G	A	0.270419	0.14	-0.00429784	0.00453765	0.972175	-0.0282198	0.0297944
1	ctg7180001865623_1813_SGT	1152458	G	T	0.270822	0.067	-0.00560278	0.00453526	0.963835	-0.0368347	0.0298164
1	ctg7180001865623_1981_SCT	1152626	C	T	0.271001	0.043	-0.00629451	0.00453484	0.959435	-0.0414103	0.0298338
1	ctg7180001865623_3121_SAG	1153835	A	G	0.0618843	0.042	-0.0110178	0.00837066	0.929112	-0.0735265	0.055861
1	ctg7180001865623_3444_SAC	1154158	C	A	0.268986	0.8	-0.000150439	0.00454218	0.999017	-0.000983893	0.0297065
1	ctg7180001865623_3691_SAG	1154405	A	G	0.346812	0.031	0.00810484	0.00423294	1.05416	0.0527447	0.0275472
1	ctg7180001865623_4067_SCT	1154781	T	C	0.0445549	0.13	-0.0172034	0.00975517	0.890174	-0.116338	0.0659693
1	ctg7180001865623_4592_SGT	1155306	G	T	0.0827064	0.71	-0.00304725	0.00730869	0.980168	-0.0200311	0.0480436
1	ctg7180001865623_4832_SCT	1155546	C	T	0.410308	0.099	-0.00414265	0.00409473	0.973232	-0.0271324	0.0268186
1	ctg7180001278275_3624_SCT	1180561	C	T	0.332617	0.072	-0.00638792	0.00427298	0.958907	-0.0419609	0.0280683
1	ctg7180001278275_3599_SAG	1180586	G	A	0.332124	0.11	-0.0057434	0.00427435	0.962992	-0.0377099	0.0280645
1	ctg7180001278275_2873_SCT	1181312	T	C	0.0903188	0.8	-0.00216826	0.00703247	0.98587	-0.0142305	0.0461547
1	ctg7180001278275_2757_SAC	1181428	C	A	0.421055	0.052	-0.0067531	0.00407946	0.956702	-0.0442634	0.0267389
1	ctg7180001278275_527_SAG	1183658	A	G	0.43928	1	0.00196754	0.0057618	1.01294	0.0128601	0.0376598
1	ctg7180001788090_964_SCT	1187233	C	T	0.279644	0.01	-0.0103143	0.00448851	0.934163	-0.0681043	0.0296372
1	ctg7180001305621_869_SAC	1188989	C	A	0.414876	0.58	-0.00229838	0.00408798	0.985071	-0.0150419	0.026754
1	ctg7180001859338_2336_SGT	1208020	T	G	0.105902	0.11	-0.00896784	0.0065431	0.942219	-0.0595171	0.0434248
1	ctg7180001817171_219_SAG	1222228	G	A	0.371933	0.86	-0.00114918	0.00592036	0.992509	-0.00751928	0.0387379
1	ctg7180001817171_3236_SAG	1225245	G	A	0.0347931	0.00032	0.0306294	0.0110805	1.20909	0.189869	0.0686872
1	ctg7180001805948_1604_SGT	1238121	T	G	0.449087	0.086	0.00686459	0.00404671	1.04585	0.0448327	0.0264291
1	ctg7180001805948_5336_SAG	1241853	A	G	0.451908	0.014	-0.00810131	0.00404424	0.948311	-0.0530729	0.0264944
1	ctg7180001242004_131_SAC	1247665	C	A	0.0157174	0.17	0.0183075	0.0162131	1.12263	0.115671	0.102438
1	ctg7180001197971_1237_SCT	1260538	C	T	0.436593	0.26	0.0035596	0.00405789	1.02353	0.0232567	0.0265122
1	ctg7180001918655_3492_SAG	1281962	A	G	0.239343	0.6	-0.0033404	0.00471737	0.978316	-0.0219223	0.030959
1	ctg7180001918655_3726_SAC	1282196	C	A	0.439504	0.00071	0.0119762	0.0040551	1.08126	0.0781242	0.0264526
1	ctg7180001918655_7154_SCT	1285624	C	T	0.240417	0.75	-0.00274988	0.00470898	0.982127	-0.018035	0.0308837
1	ctg7180001903717_9405_SGT	1336322	G	T	0.0855275	0.0029	0.0214012	0.00719709	1.14485	0.135271	0.0454908
1	ctg7180001903717_6845_SAT	1338882	T	A	0.202534	0.2	0.00498805	0.0050079	1.03296	0.0324248	0.0325538
1	ctg7180001903717_6810_SGT	1338917	T	G	0.203609	0.068	0.00702694	0.00499803	1.04663	0.0455719	0.0324138
1	ctg7180001903717_6690_SCG	1339037	G	C	0.255463	0.85	-3.55566e-05	0.00461521	0.999768	-0.000232521	0.0301809
1	ctg7180001903717_6682_SAC	1339045	A	C	0.255687	0.77	0.000404475	0.00461416	1.00265	0.00264389	0.0301609
1	ctg7180001903717_6273_SAG	1339454	G	A	0.245164	0.027	0.00670566	0.00468462	1.04452	0.0435534	0.0304267
1	ctg7180001903717_5869_SAG	1339702	G	A	0.343319	0.32	0.00203803	0.00423974	1.0134	0.01331	0.027689
1	ctg7180001903717_5400_SAG	1340327	A	G	0.108544	0.29	-0.00675578	0.00647472	0.956317	-0.0446662	0.0428079
1	ctg7180001903717_3292_SCT	1342435	T	C	0.247134	0.27	0.00359305	0.00466747	1.02369	0.0234101	0.0304104
1	ctg7180001903717_2764_SCT	1342963	T	C	0.309377	0.32	0.00306916	0.00435569	1.02022	0.0200228	0.028416
1	ctg7180001903717_1546	1344181	G	A	0.0744224	6.1e-05	0.0337657	0.0109486	1.23287	0.209349	0.0678817
1	ctg7180001903717_1031_SCG	1344333	G	C	0.0651084	0.5	-0.00493589	0.00816492	0.96796	-0.0325645	0.0538681
1	ctg7180001929375_1002_SAG	1345557	G	A	0.0599588	0.32	-0.0082892	0.00848404	0.946451	-0.0550366	0.0563302
1	ctg7180001853083_1183_SGT	1384874	T	G	0.15189	0.4	-0.00154554	0.00560636	0.989922	-0.0101289	0.0367421
1	ctg7180001912077_90_SGT	1394475	G	T	0.370365	0.46	-0.00168601	0.00416789	0.989026	-0.0110351	0.0272793
1	ctg7180001912077_1422_SCT	1395836	T	C	0.1548	0.63	-0.00514537	0.00556534	0.966673	-0.0338952	0.0366618
1	ctg7180001912077_2004_SAC	1396418	C	A	0.0611231	0.93	-0.00179652	0.00840463	0.988283	-0.0117858	0.0551375
1	ctg7180001887462_1896_SGT	1451866	G	T	0.400188	0.078	-0.00764109	0.00410879	0.951103	-0.050133	0.0269577
1	ctg7180001579334_8268_SCT	1456592	T	C	0.153546	0.46	-0.00245187	0.00558389	0.984039	-0.0160893	0.0366419
1	ctg7180001579334_7973_SCT	1456887	C	T	0.153815	0.68	-0.000976139	0.00557797	0.993628	-0.00639201	0.036526
1	ctg7180001184744_1157_SAC	1468139	A	C	0.473849	0.012	0.00924005	0.004031	1.06224	0.0603816	0.0263417
1	ctg7180001184744_625_SCT	1468671	T	C	0.474655	0.0073	0.0096889	0.00403066	1.06536	0.0633156	0.0263398
1	ctg7180001842338_1309_SAC	1481076	C	A	0.0724521	0.011	0.0192169	0.00776465	1.12946	0.121743	0.0491905
1	ctg7180001842338_1148_SCT	1481237	T	C	0.0712431	0.018	0.0182493	0.00782653	1.12275	0.115778	0.0496534
1	ctg7180001842338_1099_SAG	1481286	A	G	0.0716013	0.00084	0.0241524	0.00780578	1.16397	0.151839	0.0490727
1	ctg7180001842338_942_SCT	1481443	C	T	0.390471	0.035	-0.00760292	0.00412535	0.951328	-0.0498968	0.027074
1	ctg7180001262948_1316_SCT	1486351	C	T	0.0424951	0.06	-0.0163198	0.00997817	0.895674	-0.110179	0.067365
1	ctg7180001262948_814_SAG	1486853	G	A	0.119246	0.26	-0.00912049	0.00620967	0.941279	-0.0605154	0.0412018
1	ctg7180001806549_1926_SCT	1498556	T	C	0.137113	0.12	-0.00489019	0.00584999	0.9683	-0.0322137	0.0385363
1	ctg7180001806549_3325_SAG	1499955	G	A	0.318512	0.27	-0.00555124	0.00432007	0.964202	-0.0364544	0.0283695
1	ctg7180001806549_4525_SGT	1501155	T	G	0.062153	0.02	-0.0123966	0.00833439	0.920402	-0.0829451	0.055765
1	ctg7180001806549_4684_SGT	1501314	T	G	0.406188	0.015	-0.00846554	0.00409811	0.945963	-0.055552	0.0268923
1	ctg7180001905779_8182_SAG	1514129	G	A	0.032196	0.76	-0.00189988	0.0114034	0.987608	-0.012469	0.0748413
1	ctg7180001904935_3534_SCT	1525147	C	T	0.11029	0.0049	0.0177548	0.00642433	1.11968	0.113039	0.0409016
1	ctg7180001904935_3833_SGT	1525446	T	G	0.306242	0.37	-0.00262276	0.00441772	0.98296	-0.0171868	0.0289491
1	ctg7180001904935_4036_SCT	1525649	C	T	0.281435	0.018	-0.0114334	0.0063596	0.927214	-0.0755706	0.0420346
1	ctg7180001831034_1524_SAG	1540836	A	G	0.268807	0.1	-0.00686116	0.00453951	0.955839	-0.0451662	0.029883
1	ctg7180001815734_1188_SAG	1575882	G	A	0.0605409	0.022	-0.0122066	0.0084407	0.921594	-0.0816507	0.0564604
1	ctg7180001905839_3757_SAG	1584848	A	G	0.179876	0.79	-0.000516628	0.00524094	0.996625	-0.00338062	0.0342948
1	ctg7180001905839_3411_SCT	1585194	T	C	0.0598245	0.53	0.00287779	0.00848452	1.0189	0.0187224	0.0551988
1	ctg7180001905839_2898_SAG	1585707	G	A	0.180011	0.97	-0.00154591	0.00523981	0.989922	-0.0101295	0.0343338
1	ctg7180001906150_4976_SAG	1609364	A	G	0.0335841	0.12	-0.010756	0.0111692	0.930685	-0.0718345	0.0745941
1	ctg7180001906150_426_SCT	1613314	T	C	0.307003	0.19	-0.00206902	0.00436294	0.986539	-0.013552	0.0285771
1	ctg7180001906150_166_SAC	1613574	A	C	0.190131	0.0063	-0.0100382	0.00512787	0.935654	-0.0665092	0.0339752
1	ctg7180001435915_1145_SGT	1639260	T	G	0.155114	0.28	-0.00654804	0.00795827	0.957697	-0.0432235	0.0525324
1	ctg7180001435915_1531_SCT	1639646	C	T	0.196892	0.0019	-0.0114019	0.00506489	0.927131	-0.0756606	0.0336095
1	ctg7180001646856_1436_SCT	1641873	C	T	0.197833	0.0096	-0.00944143	0.00505114	0.939426	-0.0624861	0.0334299
1	ctg7180001646856_1818_SAC	1642255	C	A	0.196848	0.003	-0.0109527	0.00506066	0.929939	-0.0726363	0.0335614
1	ctg7180001646856_1956_SGT	1642393	T	G	0.196848	0.0029	-0.0110261	0.00506066	0.92948	-0.0731303	0.0335647
1	ctg7180001646856_2372_SAG	1642809	G	A	0.196982	0.0059	-0.0100503	0.00505971	0.935596	-0.0665715	0.0335147
1	ctg7180001646856_3775_SGT	1644212	G	T	0.424816	0.029	0.00683019	0.00407124	1.04559	0.0445782	0.0265715
1	ctg7180001827163_1699_SAG	1652387	G	A	0.352723	0.25	-0.00296655	0.00421226	0.980754	-0.0194341	0.0275949
1	ctg7180001827163_5063_SCT	1655959	C	T	0.351872	0.3	-0.00280103	0.00421438	0.981819	-0.0183481	0.0276062
1	ctg7180001471134_589_SAG	1662695	A	G	0.235492	0.69	0.00133446	0.00504753	1.00875	0.00871385	0.0329597
1	ctg7180001471134_4244_SAG	1665945	A	G	0.226312	0.37	-0.00449154	0.00481	0.97091	-0.0295212	0.0316143
1	ctg7180001844360_3669_SGT	1668903	G	T	0.208624	0.021	-0.00829141	0.0049532	0.946701	-0.0547721	0.0327203
1	ctg7180001844360_2367_SCG	1670205	C	G	0.313944	0.48	-0.00413388	0.00433643	0.973245	-0.027119	0.0284478
1	ctg7180001873568_3212_SAG	1681484	A	G	0.101469	0.12	-0.00548764	0.00666569	0.964436	-0.0362115	0.0439851
1	ctg7180001873568_3085_SAC	1681611	C	A	0.0355096	0.0026	0.0258962	0.0109051	1.1756	0.16178	0.0681271
1	ctg7180001873568_2294_SAG	1682402	A	G	0.204505	0.15	-0.00335517	0.00498988	0.978211	-0.0220301	0.0327636
1	ctg7180001873568_1953_SCT	1682743	C	T	0.0245836	0.019	0.0248412	0.013037	1.168	0.155295	0.0815009
1	ctg7180001443735_617_SAG	1687551	A	G	0.172712	0.21	-0.00523079	0.00532623	0.966138	-0.034449	0.0350775
1	ctg7180001443735_560_SAG	1687608	G	A	0.210863	0.18	0.00414023	0.0049358	1.02731	0.0269441	0.0321215
1	ctg7180001443735_440_SCT	1687728	T	C	0.41089	0.16	-0.00239647	0.00409139	0.984437	-0.015685	0.0267783
1	ctg7180001443240_517_SCT	1705467	T	C	0.140068	0.16	0.00872217	0.00579896	1.05795	0.0563306	0.0374516
1	ctg7180001443240_1695_SCT	1706645	T	C	0.0841841	0.0011	0.0223348	0.00725321	1.15138	0.140959	0.0457765
1	ctg7180001733621_1059_SGT	1711856	G	T	0.0825273	0.46	-0.00645116	0.00731374	0.958237	-0.0426601	0.0483641
1	ctg7180001906150_6325_SAG	1717574	G	A	0.289629	0.023	-0.00530223	0.00443761	0.965765	-0.0348343	0.0291539
1	ctg7180001906150_6379_SGT	1717628	T	G	0.289898	0.046	-0.00440734	0.00443639	0.971483	-0.0289317	0.0291224
1	ctg7180001927617_113_SAC	1726322	A	C	0.113335	0.52	-0.00736442	0.00634971	0.952436	-0.0487325	0.0420179
1	ctg7180001862277_887_SAG	1735988	A	G	0.11741	0.0017	-0.0146758	0.00625085	0.906382	-0.0982944	0.0418665
1	ctg7180001862277_936_SAC	1736037	C	A	0.059914	0.38	0.0118162	0.00848195	1.07864	0.0757015	0.0543403
1	ctg7180001732252_614_SCT	1751807	C	T	0.345379	0.018	-0.00859736	0.00423246	0.945027	-0.0565413	0.0278351
1	ctg7180001511153_937_SGT	1758091	T	G	0.398934	0.022	-0.00687127	0.0041098	0.955933	-0.0450679	0.0269557
1	ctg7180001838318_308_SCT	1761316	T	C	0.0379276	0.83	0.00481065	0.0105436	1.03167	0.031178	0.0683335
1	ctg7180001867098_1095_SAG	1763887	A	G	0.039674	0.62	-0.00165517	0.0103088	0.989201	-0.0108573	0.0676221
1	ctg7180001266672_802_SAG	1781650	A	G	0.104603	0.86	0.0027844	0.00658437	1.01829	0.018127	0.0428655
1	ctg7180001266672_726_SGT	1781726	G	T	0.104245	0.67	0.00108834	0.0065928	1.00713	0.00710445	0.0430364
1	ctg7180001266672_604_SGT	1781848	G	T	0.192325	0.22	-0.00819235	0.00727498	0.947299	-0.0541407	0.0480781
1	ctg7180001839972_1728_SAC	1809897	A	C	0.0250313	0.028	0.0228271	0.0128864	1.15396	0.1432	0.0808394
1	ctg7180001839972_1285_SAC	1810340	C	A	0.329572	0.026	-0.00787834	0.00428162	0.949506	-0.0518132	0.0281588
1	ctg7180001933222_12515_SCT	1816839	T	C	0.134023	0.28	0.00322249	0.00590818	1.02119	0.0209725	0.0384515
1	ctg7180001933222_9775_SAG	1819579	A	G	0.112395	0.65	-0.00282178	0.00637357	0.981635	-0.0185354	0.0418659
1	ctg7180001933222_7319_SAC	1822035	C	A	0.493462	0.0098	-0.00673516	0.00402582	0.956899	-0.0440577	0.0263347
1	ctg7180001271954_1492_SCT	1839339	C	T	0.162457	0.42	-0.00127143	0.00545504	0.991706	-0.00832877	0.0357344
1	ctg7180001868137_2878_SCT	1954058	T	C	0.151352	0.7	0.00224338	0.00785243	1.01473	0.0146236	0.0511865
1	ctg7180001868137_4274_SCT	1955454	C	T	0.0229267	0.78	-0.00297457	0.0134442	0.980625	-0.0195651	0.0884287
1	ctg7180001868137_5262_SGT	1956442	T	G	0.108947	0.45	-0.00574654	0.00645895	0.962781	-0.0379297	0.0426319
1	ctg7180001694462_1245_SCT	1965981	T	C	0.0884829	0.4	0.00553062	0.00708728	1.03649	0.0358374	0.0459243
1	ctg7180001757823_457_SAC	1977770	A	C	0.150546	0.35	-0.00116473	0.00562686	0.9924	-0.00762911	0.0368566
1	ctg7180001757823_1337_SAG	1978650	A	G	0.148128	0.57	0.000752013	0.00566454	1.00492	0.00491229	0.0370018
1	ctg7180001403306_1454_SAC	2031916	C	A	0.359798	0.24	-0.0031335	0.00419321	0.979681	-0.0205281	0.0274704
1	ctg7180001568502_2385_SCT	2032691	T	C	0.101021	0.88	-0.000721403	0.00668208	0.995288	-0.00472296	0.043747
1	ctg7180001916130_124_SGT	2046403	T	G	0.440982	0.96	0.000279082	0.0040531	1.00183	0.00182486	0.0265023
1	ctg7180001916129_246_SGT	2049949	T	G	0.0134336	0.091	0.0157956	0.0179074	1.10543	0.100238	0.113639
1	ctg7180001935088_10750_SAG	2068533	A	G	0.152517	0.42	2.80981e-05	0.00559883	1.00018	0.000183732	0.0366105
1	ctg7180001935088_10804_SCT	2068587	T	C	0.153636	0.47	0.000400415	0.00558255	1.00262	0.00261692	0.0364849
1	ctg7180001935088_13288_SAC	2071071	C	A	0.203788	0.33	-0.000671371	0.00499709	0.995616	-0.00439381	0.0327036
1	ctg7180001935088_13301_SCT	2071084	C	T	0.0133889	0.79	-0.00484712	0.0176427	0.9685	-0.0320067	0.116499
1	ctg7180001881971_1823_SAG	2110235	G	A	0.297152	0.11	-0.0040463	0.00440444	0.973799	-0.02655	0.0288999
1	ctg7180001881971_1817_SCT	2110241	T	C	0.297242	0.19	-0.00316488	0.00440406	0.979463	-0.0207508	0.0288756
1	ctg7180001899461_5488_SCT	2177475	C	T	0.0937668	0.93	-0.00332067	0.00690282	0.978401	-0.0218355	0.0453903
1	ctg7180001719488_1235_SAC	2201460	C	A	0.0934981	0.61	0.00230244	0.00966102	1.01511	0.0149992	0.0629367
1	ctg7180001873632_2394_SCT	2206003	C	T	0.129769	0.14	0.006306	0.00600092	1.0417	0.0408534	0.0388769
1	ctg7180001873632_2919_SCT	2206528	T	C	0.0494806	0.38	-0.010194	0.00928946	0.9343	-0.0679582	0.0619281
1	ctg7180001829581_3409_SCT	2231375	C	T	0.108589	0.32	0.00718913	0.0064698	1.04758	0.0464867	0.0418353
1	ctg7180001829581_3414_SAC	2231380	C	A	0.107469	0.34	0.00737887	0.00650162	1.04885	0.0476982	0.0420275
1	ctg7180001829581_3554_SCT	2231520	C	T	0.107693	0.13	0.0100674	0.00649643	1.06696	0.0648129	0.0418233
1	ctg7180001829581_3565_SCT	2231531	T	C	0.137023	0.54	0.00135801	0.00832488	1.0089	0.00886258	0.0543294
1	ctg7180001829581_3845_SAG	2231811	A	G	0.062959	0.78	-0.00159545	0.00834482	0.989592	-0.0104628	0.0547246
1	ctg7180001843924_1720_SAT	2284920	A	T	0.0736163	0.46	0.00707232	0.00771034	1.04675	0.045694	0.0498162
1	ctg7180001794122_841_SGT	2308284	G	T	0.196937	0.15	-0.006358	0.00506409	0.958955	-0.0419115	0.0333821
1	ctg7180001248854_624_SAC	2326520	C	A	0.144412	0.079	-0.00781167	0.00572813	0.949634	-0.0516785	0.0378947
1	ctg7180001446793_4510_SAG	2334132	A	G	0.233656	0.02	-0.0076411	0.0047582	0.950853	-0.0503953	0.0313817
1	ctg7180001446793_4223_SAC	2334419	C	A	0.320571	0.29	0.00333725	0.00431402	1.02201	0.0217707	0.0281428
1	ctg7180001446793_3848_SAC	2334794	C	A	0.453564	0.17	0.00330247	0.00404461	1.02182	0.0215829	0.0264331
1	ctg7180001446793_1886_SCT	2336701	C	T	0.187623	0.68	-0.00101285	0.00515557	0.99339	-0.00663182	0.033757
1	ctg7180001828735_1609_SAG	2343128	G	A	0.227924	0.76	0.000564091	0.00480592	1.00369	0.00368641	0.0314073
1	ctg7180001828735_1648_SAG	2343167	A	G	0.298361	0.15	-0.00906001	0.00644693	0.94204	-0.0597074	0.0424867
1	ctg7180001828735_2074_SCT	2343593	T	C	0.040883	0.089	0.00798119	0.0101937	1.05278	0.0514342	0.0656926
1	ctg7180001828735_2184_SAG	2343703	A	G	0.187668	0.56	-0.00174532	0.00515548	0.988627	-0.0114386	0.0337882
1	ctg7180001828735_2364_SCT	2343883	T	C	0.0424951	0.0042	0.0170181	0.0100168	1.11401	0.107968	0.0635495
1	ctg7180001793578_2294_SAG	2354651	G	A	0.18825	0.61	-0.00464546	0.00514821	0.969902	-0.0305604	0.0338677
1	ctg7180001658365_697_SCT	2361359	C	T	0.0791241	0.63	0.00429561	0.0074556	1.02828	0.0278863	0.0484004
1	ctg7180001450363_548_SAG	2363817	G	A	0.19949	0.068	0.00647538	0.00505128	1.04291	0.042017	0.0327764
1	ctg7180001560958_499_SGT	2371413	G	T	0.434265	0.76	0.00326758	0.0058156	1.02158	0.0213495	0.0379977
1	ctg7180001929861_4908_SGT	2390161	G	T	0.281703	0.74	-0.000226556	0.00645171	0.998519	-0.0014818	0.0421976
1	ctg7180001929861_5072_SGT	2390325	T	G	0.347931	0.75	-0.000579831	0.00422786	0.996214	-0.00379301	0.0276569
1	ctg7180001928220_1994_SAG	2394429	A	G	0.0196579	0.066	-0.0286346	0.0145033	0.819533	-0.19902	0.100803
1	ctg7180001915692_5302_SCT	2409880	C	T	0.427951	0.68	-0.00077589	0.00406852	0.994938	-0.00507488	0.0266111
1	ctg7180001877130_1152_SCT	2432511	T	C	0.410263	0.2	0.00371417	0.00409234	1.02455	0.024256	0.0267257
1	ctg7180001844912_669_SGT	2432545	G	T	0.23988	0.084	-0.00421585	0.00471839	0.972686	-0.0276939	0.0309951
1	ctg7180001877130_1076_SAG	2432587	G	A	0.456296	0.64	-0.00198421	0.00404717	0.987104	-0.0129799	0.026475
1	ctg7180001877130_1067_SGT	2432596	T	G	0.456744	0.85	-0.0010833	0.00404685	0.99294	-0.00708532	0.0264684
1	ctg7180001466185_333_SCT	2449187	T	C	0.0787211	0.58	0.000637376	0.0107764	1.00417	0.00416339	0.0703923
1	ctg7180001646201_755_SCT	2451342	C	T	0.0641232	0.66	0.00692143	0.00824171	1.04573	0.0447185	0.0532487
1	ctg7180001222425_102_SCG	2452245	C	G	0.331766	0.017	-0.00936967	0.00427551	0.940178	-0.061686	0.0281482
1	ctg7180001222425_206_SCT	2452349	C	T	0.0574512	0.033	-0.0184919	0.00866681	0.88227	-0.125258	0.0587059
1	ctg7180001647179_865_SCT	2456903	C	T	0.0665413	0.65	-0.0107664	0.00808254	0.930718	-0.0717994	0.0539012
1	ctg7180001647179_1007_SCT	2457045	C	T	0.0675712	0.78	-0.00914891	0.00803791	0.940987	-0.0608257	0.0534393
1	ctg7180001911103_6543_SCT	2475308	C	T	0.0132097	0.98	-0.0116783	0.0176699	0.924763	-0.0782178	0.118348
1	ctg7180001443477_2410_SCT	2505822	C	T	0.1072	0.013	-0.0130959	0.0065088	0.916195	-0.0875263	0.0435015
1	ctg7180001443477_2446_SCT	2505858	C	T	0.152158	0.26	-0.00832296	0.00560424	0.946401	-0.0550893	0.0370942
1	ctg7180001360939_1613_SAG	2514777	A	G	0.260433	0.48	-0.00578499	0.00662794	0.962666	-0.0380487	0.0435929
1	ctg7180001360939_1146_SGT	2515244	G	T	0.390247	0.7	-0.000336996	0.00594023	0.997798	-0.00220402	0.0388503
1	ctg7180001897959_8691_SGT	2518230	T	G	0.107872	0.44	0.00332658	0.00649773	1.02187	0.0216391	0.0422671
1	ctg7180001858469_406_SAC	2519263	A	C	0.102096	0.83	0.00489726	0.00664913	1.03228	0.0317746	0.0431412
1	ctg7180001858469_2783_SCT	2521640	T	C	0.154756	0.54	-0.000954009	0.00556552	0.993773	-0.00624688	0.0364432
1	ctg7180001897959_7465_SGT	2532910	G	T	0.283226	0.0023	-0.0104128	0.00446668	0.933559	-0.0687507	0.0294914
1	ctg7180001807428_3713_SAC	2548630	A	C	0.389396	0.059	0.00487436	0.00412779	1.03232	0.0318073	0.0269356
1	ctg7180001807428_2582_SAG	2549761	A	G	0.388322	0.094	0.00414769	0.00412987	1.02744	0.0270732	0.0269569
1	ctg7180001807428_2352_SAG	2549991	A	G	0.118888	0.48	0.00677553	0.00622041	1.04483	0.0438523	0.0402595
1	ctg7180001852442_6354_SCT	2560523	T	C	0.115619	0.088	-0.00932031	0.00634149	0.940005	-0.0618702	0.0420961
1	ctg7180001852442_3275_SGT	2563602	T	G	0.358723	0.59	-0.00165699	0.00419719	0.989213	-0.0108459	0.0274728
1	ctg7180001236948_502_SAG	2575669	G	A	0.0245836	0.041	0.0229371	0.0130004	1.15472	0.143857	0.0815359
1	ctg7180001184846_1647_SAG	2580883	A	G	0.325004	0.081	0.00586248	0.00429831	1.03892	0.0381811	0.027994
1	ctg7180001342161_5761_SCT	2581741	C	T	0.06072	0.17	-0.0125113	0.00842573	0.919673	-0.0837372	0.0563928
1	ctg7180001342161_5112_SGT	2582390	G	T	0.0531524	0.51	-0.00495907	0.00897152	0.967803	-0.0327268	0.0592066
1	ctg7180001342161_944_SAC	2586558	C	A	0.162547	0.83	0.000967006	0.00545922	1.00634	0.00631509	0.0356517
1	ctg7180001835363_9109_SAG	2597223	G	A	0.0247627	0.0022	0.0332661	0.0129544	1.22763	0.205084	0.0798635
1	ctg7180001835363_4877_SAC	2601522	C	A	0.0246731	0.015	0.0261338	0.0130016	1.17706	0.163021	0.0811032
1	ctg7180001250704_265_SAC	2620522	A	C	0.0825721	0.88	-0.000758612	0.00732386	0.995045	-0.00496715	0.0479543
1	ctg7180001907837_8353_SAG	2631010	G	A	0.433011	0.77	0.00120333	0.0040997	1.0079	0.00786629	0.0268002
1	ctg7180001907837_11010_SAG	2633667	G	A	0.32599	0.069	0.00617308	0.0042945	1.04102	0.0401966	0.027964
1	ctg7180001855521_529_SAG	2637335	G	A	0.0509135	0.37	-0.00640051	0.00916869	0.958528	-0.0423567	0.0606757
1	ctg7180001855521_346_SGT	2637518	T	G	0.386799	0.66	0.000116326	0.00603478	1.00076	0.00076064	0.0394606
1	ctg7180001294459_2327_SCT	2638555	T	C	0.0770643	0.14	0.0109254	0.00763813	1.07267	0.070152	0.0490444
1	ctg7180001874462_2498_SGT	2643562	G	T	0.0822586	0.63	0.00716202	0.00733114	1.04737	0.0462782	0.0473709
1	ctg7180001874462_3192_SAC	2644256	C	A	0.45249	0.32	0.00225488	0.00406386	1.01485	0.014739	0.0265633
1	ctg7180001274501_142_SAG	2690326	G	A	0.0573616	0.38	-0.00611831	0.00872782	0.960347	-0.0404609	0.0577178
1	ctg7180001906621_2668_SAG	2709446	G	A	0.117947	0.29	-0.00732495	0.00623849	0.952694	-0.0484614	0.0412735
1	ctg7180001645567_456_SAC	2740359	C	A	0.0176428	0.09	-0.0281732	0.0152845	0.822298	-0.195652	0.106145
1	ctg7180001359411_1084_SCT	2753357	T	C	0.157532	0.74	-0.000560354	0.00553842	0.99634	-0.00366715	0.0362453
1	ctg7180001846174_283_SAG	2774186	A	G	0.0865126	0.43	0.00160403	0.00715781	1.01052	0.0104609	0.0466807
1	ctg7180001224554_5092_SAC	2781033	C	A	0.1042	0.11	0.00754477	0.0065901	1.04996	0.0487534	0.0425844
1	ctg7180001219957_1616_SCT	2793120	T	C	0.343185	0.028	0.00787873	0.00423992	1.05261	0.0512739	0.0275929
1	ctg7180001842361_8572_SCT	2830208	T	C	0.131336	0.17	0.00530057	0.00596144	1.03499	0.0343911	0.038679
1	ctg7180001842361_3826_SAG	2834993	A	G	0.132097	0.065	0.00744447	0.00594741	1.04933	0.048153	0.0384696
1	ctg7180001842361_3401_SGT	2835418	G	T	0.1265	0.019	0.011416	0.0060564	1.07617	0.0734097	0.0389452
1	ctg7180001842361_3351_SCT	2835468	C	T	0.255239	0.0034	0.0104725	0.00461845	1.07015	0.0678	0.0299003
1	ctg7180001842361_1212_SAC	2837607	A	C	0.0244044	0.058	0.0206666	0.0130715	1.13897	0.130122	0.0823016
1	ctg7180001905401_1816_SAG	2844013	A	G	0.0415547	0.44	0.00854769	0.0101112	1.05657	0.0550306	0.0650966
1	ctg7180001905401_5499_SCT	2847547	T	C	0.0201952	0.019	-0.0260032	0.014378	0.835579	-0.17963	0.0993231
1	ctg7180001905401_6520_SCT	2848568	C	T	0.0231506	0.15	-0.0168595	0.0135083	0.892164	-0.114106	0.0914246
1	ctg7180001375683_343_SAG	2875335	A	G	0.168279	0.52	-0.00499976	0.00775474	0.967616	-0.0329199	0.0510596
1	ctg7180001375683_667_SCT	2875659	C	T	0.174861	0.057	-0.00745922	0.00529861	0.95192	-0.0492743	0.0350017
1	ctg7180001644010_4338_SCT	2884091	C	T	0.0380172	0.12	0.0129761	0.0105381	1.08641	0.0828776	0.0673062
1	ctg7180001765448_712_SGT	2890655	G	T	0.499149	0.19	0.00432024	0.00402531	1.02866	0.0282524	0.0263237
1	ctg7180001220184_1461_SCT	2917948	C	T	0.197788	0.76	0.0021731	0.00505407	1.01427	0.0141727	0.032962
1	ctg7180001220184_1779_SAC	2918266	C	A	0.0252552	0.00021	0.0386042	0.0128365	1.26616	0.235988	0.0784697
1	ctg7180001220184_2457_SCT	2918974	T	C	0.175667	0.67	-0.00153148	0.00529147	0.990015	-0.0100351	0.0346725
1	ctg7180001863694_2883_SCT	2939598	C	T	0.0764822	0.0039	0.0209651	0.00757607	1.14168	0.132502	0.0478816
1	ctg7180001863694_2889_SCT	2939604	T	C	0.0774225	0.026	0.0163999	0.00753252	1.11004	0.104392	0.0479475
1	ctg7180001742484_183_SAG	2945381	A	G	0.16698	0.95	-0.00017442	0.00539568	0.99886	-0.00114084	0.0352919
1	ctg7180001742484_483_SGT	2945681	T	G	0.026509	0.011	0.0296237	0.0125368	1.20172	0.183758	0.0777666
1	ctg7180001894941_1258_SAG	2951504	A	G	0.130082	0.98	0.00181596	0.00598582	1.01191	0.0118427	0.0390362
1	ctg7180001894941_5005_SCT	2955251	C	T	0.109395	0.11	0.0071128	0.00645179	1.04707	0.0459996	0.0417247
1	ctg7180001894941_5687_SAG	2955933	A	G	0.10326	0.15	0.00719476	0.0066174	1.04761	0.0465155	0.0427828
1	ctg7180001894941_6018_SAG	2956264	A	G	0.147725	0.74	-0.00107975	0.00567244	0.992953	-0.00707171	0.0371511
1	ctg7180001894941_6877_SAT	2957123	T	A	0.300421	0.84	-0.0010714	0.00439133	0.993012	-0.00701226	0.028741
1	ctg7180001894941_7617_SAG	2957863	A	G	0.232895	0.29	0.00453638	0.00476271	1.02996	0.0295208	0.0309936
1	ctg7180001740002_1311_SAG	2961536	G	A	0.0618843	0.95	-0.00623231	0.00835127	0.959619	-0.0412188	0.055233
1	ctg7180001740002_1315_SCG	2961540	C	G	0.0608544	0.46	-0.010034	0.00841867	0.935346	-0.066839	0.0560789
1	ctg7180001740002_1422_SAG	2961647	A	G	0.0606753	0.87	-0.00713069	0.00844358	0.953858	-0.0472408	0.0559387
1	ctg7180001740002_1575_SAG	2961800	A	G	0.0689593	0.31	-0.0150928	0.0113915	0.903509	-0.10147	0.0765856
1	ctg7180001195217_575_SAC	2964420	A	C	0.0185384	0.96	-0.00729768	0.0149915	0.95273	-0.0484237	0.099476
1	ctg7180001842361_179_SAC	2966324	C	A	0.115081	0.33	0.00410592	0.00630823	1.02704	0.0266793	0.0409894
1	ctg7180001865515_2748_SCT	3001339	T	C	0.299973	0.068	-0.00697117	0.00439179	0.955181	-0.0458545	0.028888
1	ctg7180001865515_2712_SAG	3001375	G	A	0.302391	0.11	-0.00637201	0.00438177	0.958976	-0.041889	0.0288053
1	ctg7180001865515_1839_SCT	3002248	C	T	0.262359	0.026	-0.00910404	0.00457484	0.941688	-0.0600809	0.030191
1	ctg7180001875123_9816_SAC	3007499	C	A	0.380396	0.24	-0.00484364	0.00414689	0.968748	-0.0317512	0.0271839
1	ctg7180001875123_9095_SAG	3008220	A	G	0.380351	0.24	-0.00430539	0.00414679	0.972179	-0.028215	0.0271756
1	ctg7180001875123_9055_SAT	3008260	A	T	0.0556153	0.065	0.0159287	0.00878385	1.10664	0.101328	0.0558769
1	ctg7180001875123_8919_SCG	3008396	C	G	0.42616	0.033	0.00700737	0.00406957	1.0468	0.0457343	0.0265604
1	ctg7180001875123_8410_SCT	3008905	C	T	0.0561526	0.2	0.0109858	0.00875158	1.07301	0.0704681	0.0561368
1	ctg7180001875123_7877_SAC	3009438	C	A	0.108723	0.27	-0.00643212	0.00646553	0.958387	-0.0425032	0.042724
1	ctg7180001875123_7771_SAT	3009544	T	A	0.107559	0.15	-0.0088655	0.00649469	0.942873	-0.0588241	0.0430934
1	ctg7180001875123_7724_SAG	3009591	G	A	0.275166	0.23	-0.00608559	0.00450587	0.960767	-0.0400235	0.029634
1	ctg7180001875123_5911_SAT	3011265	T	A	0.109395	0.64	-0.0013279	0.00650288	0.991336	-0.00870187	0.0426141
1	ctg7180001875123_5730_SCT	3011446	T	C	0.181712	0.77	-0.00420396	0.0074239	0.972735	-0.0276431	0.0488157
1	ctg7180001875123_5246_SGT	3011930	T	G	0.473849	0.063	-0.0103044	0.00576067	0.934744	-0.0674824	0.037726
1	ctg7180001875123_5034_SAG	3012142	G	A	0.379903	0.62	-0.00178203	0.00414655	0.988404	-0.0116634	0.0271392
1	ctg7180001875123_4319_SCT	3012857	T	C	0.381515	0.44	-0.00289891	0.00414396	0.981195	-0.0189837	0.027137
1	ctg7180001875123_3390_SCT	3013786	T	C	0.327199	0.45	-0.00304297	0.00428888	0.980255	-0.019942	0.0281071
1	ctg7180001875123_2318_SCT	3014858	C	T	0.329035	0.31	-0.00486046	0.00428383	0.968609	-0.0318943	0.0281105
1	ctg7180001875123_2075_SAC	3015101	A	C	0.194116	0.31	-0.00339198	0.00509005	0.97797	-0.022276	0.0334276
1	ctg7180001875123_1401_SCT	3015775	T	C	0.328452	0.15	-0.00623661	0.00428555	0.959861	-0.0409668	0.0281508
1	ctg7180001875123_1299_SAC	3015877	C	A	0.109215	0.59	0.00560867	0.00645495	1.03702	0.0363556	0.0418413
1	ctg7180001875123_1167_SAG	3016009	A	G	0.160935	0.0043	-0.0136878	0.00548217	0.912747	-0.0912962	0.0365655
1	ctg7180001875123_932_SCG	3016244	G	C	0.123455	0.026	0.00913138	0.00624009	1.06067	0.058904	0.0402531
1	ctg7180001875123_894_SAC	3016282	A	C	0.474431	0.051	-0.0107103	0.00575205	0.93226	-0.070144	0.0376714
1	ctg7180001875123_389_SAG	3016787	G	A	0.105141	0.038	-0.0104677	0.00660581	0.932719	-0.0696513	0.0439546
1	ctg7180001866929_781_SAT	3026263	A	T	0.111902	0.5	-0.00255574	0.00638511	0.983359	-0.0167808	0.041924
1	ctg7180001498194_2238_SCG	3029908	C	G	0.229939	0.83	-0.000450683	0.00478343	0.997056	-0.00294858	0.0312954
1	ctg7180001861327_3103_SCT	3037647	T	C	0.497448	0.0074	0.00880292	0.00402607	1.05926	0.0575748	0.0263322
1	ctg7180001861327_3226_SGT	3037770	T	G	0.497	0.0085	0.00862292	0.00402645	1.05802	0.0563961	0.026334
1	ctg7180001858352_4672_SAG	3055185	A	G	0.173697	0.11	-0.00781333	0.00531675	0.94967	-0.0516409	0.0351402
1	ctg7180001858352_2289_SAG	3057568	G	A	0.0377933	0.099	0.0121197	0.0106174	1.08061	0.0775234	0.067914
1	ctg7180001858352_2252_SGT	3057605	G	T	0.385098	0.03	0.0134463	0.00599706	1.09137	0.0874338	0.0389956
1	ctg7180001858352_1581_SAG	3058276	A	G	0.0201952	0.92	-0.00623113	0.0145623	0.959584	-0.0412551	0.0964141
1	ctg7180001858352_1448_SAG	3058409	G	A	0.148128	0.89	-0.00412251	0.00566756	0.973244	-0.0271199	0.0372841
1	ctg7180001934731_1484_SAC	3079561	C	A	0.0315243	0.13	0.0172614	0.0115245	1.11559	0.109384	0.0730299
1	ctg7180001934731_2160_SCT	3080238	C	T	0.0266882	0.76	-0.00545872	0.0125065	0.964564	-0.0360795	0.0826619
1	ctg7180001934731_3167_SAG	3081245	A	G	0.0920652	0.0014	0.018317	0.00741013	1.12341	0.116371	0.0470777
1	ctg7180001934731_5147_SCT	3083225	T	C	0.0228372	0.0072	0.029685	0.0135243	1.20207	0.184042	0.0838482
1	ctg7180001934731_5563_SAG	3083641	A	G	0.351155	0.03	0.00791476	0.00421801	1.05287	0.0515205	0.0274568
1	ctg7180001328535_1723_SAG	3086290	A	G	0.466953	0.32	-0.00236479	0.0040354	0.98465	-0.0154691	0.0263973
1	ctg7180001892979_910_SCT	3090015	T	C	0.200519	0.7	0.00102107	0.00502983	1.00669	0.00666871	0.0328503
1	ctg7180001490840_573_SCT	3099056	T	C	0.0192101	0.69	0.00481742	0.0151059	1.0317	0.0312101	0.0978651
1	ctg7180001196979_7959_SAG	3120954	A	G	0.0747358	0.15	0.008992	0.0107341	1.05962	0.0579146	0.069135
1	ctg7180001849869_4026_SGT	3172320	T	G	0.184399	0.36	0.00339536	0.00519095	1.02235	0.0221074	0.0337985
1	ctg7180001259336_446_SGT	3184846	T	G	0.0546749	0.69	-0.00451077	0.0088528	0.970695	-0.0297425	0.0583724
1	ctg7180001259336_374_SGT	3184918	T	G	0.0553466	0.79	-0.00297668	0.00880013	0.980619	-0.0195713	0.0578599
1	ctg7180001837568_2200_SAC	3213184	A	C	0.0188519	0.99	-0.0065116	0.01495	0.957779	-0.0431381	0.0990409
1	ctg7180001837568_1614_SCT	3213770	C	T	0.205669	0.1	0.00865107	0.00717816	1.0576	0.0560049	0.0464697
1	ctg7180001837568_1544_SCT	3213840	T	C	0.192728	0.6	0.00119063	0.0051058	1.0078	0.00777424	0.0333384
1	ctg7180001837568_1540_SGT	3213844	T	G	0.192191	0.57	0.00160964	0.00510756	1.01056	0.0105047	0.0333325
1	ctg7180001837568_1394_SCT	3213990	T	C	0.193847	0.5	0.00178546	0.00509054	1.01172	0.0116497	0.0332145
1	ctg7180001837568_1212_SAG	3214172	A	G	0.0241358	0.014	0.0255744	0.0131175	1.17313	0.159673	0.0818989
1	ctg7180001837568_915_SCT	3214469	T	C	0.0341662	0.049	-0.0166702	0.0110807	0.893426	-0.112691	0.0749061
1	ctg7180001837568_655_SGT	3214729	G	T	0.17804	0.33	0.0036853	0.00526242	1.02427	0.0239842	0.0342482
1	ctg7180001837568_615_SGT	3214769	G	T	0.0327781	0.26	-0.00832948	0.011301	0.946144	-0.0553601	0.0751097
1	ctg7180001821298_5358_SAG	3223512	A	G	0.0335841	0.26	-0.00933703	0.0111692	0.939714	-0.06218	0.0743813
1	ctg7180001709185_890_SCT	3224542	T	C	0.0332259	0.062	-0.0144591	0.0112272	0.907282	-0.0973017	0.0755528
1	ctg7180001709185_878_SAG	3224554	G	A	0.0335841	0.28	-0.00816338	0.0111692	0.947208	-0.0542367	0.0742071
1	ctg7180001334206_3824_SAT	3227583	T	A	0.306153	0.88	0.000334424	0.00436701	1.00219	0.00218629	0.0285493
1	ctg7180001821987_2812_SCT	3258988	T	C	0.172219	0.26	0.00684428	0.00533268	1.04536	0.0443581	0.0345613
1	ctg7180001821987_3214_SAG	3259390	A	G	0.153546	0.91	-0.00118057	0.00558196	0.992297	-0.00773293	0.0365628
1	ctg7180001386888_717_SCG	3262941	C	G	0.155517	0.62	0.00122976	0.0055539	1.00806	0.00802785	0.0362558
1	ctg7180001386888_1159_SCT	3263383	T	C	0.216595	0.4	0.000582194	0.00488843	1.00381	0.00380454	0.0319451
1	ctg7180001386888_1167_SCG	3263391	C	G	0.217759	0.37	0.000851436	0.00487895	1.00558	0.00556229	0.0318734
1	ctg7180001386888_1286_SAG	3263510	G	A	0.0499731	0.11	0.0155491	0.00924368	1.104	0.0989407	0.0588186
1	ctg7180001386888_1439_SGT	3263663	T	G	0.158338	0.055	0.00997175	0.00551571	1.06645	0.0643367	0.0355868
1	ctg7180001386888_1608_SAT	3263832	A	T	0.26312	0.48	0.00262334	0.00457348	1.01726	0.0171117	0.0298322
1	ctg7180001386888_1665_SCT	3263889	T	C	0.263523	0.5	0.0024948	0.00659383	1.01641	0.0162753	0.043016
1	ctg7180001386888_1877_SAG	3264101	A	G	0.259045	0.72	0.0015257	0.00461476	1.01001	0.00996204	0.030132
1	ctg7180001386888_2152_SGT	3264376	T	G	0.120321	0.76	0.000343785	0.00625078	1.00225	0.00224689	0.0408535
1	ctg7180001386888_3843_SAC	3266067	A	C	0.296033	0.64	0.00154517	0.00627492	1.01014	0.0100913	0.0409808
1	ctg7180001386888_4189_SCT	3266413	T	C	0.19228	0.3	0.0056357	0.0060064	1.03728	0.0365985	0.0390059
1	ctg7180001386888_4437_SCG	3266661	C	G	0.296033	0.64	0.00154517	0.00627492	1.01014	0.0100913	0.0409808
1	ctg7180001846914_11471_SCT	3290952	C	T	0.414831	0.086	-0.00593576	0.00408786	0.961847	-0.0389003	0.02679
1	ctg7180001846914_10082_SCG	3292341	G	C	0.427637	0.45	-0.00323561	0.0040702	0.979043	-0.0211794	0.0266423
1	ctg7180001846914_9864_SAC	3292559	C	A	0.0557944	0.067	-0.0149275	0.00876683	0.904467	-0.100409	0.0589697
1	ctg7180001846914_8911_SAT	3293512	A	T	0.0628694	0.039	0.0116585	0.00829624	1.07758	0.0747212	0.0531719
1	ctg7180001846914_8708_SAG	3293715	A	G	0.347528	0.084	-0.00526625	0.0042288	0.966037	-0.0345536	0.0277466
1	ctg7180001846914_8387_SAG	3294036	G	A	0.348872	0.17	-0.00421301	0.00422499	0.972755	-0.0276232	0.0277018
1	ctg7180001846914_5023_SAC	3298345	C	A	0.242029	0.0034	-0.0113612	0.00470228	0.927533	-0.0752268	0.0311356
1	ctg7180001846914_4744_SGT	3298624	G	T	0.287346	0.033	-0.00673494	0.00444978	0.95666	-0.044307	0.0292737
1	ctg7180001846914_4494_SAG	3298874	G	A	0.288823	0.039	-0.00684729	0.00444273	0.955951	-0.0450489	0.0292291
1	ctg7180001846914_4339_SCT	3299029	C	T	0.288734	0.012	-0.00824258	0.00444411	0.947149	-0.0542986	0.0292759
1	ctg7180001846914_4249_SGT	3299119	T	G	0.288689	0.047	-0.00653553	0.00444408	0.957925	-0.0429857	0.0292298
1	ctg7180001846914_1246_SAC	3302122	A	C	0.220133	0.4	-0.00208666	0.00485708	0.986415	-0.0136779	0.0318378
1	ctg7180001846914_992_SAG	3302376	A	G	0.331094	0.067	0.00607838	0.00427705	1.04038	0.0395874	0.0278557
1	ctg7180001846914_935_SGT	3302433	T	G	0.0588841	0.51	-0.0122808	0.00856678	0.921119	-0.0821658	0.0573168
1	ctg7180001846914_918_SGT	3302450	T	G	0.0582124	0.98	-0.0073442	0.00860086	0.952487	-0.0486784	0.0570077
1	ctg7180001846914_822_SAG	3302546	G	A	0.0176428	0.44	0.00083491	0.0153043	1.00547	0.00545073	0.0999144
1	ctg7180001846914_655_SCG	3302713	G	C	0.210819	0.73	-0.00294927	0.00495525	0.980832	-0.0193538	0.0325175
1	ctg7180001846914_319_SCT	3303049	T	C	0.468252	0.18	-0.00654465	0.00572272	0.958065	-0.0428397	0.0374595
1	ctg7180001846914_174_SAC	3303194	A	C	0.0592871	0.48	-0.0113393	0.00863918	0.927069	-0.0757277	0.0576954
1	ctg7180001745209_1688_SAC	3303956	A	C	0.49691	0.39	-0.00294667	0.00402718	0.980914	-0.0192702	0.0263364
1	ctg7180001745209_148_SAC	3305496	A	C	0.199848	0.04	-0.00794091	0.00503581	0.948903	-0.0524486	0.0332608
1	ctg7180001230599_1361_SAC	3307054	C	A	0.198728	0.012	-0.00953603	0.00504682	0.938833	-0.0631178	0.0334043
1	ctg7180001688226_2842_SCT	3317188	T	C	0.270374	0.02	-0.00833734	0.00453248	0.946521	-0.0549622	0.0298794
1	ctg7180001688226_3179_SAG	3317525	A	G	0.348916	0.36	-0.00239349	0.00422716	0.984447	-0.015675	0.0276837
1	ctg7180001688226_3585_SAG	3317931	A	G	0.024494	0.015	-0.0252328	0.0130604	0.840363	-0.173922	0.0900212
1	ctg7180001466185_1467_SAC	3351570	A	C	0.063362	0.35	0.0102596	0.00827075	1.06813	0.0659109	0.0531339
1	ctg7180001466185_1481_SGT	3351584	G	T	0.0747358	0.64	-0.000464667	0.00769823	0.996964	-0.00304101	0.050381
1	ctg7180001466185_1608_SCT	3351711	C	T	0.0626903	0.77	0.00665452	0.00831048	1.04395	0.043012	0.0537154
1	ctg7180001866480_1339_SAC	3363071	A	C	0.155338	0.99	0.0017634	0.00555746	1.01157	0.0115029	0.0362521
1	ctg7180001866480_1273_SCT	3363137	T	C	0.109932	0.76	-0.00410448	0.0064394	0.973344	-0.027018	0.0423877
1	ctg7180001866480_920_SAC	3363490	C	A	0.0331811	0.023	-0.0191237	0.0112384	0.878133	-0.129958	0.076372
1	ctg7180001866480_848_SAG	3363562	G	A	0.154084	0.75	0.000394728	0.00557591	1.00258	0.00257978	0.0364418
1	ctg7180001866480_382_SCT	3364028	T	C	0.0800645	0.4	0.000474309	0.00742111	1.0031	0.0030991	0.0484889
1	ctg7180001653628_1247_SAG	3367375	G	A	0.175309	0.64	0.00122669	0.00529656	1.00804	0.00800864	0.0345794
1	ctg7180001689792_1010_SAG	3388468	G	A	0.0482268	0.0044	0.0235715	0.00939893	1.15951	0.147998	0.059013
1	ctg7180001819386_134_SAG	3389712	G	A	0.0530181	0.93	0.00376908	0.00898024	1.02478	0.02448	0.0583263
1	ctg7180001831966_167_SCT	3413184	T	C	0.0981103	0.092	0.0081202	0.00681734	1.05381	0.0524149	0.0440051
1	ctg7180001912006_3996_SAG	3422093	G	A	0.087856	0.92	0.00259033	0.0101044	1.01701	0.0168658	0.0657902
1	ctg7180001822842_768_SCT	3429371	C	T	0.0857514	0.98	0.000266554	0.0102048	1.00174	0.00174227	0.0667014
1	ctg7180001817108_3907_SAG	3453919	G	A	0.173249	0.34	-0.00428276	0.00532636	0.972225	-0.0281684	0.0350323
1	ctg7180001817108_2805_SCT	3455021	T	C	0.152785	0.46	-0.00383222	0.00559867	0.975117	-0.0251977	0.0368125
1	ctg7180001817108_2077_SAG	3455749	G	A	0.248746	0.79	2.53002e-06	0.00465729	1.00002	1.65443e-05	0.0304549
1	ctg7180001817108_1950_SAC	3455876	C	A	0.25009	0.8	6.94211e-06	0.00464892	1.00005	4.53956e-05	0.0304001
1	ctg7180001817108_182_SAC	3457644	A	C	0.0978864	0.14	0.00711111	0.00677141	1.04705	0.0459736	0.0437774
1	ctg7180001865332_4516_SAC	3490417	C	A	0.0417338	0.87	0.00438942	0.0100676	1.02888	0.0284719	0.0653034
1	ctg7180001812841_13774_SCT	3491938	C	T	0.0355544	0.24	0.00959073	0.0108664	1.06356	0.0616173	0.0698131
1	ctg7180001812841_12553_SAG	3493159	G	A	0.0159413	0.99	-0.0070565	0.0160657	0.954275	-0.0468039	0.106559
1	ctg7180001812841_12365_SAG	3493347	G	A	0.0231954	0.0058	0.0303632	0.013368	1.20689	0.188043	0.0827897
1	ctg7180001812841_12146_SAC	3493566	C	A	0.0231059	0.025	0.0267545	0.0133933	1.18139	0.166692	0.0834459
1	ctg7180001812841_7265_SAG	3498218	G	A	0.323795	0.00037	-0.0120747	0.00430094	0.923401	-0.0796918	0.0283858
1	ctg7180001812841_6506_SGT	3498976	G	T	0.0197474	0.11	-0.0250565	0.0144878	0.841368	-0.172727	0.0998714
1	ctg7180001812841_6342_SCT	3499140	C	T	0.183772	0.2	0.00469004	0.00519703	1.03096	0.0304873	0.033783
1	ctg7180001812841_5528_SCT	3499954	C	T	0.347752	3.6e-06	-0.0153952	0.00422628	0.903273	-0.101731	0.0279271
1	ctg7180001812841_5007_SAC	3500475	A	C	0.1831	0.3	0.00398339	0.00520403	1.02626	0.0259164	0.033858
1	ctg7180001188302_1829_SAT	3505524	A	T	0.326437	0.00057	-0.0114859	0.00429167	0.927039	-0.0757601	0.0283075
1	ctg7180001188302_1719_SCG	3505634	G	C	0.327064	0.0003	-0.0122018	0.00428999	0.922631	-0.0805257	0.0283118
1	ctg7180001188302_1571_SCG	3505782	G	C	0.326751	0.00041	-0.0117754	0.00429083	0.925255	-0.0776864	0.0283081
1	ctg7180001711109_88_SAG	3511874	G	A	0.319362	9.9e-05	-0.0129124	0.00431812	0.918238	-0.0852989	0.0285254
1	ctg7180001643955_1473_SCT	3512142	T	C	0.321288	0.00028	-0.012259	0.00430927	0.922258	-0.0809305	0.0284486
1	ctg7180001870899_3579_SAG	3522182	A	G	0.417159	0.0014	-0.0115308	0.00408155	0.927063	-0.0757332	0.0268072
1	ctg7180001870899_3722_SGT	3522325	T	G	0.100708	0.38	-0.000304387	0.00670045	0.998011	-0.00199144	0.0438374
1	ctg7180001870899_4064_SCT	3522667	C	T	0.321333	0.00026	-0.0123282	0.00430977	0.921832	-0.0813918	0.0284535
1	ctg7180001265880_957_SGT	3553652	G	T	0.391591	0.22	0.00425144	0.00412343	1.02814	0.0277508	0.0269152
1	ctg7180001682960_956_SAG	3555040	G	A	0.391814	0.38	0.00304193	0.00412321	1.02006	0.0198659	0.0269273
1	ctg7180001927837_6014_SCT	3591396	T	C	0.0564213	0.051	0.0164544	0.00872823	1.11025	0.104586	0.0554778
1	ctg7180001577939_1315_SGT	3605823	T	G	0.19022	0.82	0.000825692	0.00512919	1.00541	0.00539377	0.033506
1	ctg7180001503104_1580_SGT	3608625	G	T	0.326034	0.049	-0.00615334	0.00429326	0.960386	-0.0404198	0.0282014
1	ctg7180001503104_1649_SCT	3608694	T	C	0.34623	0.14	-0.0040346	0.00423021	0.973895	-0.0264515	0.027734
1	ctg7180001914785_3708_SCT	3633732	T	C	0.187892	0.69	-0.00211696	0.00515425	0.986215	-0.0138809	0.0337963
1	ctg7180001914785_3594_SAC	3633846	A	C	0.240686	0.97	0.00116872	0.00471007	1.00766	0.00763312	0.0307623
1	ctg7180001833500_4935_SAC	3642557	C	A	0.0216729	0.23	0.0111881	0.0138481	1.07426	0.0716306	0.088661
1	ctg7180001793886_1050_SAG	3661185	A	G	0.137068	0.29	-0.00563399	0.00585246	0.963526	-0.0371557	0.0385965
1	ctg7180001793886_1071_SAG	3661206	G	A	0.481909	0.09	-0.00552238	0.00402884	0.964514	-0.0361307	0.0263591
1	ctg7180001793886_1299_SAG	3661434	A	G	0.0395845	0.064	0.016891	0.0103322	1.11312	0.107164	0.0655518
1	ctg7180001793886_3972_SCT	3664107	T	C	0.224476	0.22	-0.00365454	0.00482423	0.976288	-0.0239974	0.0316782
1	ctg7180001823329_8168_SAC	3689371	A	C	0.192235	0.55	0.000910219	0.00524469	1.00596	0.00594535	0.0342572
1	ctg7180001823329_5915_SGT	3691624	G	T	0.261419	0.22	0.00402802	0.00656365	1.02659	0.0262389	0.0427562
1	ctg7180001823329_5672_SAG	3691867	A	G	0.260165	0.24	0.00378815	0.00656427	1.02499	0.0246814	0.042769
1	ctg7180001916219_4440_SCT	3742608	T	C	0.18834	0.62	-0.00045833	0.00514651	0.997006	-0.00299887	0.0336738
1	ctg7180001631891_1009_SAG	3754728	A	G	0.0874978	0.81	-0.000442949	0.00712524	0.997105	-0.0028987	0.0466282
1	ctg7180001875836_2196_SAG	3764817	A	G	0.093319	0.63	0.00277503	0.00691948	1.01823	0.0180639	0.0450421
1	ctg7180001875836_7420_SCT	3770041	T	C	0.133217	0.064	0.010677	0.00592443	1.07117	0.0687496	0.0381476
1	ctg7180001742970_797_SAG	3777127	A	G	0.124351	0.012	0.0114281	0.00610231	1.07625	0.0734791	0.0392359
1	ctg7180001656959_537_SCT	3799148	C	T	0.168771	0.16	-0.00709312	0.0053779	0.95424	-0.0468404	0.0355137
1	ctg7180001797037_3139_SAC	3823734	C	A	0.162457	0.61	0.00170255	0.00545683	1.01117	0.0111074	0.0356004
1	ctg7180001660923_1763_SCT	3831946	C	T	0.446176	0.5	0.0024255	0.00404976	1.01598	0.0158528	0.0264687
1	ctg7180001876989_1909_SAC	3835371	A	C	0.108857	0.71	-0.00396743	0.00646128	0.974227	-0.0261105	0.042523
1	ctg7180001876989_621_SAC	3836659	C	A	0.428802	0.14	0.00666669	0.00569718	1.04448	0.0435176	0.037189
1	ctg7180001876989_268_SGT	3837012	T	G	0.117589	0.72	-0.00326376	0.00629858	0.978776	-0.0214524	0.0413999
1	ctg7180001475905_485_SCT	3839299	T	C	0.0422264	0.062	0.0175722	0.0100085	1.11782	0.111376	0.0634361
1	ctg7180001475905_293_SCT	3839491	T	C	0.0478238	0.53	0.00721905	0.00943883	1.0477	0.0465957	0.0609234
1	ctg7180001475905_236_SCT	3839548	T	C	0.0428981	0.15	0.0132233	0.00994139	1.08811	0.0844416	0.0634839
1	ctg7180001475905_223_SCT	3839561	T	C	0.283539	0.095	-0.0066301	0.00446593	0.95732	-0.0436176	0.0293801
1	ctg7180001870198_1454_SCT	3888730	T	C	0.188787	0.043	-0.0080887	0.00514408	0.947949	-0.0534547	0.033995
1	ctg7180001870198_1858_SCT	3889134	T	C	0.122739	0.14	0.00627076	0.00613283	1.04146	0.0406199	0.0397265
1	ctg7180001870198_1879_SCT	3889155	C	T	0.117186	0.15	0.00667663	0.00626212	1.04416	0.0432166	0.0405336
1	ctg7180001870198_3832_SGT	3891108	T	G	0.440758	0.18	0.00508073	0.00405461	1.03374	0.0331863	0.0264839
1	ctg7180001933736_1371_SAG	3901982	A	G	0.223581	0.2	-0.00694842	0.00483172	0.95523	-0.0458036	0.0318505
1	ctg7180001831695_940_SGT	3904580	G	T	0.0126276	0.66	0.00969227	0.0180857	1.06418	0.062203	0.11607
1	ctg7180001831695_3931_SAC	3907571	C	A	0.315422	0.24	-0.0080805	0.00627664	0.948213	-0.0531758	0.041305
1	ctg7180001838011_2117_SAG	3945291	G	A	0.250403	0.82	-7.29944e-06	0.00464781	0.999952	-4.7733e-05	0.0303933
1	ctg7180001238110_549_SAG	3964822	A	G	0.0537346	0.12	0.0126587	0.00893142	1.08433	0.0809595	0.0571215
1	ctg7180001238110_386_SAC	3964985	A	C	0.442146	0.58	-0.00167433	0.00405272	0.989107	-0.0109532	0.0265123
1	ctg7180001363587_1493_SCT	3970760	T	C	0.021449	0.17	0.0195838	0.0139563	1.13146	0.123509	0.0880179
1	ctg7180001802493_9046_SGT	3989906	T	G	0.101737	0.36	0.00872771	0.00666605	1.0579	0.0562902	0.0429933
1	ctg7180001802493_8744_SAG	3990208	G	A	0.100976	0.21	0.0102816	0.00668093	1.06839	0.0661522	0.0429854
1	ctg7180001802493_7891_SGT	3991061	T	G	0.0532868	0.92	0.00300302	0.00896283	1.01972	0.0195313	0.0582931
1	ctg7180001802493_3623_SAG	3995329	G	A	0.378515	0.022	-0.00903035	0.00427229	0.942392	-0.059334	0.0280711
1	ctg7180001802493_219_SAG	3998733	G	A	0.106932	0.38	0.0089374	0.00936655	1.05933	0.0576347	0.0604022
1	ctg7180001197885_1812_SCT	4007625	C	T	0.227611	0.082	-0.00529197	0.00481781	0.965786	-0.0348133	0.0316941
1	ctg7180001828452_57_SGT	4013523	T	G	0.0260613	0.0036	0.0313052	0.0128239	1.21366	0.193644	0.0793244
1	ctg7180001848565_1717_SAG	4022294	A	G	0.060317	0.49	0.00707319	0.00857309	1.04674	0.0456823	0.0553694
1	ctg7180001848565_1898_SCT	4022475	C	T	0.323975	0.16	-0.00643963	0.00626794	0.958571	-0.0423119	0.0411838
1	ctg7180001848565_2642_SGT	4023219	T	G	0.421234	0.89	-0.00136751	0.00414851	0.991093	-0.00894643	0.0271401
1	ctg7180001530496_50_SGT	4042793	T	G	0.429384	0.68	-0.00172281	0.0057847	0.988792	-0.0112715	0.0378466
1	ctg7180001716539_88_SGT	4047905	G	T	0.426876	0.29	-0.00511993	0.00408519	0.967021	-0.0335346	0.0267573
1	ctg7180001866439_222_SAG	4062444	A	G	0.314437	0.79	-0.00362537	0.00433662	0.976507	-0.0237734	0.0284374
1	ctg7180001866439_709_SAG	4062931	A	G	0.111992	0.34	0.00659279	0.00638863	1.0436	0.0426734	0.0413519
1	ctg7180001866439_801_SGT	4063023	T	G	0.0822586	0.095	0.0126475	0.00732678	1.08438	0.081006	0.0469273
1	ctg7180001866439_2805_SGT	4065574	T	G	0.0861096	0.16	0.010256	0.00717602	1.06817	0.0659498	0.0461444
1	ctg7180001250913_481_SGT	4079683	T	G	0.444653	0.56	-0.00314387	0.00405149	0.979636	-0.0205738	0.0265133
1	ctg7180001456020_2557_SCT	4081148	C	T	0.382993	0.26	-0.00624421	0.00414032	0.959868	-0.0409599	0.0271591
1	ctg7180001456020_2068_SAG	4081637	G	A	0.448236	0.69	-0.00244663	0.00404834	0.98412	-0.0160076	0.0264872
1	ctg7180001432745_1167_SGT	4088361	T	G	0.100931	0.0011	0.0203543	0.00668142	1.13771	0.129015	0.0423501
1	ctg7180001549368_409_SCT	4091447	T	C	0.0813183	0.21	-0.00670538	0.00737082	0.956607	-0.0443626	0.0487652
1	ctg7180001863242_1373_SAG	4098432	A	G	0.0713326	0.063	0.0121596	0.00782994	1.08101	0.0778999	0.0501621
1	ctg7180001863242_2683_SCT	4099742	T	C	0.0450475	0.012	0.0214529	0.0097219	1.14468	0.135125	0.0612349
1	ctg7180001842477_938_SCT	4131218	T	C	0.0440176	0.37	-0.0108347	0.00982226	0.930217	-0.0723376	0.0655781
1	ctg7180001842477_915_SCT	4131241	C	T	0.0450475	0.54	-0.0091327	0.0097219	0.941042	-0.0607679	0.0646884
1	ctg7180001196070_1488_SAC	4133216	C	A	0.0450922	0.32	-0.011525	0.00970967	0.925846	-0.0770478	0.0649118
1	ctg7180001196070_1208_SCT	4133496	T	C	0.045137	0.21	-0.0132517	0.0097076	0.91494	-0.0888963	0.0651214
1	ctg7180001873137_3281_SCT	4139894	C	T	0.0530629	0.36	-0.00894413	0.00900278	0.94226	-0.0594736	0.0598636
1	ctg7180001873137_2580_SCT	4140595	T	C	0.406636	0.0059	0.0113312	0.00409778	1.07661	0.0738126	0.0266934
1	ctg7180001873137_2545_SCT	4140630	T	C	0.0471073	0.35	-0.0114496	0.00951165	0.92633	-0.0765249	0.0635724
1	ctg7180001873137_1034_SCT	4142141	T	C	0.441295	0.012	-0.00717401	0.00405482	0.954086	-0.0470017	0.0265658
1	ctg7180001873137_970_SGT	4142205	T	G	0.0298675	0.03	0.0231219	0.0118348	1.15609	0.14504	0.0742376
1	ctg7180001873137_707_SCT	4142468	T	C	0.205938	0.59	-0.00130214	0.00497833	0.991508	-0.00852833	0.0326055
1	ctg7180001440143_494_SAC	4143506	A	C	0.0700788	0.0071	0.0207286	0.00788368	1.13995	0.130986	0.0498177
1	ctg7180001440143_533_SAC	4143545	A	C	0.0286136	0.012	0.0272312	0.0120743	1.18486	0.169625	0.0752116
1	ctg7180001440143_650_SAC	4143662	A	C	0.399203	0.0068	-0.00860351	0.0041101	0.94509	-0.0564747	0.0269793
1	ctg7180001440143_1244_SGT	4144256	G	T	0.0702579	0.0033	0.0222148	0.00787438	1.15034	0.140056	0.0496452
1	ctg7180001863974_2966_SCT	4153178	T	C	0.0507792	0.077	0.0165194	0.00916952	1.11065	0.10495	0.0582549
1	ctg7180001863974_3187_SCT	4153399	T	C	0.0103887	0.23	0.0186918	0.0199323	1.12521	0.117972	0.125801
1	ctg7180001863974_3323_SGT	4153535	T	G	0.42419	0.99	-0.00131388	0.00410644	0.991442	-0.00859529	0.026864
1	ctg7180001863974_3352_SAC	4153564	A	C	0.420428	0.37	0.00318452	0.00591764	1.02102	0.0208035	0.0386582
1	ctg7180001863974_4180_SGT	4154392	G	T	0.3229	0.25	0.00305156	0.00442635	1.02011	0.0199116	0.0288822
1	ctg7180001905453_1758_SAG	4162252	A	G	0.179518	0.2	-0.00548803	0.00536982	0.964495	-0.0361504	0.0353717
1	ctg7180001905453_53_SAG	4163957	A	G	0.289987	0.57	0.00440076	0.00644913	1.02909	0.0286715	0.0420169
1	ctg7180001475890_330_SAG	4168290	A	G	0.0165682	0.96	0.00728928	0.0169192	1.04812	0.0470001	0.109092
1	ctg7180001734953_112_SAC	4176837	A	C	0.0899606	0.79	0.000526847	0.00708411	1.00345	0.00344214	0.0462838
1	ctg7180001930419_5507_SAT	4199172	T	A	0.118485	0.51	0.00315429	0.00634146	1.02074	0.0205267	0.0412673
1	ctg7180001903384_7671	4263174	G	A	0.404218	0.21	0.0078951	0.00587959	1.05283	0.0514805	0.0383383
1	ctg7180001888333_2181_SGT	4269201	T	G	0.448325	0.001	-0.0103468	0.00404716	0.934416	-0.0678337	0.0265332
1	ctg7180001596170_695_SGT	4272863	T	G	0.0176428	0.46	-0.00910388	0.0153842	0.941166	-0.0606355	0.102465
1	ctg7180001933414_1540_SCT	4278120	T	C	0.342916	0.2	0.00449793	0.00424114	1.02976	0.0293306	0.0276561
1	ctg7180001933414_2140_SCT	4278720	T	C	0.0604514	0.42	0.00740162	0.00845657	1.04894	0.0477766	0.0545862
1	ctg7180001916719_6318_SCT	4296743	C	T	0.233342	0.067	0.00421165	0.00476132	1.0278	0.0274171	0.0309954
1	ctg7180001890967_974_SAC	4299983	C	A	0.426428	0.0061	-0.00724154	0.00407223	0.953643	-0.0474659	0.0266921
1	ctg7180001890967_1041_SAC	4300050	A	C	0.0699893	0.97	0.0017978	0.00789378	1.01179	0.0117194	0.0514576
1	ctg7180001890967_4058_SAG	4303567	A	G	0.302481	0.12	0.00372492	0.00438326	1.02458	0.0242864	0.0285788
1	ctg7180001890967_4276_SCT	4303785	C	T	0.250761	0.069	0.0066185	0.00464837	1.04394	0.0429975	0.0301984
1	ctg7180001890967_5086_SAG	4304595	G	A	0.301764	0.12	0.00389637	0.00438622	1.02573	0.0254006	0.028594
1	ctg7180001890967_5213_SGT	4304722	G	T	0.301451	0.17	0.00323986	0.00438728	1.02136	0.0211315	0.0286154
1	ctg7180001890967_5413_SCG	4304922	C	G	0.30257	0.13	0.00363857	0.0043829	1.02401	0.0237251	0.0285784
1	ctg7180001890967_5472_SCG	4304981	G	C	0.300958	0.14	0.0038372	0.00438956	1.02533	0.0250157	0.0286167
1	ctg7180001890967_5518_SGT	4305027	G	T	0.302212	0.26	0.00238973	0.00438484	1.01572	0.0155972	0.0286189
1	ctg7180001890967_5522_SGT	4305031	G	T	0.301137	0.21	0.00295877	0.00438881	1.01949	0.0193024	0.0286316
1	ctg7180001890967_5631_SCT	4305140	T	C	0.0128515	0.22	0.0282376	0.025431	1.1916	0.175298	0.157875
1	ctg7180001890967_5851_SAT	4305360	T	A	0.299839	0.18	0.00332558	0.00439447	1.02193	0.0216887	0.0286598
1	ctg7180001747176_999_SAG	4306858	A	G	0.301854	0.097	0.00426881	0.00438585	1.02821	0.0278206	0.0285834
1	ctg7180001747176_1067_SCT	4306926	C	T	0.29957	0.17	0.00341679	0.00439559	1.02253	0.0222819	0.0286649
1	ctg7180001747176_1147_SAG	4307006	A	G	0.301406	0.2	0.00308904	0.0043877	1.02035	0.0201502	0.0286215
1	ctg7180001346010_2119_SAG	4321897	A	G	0.328676	0.12	0.00569881	0.00428807	1.03782	0.0371223	0.0279327
1	ctg7180001346010_2405_SAG	4322183	G	A	0.493955	0.32	0.00416966	0.00403029	1.02764	0.0272652	0.0263539
1	ctg7180001902583_2895_SAG	4331923	A	G	0.397412	0.22	0.00503703	0.00411631	1.03342	0.032872	0.0268633
1	ctg7180001902583_2970_SCT	4331998	C	T	0.39786	0.22	0.00522279	0.0041159	1.03467	0.0340822	0.026859
1	ctg7180001902583_3208_SAG	4332236	A	G	0.403323	0.22	0.00504078	0.0041085	1.03345	0.0329004	0.0268155
1	ctg7180001902583_3214_SCT	4332242	T	C	0.403636	0.18	0.00534842	0.00410779	1.03552	0.0349047	0.0268082
1	ctg7180001902583_3447_SGT	4332475	G	T	0.361589	0.97	0.000934895	0.00605697	1.00613	0.00611028	0.0395871
1	ctg7180001902583_6878_SAG	4335906	A	G	0.114365	0.0043	-0.0158774	0.00635359	0.8989	-0.106583	0.042651
1	ctg7180001672231_5281_SAG	4348575	A	G	0.40592	0.6	-0.00233891	0.00410579	0.984808	-0.0153087	0.0268733
1	ctg7180001672231_4490_SCT	4349366	C	T	0.406278	0.77	-0.00150921	0.00410522	0.990174	-0.00987482	0.0268606
1	ctg7180001672231_2918_SAG	4350938	G	A	0.407263	0.52	-0.0026375	0.0041025	0.982883	-0.0172648	0.0268546
1	ctg7180001672231_2716_SAG	4351140	G	A	0.0304048	0.94	0.00317994	0.0117958	1.02088	0.0206693	0.0766715
1	ctg7180001672231_2072_SGT	4351784	T	G	0.0317929	0.38	-0.00447399	0.0115789	0.970921	-0.0295104	0.0763744
1	ctg7180001672231_2069_SCT	4351787	C	T	0.431175	0.72	6.52336e-05	0.00584716	1.00043	0.000426569	0.0382351
1	ctg7180001814905_3432_SGT	4358657	T	G	0.500224	0.17	0.00665301	0.00427333	1.04447	0.0435126	0.0279488
1	ctg7180001814905_2587_SGT	4359802	T	G	0.443847	0.11	0.00382863	0.00574923	1.02533	0.0250156	0.0375645
1	ctg7180001824204_1995_SCT	4373623	T	C	0.178712	0.24	0.00360733	0.00564528	1.02376	0.0234793	0.0367439
1	ctg7180001201309_4061_SCT	4380835	C	T	0.366246	0.69	-0.00247638	0.00597474	0.983915	-0.0162158	0.0391238
1	ctg7180001201309_3954_SGT	4380942	G	T	0.029554	0.0012	0.0319265	0.0120426	1.2182	0.197372	0.0744482
1	ctg7180001201309_3890_SCT	4381006	C	T	0.459968	0.73	-0.00231689	0.00406345	0.984958	-0.0151567	0.0265823
1	ctg7180001201309_3217_SGT	4381679	G	T	0.155606	0.058	0.00588661	0.00562695	1.03892	0.0381831	0.0364988
1	ctg7180001201309_186_SAG	4384710	G	A	0.318915	0.55	-0.00376081	0.00433272	0.975639	-0.0246624	0.0284129
1	ctg7180001689968_661_SAG	4398164	A	G	0.146068	0.035	0.0060404	0.00578108	1.03994	0.0391634	0.037482
1	ctg7180001689968_704_SAT	4398207	T	A	0.406905	0.17	0.00454736	0.00411651	1.03013	0.0296871	0.0268744
1	ctg7180001689968_1737_SGT	4399240	T	G	0.294286	0.081	-0.00745875	0.00631698	0.952094	-0.0490911	0.0415763
1	ctg7180001689968_1909_SAC	4399412	A	C	0.167473	0.21	-0.00508035	0.00540105	0.967099	-0.0334549	0.0355668
1	ctg7180001913926_12184_SGT	4405117	T	G	0.442235	0.064	-0.00460824	0.00405669	0.970281	-0.0301693	0.0265584
1	ctg7180001913926_11307_SAC	4405994	C	A	0.454594	0.18	-0.00350917	0.00404805	0.977299	-0.0229631	0.0264894
1	ctg7180001913926_10338_SAG	4406963	A	G	0.431578	0.14	0.00458828	0.00409983	1.03042	0.0299677	0.0267774
1	ctg7180001913926_10280_SCT	4407021	T	C	0.376545	0.58	0.00366412	0.0058589	1.02421	0.0239175	0.0382439
1	ctg7180001913926_5902_SAG	4411331	G	A	0.378963	0.2	0.0033101	0.0041535	1.02185	0.021611	0.0271174
1	ctg7180001913926_1700_SCT	4414978	C	T	0.330154	0.32	0.00156366	0.00428687	1.01027	0.0102141	0.0280027
1	ctg7180001913926_799_SGT	4415879	G	T	0.0879008	0.88	-0.00341992	0.0079659	0.977757	-0.0224937	0.0523938
1	ctg7180001913925_1847_SGT	4424211	T	G	0.35429	0.0068	-0.0082814	0.00421237	0.94702	-0.0544349	0.0276885
1	ctg7180001235682_1408_SCT	4434297	C	T	0.441429	0.019	-0.00621028	0.00406079	0.96014	-0.0406763	0.0265975
1	ctg7180001235682_1359_SGT	4434346	T	G	0.235178	0.37	0.000483199	0.004754	1.00316	0.0031581	0.0310713
1	ctg7180001235682_1049_SAG	4434656	A	G	0.224028	0.11	-0.00661185	0.00487629	0.957368	-0.0435671	0.0321311
1	ctg7180001235682_1015_SGT	4434690	T	G	0.423921	0.31	-0.00447576	0.00587777	0.971115	-0.0293107	0.0384922
1	ctg7180001235682_962_SGT	4434743	T	G	0.0733029	0.00068	-0.0270348	0.00836733	0.830239	-0.186041	0.0575801
1	ctg7180001847673_141_SAG	4436740	A	G	0.355006	0.13	0.00561712	0.00426945	1.03729	0.0366142	0.0278296
1	ctg7180001847673_291	4436890	G	A	0.411696	0.59	-0.00340783	0.00597605	0.977934	-0.0223128	0.0391283
1	ctg7180001847673_1254_SCT	4437853	T	C	0.34417	0.28	0.00404239	0.00423829	1.02672	0.0263679	0.0276457
1	ctg7180001847673_1488_SAG	4438087	G	A	0.342737	0.19	0.00495459	0.00424209	1.03283	0.0322994	0.0276546
1	ctg7180001847673_1799_SAC	4438398	C	A	0.207191	0.56	-0.00305706	0.00516853	0.980135	-0.0200646	0.033923
1	ctg7180001847673_1977_SAC	4438576	C	A	0.167652	0.029	-0.00958108	0.00539006	0.938476	-0.0634977	0.0357221
1	ctg7180001847673_2501_SAG	4439100	A	G	0.356842	0.39	0.00385406	0.00420455	1.02547	0.0251473	0.0274342
1	ctg7180001847673_6061_SAG	4442748	G	A	0.343185	0.23	0.00446475	0.00424203	1.02954	0.029115	0.0276626
1	ctg7180001847673_6559_SCT	4443246	C	T	0.343498	0.12	0.00562624	0.00424047	1.03734	0.0366638	0.0276333
1	ctg7180001847673_7719_SAG	4444406	A	G	0.0669443	0.74	-0.00511847	0.00806712	0.966785	-0.0337791	0.0532385
1	ctg7180001913924_1032_SAG	4462491	A	G	0.389172	0.69	8.76626e-05	0.00412959	1.00057	0.000573222	0.0270032
1	ctg7180001913924_999_SAC	4462524	C	A	0.223043	0.0062	-0.00967802	0.00483775	0.937998	-0.0640074	0.0319954
1	ctg7180001913924_665_SCT	4462858	T	C	0.026106	0.53	0.0060651	0.0126699	1.03999	0.0392069	0.0819026
1	ctg7180001913924_483_SGT	4463040	T	G	0.390292	0.78	-0.000206761	0.00412608	0.998649	-0.00135218	0.0269838
1	ctg7180001913924_389_SAG	4463134	G	A	0.033002	0.14	-0.0105271	0.0112678	0.932137	-0.0702751	0.0752198
1	ctg7180001821522_11141_SGT	4470760	T	G	0.0745567	0.27	-0.0138496	0.00766415	0.911321	-0.0928602	0.0513874
1	ctg7180001821522_10779_SAG	4471122	A	G	0.361186	0.082	0.00617416	0.00418989	1.04106	0.0402391	0.0273069
1	ctg7180001821522_10472_SAC	4471429	A	C	0.0243149	0.43	-0.00826096	0.0130703	0.946567	-0.0549131	0.0868822
1	ctg7180001821522_10077_SGT	4471824	G	T	0.394636	0.95	-0.00100151	0.0041182	0.993469	-0.00655193	0.0269415
1	ctg7180001821522_9898_SCT	4472003	T	C	0.360872	0.15	0.00526762	0.00419048	1.03494	0.0343469	0.0273236
1	ctg7180001821522_9252_SAG	4472649	A	G	0.354111	0.9	0.00151421	0.00420831	1.00994	0.00989292	0.0274945
1	ctg7180001821522_9145_SGT	4472756	G	T	0.286316	0.055	-0.00860254	0.00445236	0.944884	-0.0566936	0.0293425
1	ctg7180001821522_9025_SCT	4472876	C	T	0.322989	0.58	0.00268378	0.00430418	1.01767	0.0175164	0.0280923
1	ctg7180001821522_8936_SCT	4472965	T	C	0.355812	0.81	-0.00127202	0.00420377	0.99171	-0.00832428	0.0275101
1	ctg7180001821522_7836_SAG	4474065	A	G	0.0547645	0.77	0.00103638	0.00887289	1.00679	0.00676442	0.0579131
1	ctg7180001821522_7389_SGT	4474512	T	G	0.0166577	0.47	0.00664488	0.0157436	1.04383	0.0428976	0.101636
1	ESTV_15992_330	4477015	G	A	0.033405	0.1	-0.0124139	0.0111981	0.920179	-0.0831874	0.0750402
1	ctg7180001311597_889_SGT	4483638	G	T	0.0344797	0.028	-0.018233	0.0110357	0.883682	-0.123658	0.0748454
1	ctg7180001219459_69_SCT	4488865	T	C	0.308884	0.43	-0.00315895	0.00435647	0.979504	-0.0207087	0.0285592
1	ctg7180001219459_895_SCT	4491295	T	C	0.0731238	0.61	-0.00904769	0.00773041	0.941643	-0.0601289	0.0513746
1	ctg7180001219459_2100	4492500	A	G	0.0771091	0.98	-0.00564902	0.0075909	0.96338	-0.0373076	0.0501323
1	ctg7180001219459_2403	4492803	A	G	0.128291	0.29	-0.00852352	0.00880634	0.945084	-0.0564811	0.0583553
1	ctg7180001219459_2674_SAG	4493075	G	A	0.238178	0.042	-0.00955349	0.00472703	0.938815	-0.0631366	0.0312398
1	ctg7180001219459_3754_SCT	4494155	T	C	0.0714222	0.0057	0.0211358	0.0078201	1.14281	0.133489	0.0493902
1	ctg7180001334275_723_SCT	4497001	C	T	0.3572	0.26	-0.00286392	0.00420074	0.981415	-0.0187596	0.0275162
1	ctg7180001334275_5120_SAC	4501398	A	C	0.10935	0.038	-0.0112946	0.0064522	0.927516	-0.0752455	0.0429851
1	ctg7180001883994_1158_SGT	4517049	G	T	0.272434	0.86	0.000766428	0.00457475	1.00502	0.00500829	0.0298941
1	ctg7180001574072_131_SAG	4523457	G	A	0.169756	0.6	0.00164872	0.00767516	1.01082	0.0107576	0.0500789
1	ctg7180001293035_218_SCT	4524902	C	T	0.132232	0.08	0.00918438	0.00594775	1.06105	0.0592606	0.0383768
1	ctg7180001605255_826_SCT	4527020	C	T	0.112305	0.57	0.00343991	0.00637723	1.02263	0.0223737	0.0414784
1	ctg7180001605255_1034_SAC	4527228	C	A	0.111231	0.8	0.00202081	0.00640558	1.01326	0.0131725	0.0417544
1	ctg7180001817793_1760_SCG	4530210	G	C	0.388232	0.92	-0.000166108	0.00413004	0.998914	-0.0010863	0.0270093
1	ctg7180001817793_1838_SCT	4530288	T	C	0.405248	0.97	-0.000181291	0.00409981	0.998815	-0.00118558	0.0268114
1	ctg7180001817793_2885_SAG	4531335	G	A	0.386396	0.56	-0.00241306	0.00413384	0.984327	-0.0157975	0.0270629
1	ctg7180001817793_8981_SGT	4537592	G	T	0.108096	0.066	0.00736063	0.00648198	1.04873	0.0475825	0.0419025
1	ctg7180001817793_9126_SCT	4537737	T	C	0.30969	0.018	-0.0074059	0.00435333	0.95245	-0.0487182	0.0286375
1	ctg7180001817793_9192_SCT	4537803	T	C	0.311884	0.018	-0.00765063	0.00434558	0.950911	-0.0503349	0.0285904
1	ctg7180001817793_9278_SAG	4537889	G	A	0.312153	0.0092	-0.00821389	0.00434455	0.94737	-0.0540654	0.0285967
1	ctg7180001817793_9995_SGT	4538606	G	T	0.280942	0.08	-0.00590676	0.00447892	0.961909	-0.0388352	0.0294476
1	ctg7180001817793_10349_SAG	4538960	A	G	0.260836	0.008	-0.00969166	0.00458398	0.938003	-0.064002	0.0302718
1	ctg7180001854386_865_SGT	4557567	G	T	0.172354	0.14	0.00658497	0.00532978	1.04362	0.0426918	0.0345541
1	ctg7180001854386_3083_SCT	4559935	T	C	0.151755	0.55	0.00262913	0.00560986	1.01728	0.017129	0.0365486
1	ctg7180001386041_2144_SAG	4564682	G	A	0.332617	0.49	-0.00418145	0.00427211	0.972949	-0.0274233	0.0280179
1	ctg7180001386041_414_SCT	4566412	T	C	0.309511	0.16	-0.00417693	0.00435494	0.972968	-0.0274044	0.0285723
1	ctg7180001866996_512_SAG	4567436	A	G	0.486253	0.21	0.00448667	0.00402682	1.02977	0.029334	0.0263275
1	ctg7180001866996_525_SCT	4567449	C	T	0.494895	0.29	-0.00272315	0.00402569	0.982349	-0.0178087	0.026327
1	ctg7180001866996_566_SGT	4567490	T	G	0.185832	0.74	0.00143531	0.00517467	1.00941	0.00936866	0.0337765
1	ctg7180001866996_1635_SCT	4568559	T	C	0.139889	0.63	0.00300692	0.00580207	1.01977	0.0195771	0.0377755
1	ctg7180001866996_2786_SAC	4569710	A	C	0.139396	0.73	0.00255795	0.00581228	1.0168	0.0166647	0.0378663
1	ctg7180001866996_3810_SAC	4571003	C	A	0.172667	0.064	-0.00806769	0.00532719	0.948055	-0.0533429	0.0352229
1	ctg7180001866996_4076_SAG	4571269	A	G	0.270643	0.7	-0.00175125	0.00453209	0.988595	-0.0114707	0.0296852
1	ctg7180001866996_4170_SAG	4571363	A	G	0.163308	0.23	-0.00549721	0.00544581	0.964424	-0.0362246	0.0358859
1	ctg7180001866996_4192_SCT	4571385	T	C	0.16286	0.42	-0.00380938	0.00545183	0.975268	-0.0250427	0.0358401
1	ctg7180001834524_2586_SAC	4583536	C	A	0.0570034	0.51	0.00667151	0.00868073	1.04406	0.043114	0.0560984
1	ctg7180001834524_1564_SGT	4584558	T	G	0.192235	0.76	-0.000621246	0.00510968	0.995943	-0.00406564	0.0334394
1	ctg7180001834524_960_SAG	4585162	A	G	0.174861	0.017	0.0109066	0.00529779	1.07287	0.0703337	0.034164
1	ctg7180001854313_4617_SCT	4640387	T	C	0.109708	0.12	-0.00767392	0.00644147	0.950457	-0.0508124	0.0426518
1	ctg7180001379405_1544_SGT	4657194	G	T	0.0531076	0.049	0.0161657	0.00897309	1.10825	0.102778	0.0570492
1	ctg7180001379405_1820_SCT	4657470	T	C	0.0218521	0.0021	0.0367574	0.0137633	1.25263	0.225248	0.0843411
1	ctg7180001379405_2008_SAG	4657658	A	G	0.0223894	3.5e-05	0.0453037	0.0136009	1.31515	0.273947	0.0822434
1	ctg7180001896979_97_SAG	4658318	A	G	0.274225	0.0034	-0.0100511	0.00451244	0.93579	-0.0663641	0.0297942
1	ctg7180001896979_1257_SCT	4659478	C	T	0.418144	0.62	-0.00211848	0.00408282	0.986232	-0.0138632	0.0267178
1	ctg7180001485273_170_SAC	4678820	A	C	0.154666	0.2	-0.0095991	0.00804294	0.938332	-0.0636516	0.0533327
1	ctg7180001908955_5155_SAC	4695847	C	A	0.110828	0.24	-0.00592597	0.00661049	0.961632	-0.0391238	0.0436431
1	ctg7180001908955_3685_SAG	4697317	A	G	0.107962	0.05	-0.0142936	0.00940056	0.908713	-0.0957261	0.0629568
1	ctg7180001882289_652_SAG	4748606	G	A	0.230073	0.038	-0.0119584	0.00714966	0.923779	-0.0792823	0.0474011
1	ctg7180001882289_3084_SAC	4750957	A	C	0.274001	6.3e-05	-0.0149844	0.0047193	0.905345	-0.0994392	0.0313181
1	ctg7180001882289_4905_SAC	4752778	C	A	0.0297331	0.54	0.00575139	0.0134713	1.0379	0.0372039	0.0871415
1	ctg7180001382682_550_SAG	4796530	A	G	0.39065	0.32	0.00429098	0.00592353	1.0284	0.0280079	0.0386639
1	ctg7180001729686_3444_SCT	4804840	T	C	0.0415547	0.0088	0.0254929	0.0113945	1.17288	0.159463	0.0712746
1	ctg7180001729686_3390_SAC	4804894	C	A	0.280673	0.57	0.00359463	0.00646446	1.02371	0.0234319	0.0421391
1	ctg7180001729686_1850_SGT	4806435	T	G	0.497582	0.88	0.00026859	0.00402842	1.00176	0.00175636	0.0263426
1	ctg7180001729686_1408_SAC	4806877	C	A	0.0208221	0.77	-0.00200353	0.0141623	0.986933	-0.0131532	0.0929754
1	ctg7180001926525_459_SAC	4831148	A	C	0.433324	0.96	-0.00247554	0.00406382	0.983931	-0.0161993	0.0265927
1	ctg7180001926525_456_SCT	4831151	T	C	0.433996	0.98	-0.00221639	0.00406326	0.985602	-0.0145024	0.0265869
1	ctg7180001848992_2107_SCT	4870392	T	C	0.144904	0.064	-0.0119716	0.00819592	0.923387	-0.0797071	0.0545685
1	ctg7180001848992_5807_SCT	4873445	T	C	0.146248	0.0064	-0.0125094	0.00574213	0.920027	-0.0833521	0.0382607
1	ctg7180001863549_3472_SAT	4896908	T	A	0.470446	0.71	-0.00297253	0.00403326	0.980742	-0.0194456	0.0263846
1	ctg7180001863549_3044_SAC	4897336	A	C	0.48688	0.62	-0.000225736	0.00402813	0.998525	-0.00147615	0.0263411
1	ctg7180001904794_653_SAC	4913928	A	C	0.363872	0.008	0.0104511	0.00418563	1.07034	0.0679743	0.0272235
1	ctg7180001904794_1815_SAG	4915090	G	A	0.174279	0.0036	-0.0122239	0.00531262	0.921919	-0.0812978	0.0353328
1	ctg7180001904794_4894_SGT	4918169	G	T	0.313272	0.39	0.00584499	0.0062915	1.03879	0.038057	0.0409643
1	ctg7180001904794_5279_SAG	4918554	A	G	0.244761	0.16	-0.00549794	0.00475382	0.964483	-0.0361629	0.0312684
1	ctg7180001904794_5415_SAG	4918690	A	G	0.015583	0.58	-0.0146091	0.0188463	0.906243	-0.0984482	0.127002
1	ctg7180001904794_5481_SAG	4918756	A	G	0.240193	0.14	-0.00539111	0.00474112	0.965162	-0.0354597	0.0311844
1	ctg7180001904794_7337_SCT	4920879	C	T	0.423697	0.63	-1.61568e-05	0.00411765	0.999894	-0.000105653	0.0269263
1	ctg7180001904794_8066_SAG	4921608	A	G	0.419577	0.67	-0.000579815	0.0041314	0.996215	-0.00379226	0.0270213
1	ctg7180001904794_8975_SGT	4922517	G	T	0.30763	0.58	0.00439086	0.00627335	1.02903	0.0286163	0.0408849
1	ctg7180001904794_9257_SCT	4922799	C	T	0.436325	0.95	-0.00184193	0.00412638	0.988022	-0.0120507	0.0269965
1	ctg7180001904794_9516_SAG	4923058	A	G	0.225909	0.83	0.000990979	0.00507135	1.00649	0.00647308	0.0331261
1	ctg7180001904794_9578_SAG	4923120	A	G	0.291331	0.65	-0.00150993	0.00651301	0.990162	-0.00988653	0.0426451
1	ctg7180001904794_10102_SAG	4923644	A	G	0.0501522	0.21	0.0121349	0.00935665	1.08076	0.077665	0.0598839
1	ctg7180001451965_1895_SCT	4929168	C	T	0.346991	0.58	0.00309869	0.00426251	1.02043	0.0202246	0.0278207
1	ctg7180001451965_125_SCT	4930938	T	C	0.339737	0.09	0.00762168	0.00428615	1.05085	0.0496031	0.027895
1	ctg7180001842178_299_SCT	4932924	C	T	0.270061	0.24	0.0101312	0.00652195	1.06785	0.0656507	0.0422626
1	ctg7180001842178_287_SCT	4932936	C	T	0.472103	0.15	0.00351003	0.00404799	1.02321	0.0229447	0.0264613
1	ctg7180001882237_1710_SCT	4998298	C	T	0.0928264	0.055	-0.010003	0.00697596	0.935625	-0.0665403	0.0464043
1	ctg7180001910782_459_SAG	5025319	A	G	0.168592	0.29	-0.000394217	0.00538622	0.997424	-0.00257924	0.0352404
1	ctg7180001910782_9885_SGT	5034130	T	G	0.261687	0.86	-0.00207052	0.00458687	0.986525	-0.0135671	0.0300554
1	ctg7180001899725_606_SAG	5049159	G	A	0.0338975	0.094	-0.0125685	0.011239	0.919203	-0.0842479	0.0753361
1	ctg7180001882017_2448_SCT	5051581	T	C	0.149069	0.011	0.0132064	0.00808216	1.08851	0.0848096	0.0519025
1	ctg7180001882017_2241_SAG	5051788	G	A	0.0836468	0.27	0.00361826	0.0106	1.0238	0.0235173	0.068896
1	ctg7180001607758_2210_SCG	5081253	C	G	0.0776016	0.43	0.00520213	0.00756971	1.03429	0.0337192	0.0490653
1	ctg7180001607758_2250_SCT	5081293	T	C	0.175802	0.11	-0.00545367	0.00530674	0.964712	-0.0359254	0.0349575
1	ctg7180001317657_234_SGT	5117909	T	G	0.488268	0.52	0.00166264	0.00576152	1.01093	0.0108716	0.0376732
1	ctg7180001317657_160_SAC	5117983	A	C	0.456565	0.09	0.00880362	0.00416522	1.05918	0.0574951	0.0272024
1	GCR_cBin630_Ctg1_411	5122011	A	G	0.139038	0.52	0.00570001	0.00838265	1.03766	0.0369679	0.0543664
1	ctg7180001347819_568_SAG	5131423	G	A	0.497716	0.017	0.00992659	0.00403004	1.06708	0.0649289	0.0263601
1	ctg7180001347819_782_SCT	5131637	T	C	0.073482	0.0069	0.016436	0.00773853	1.11025	0.104589	0.0492434
1	ctg7180001366407_907_SGT	5140110	G	T	0.0781838	0.69	0.00285359	0.007507	1.01874	0.0185697	0.0488517
1	ctg7180001366407_389_SCT	5140628	C	T	0.0778255	0.53	0.00454735	0.00751814	1.02995	0.0295074	0.0487847
1	ctg7180001301336_800_SCT	5177007	C	T	0.167741	0.066	-0.00798961	0.0053941	0.948542	-0.0528294	0.0356672
1	ctg7180001300627_563_SCT	5181566	C	T	0.241582	0.0091	0.00657622	0.00478682	1.04364	0.0427141	0.0310915
1	ctg7180001188386_2770_SAG	5185030	A	G	0.457908	0.089	0.00736326	0.00582768	1.04927	0.0480985	0.0380677
1	ctg7180001352150_43_SCT	5192799	C	T	0.0524807	0.00086	0.0262271	0.00944549	1.17827	0.164043	0.059079
1	ctg7180001820343_2739_SGT	5199191	T	G	0.326706	0.82	-7.57369e-05	0.00628187	0.999505	-0.000495287	0.0410807
1	ctg7180001796539_436_SGT	5226769	G	T	0.348692	0.061	0.00795912	0.00424271	1.05317	0.0518038	0.0276147
1	ctg7180001716482_1545_SAG	5231740	G	A	0.335169	0.015	0.00971689	0.00427149	1.06519	0.0631498	0.0277603
1	ctg7180001716482_1313_SAG	5231972	A	G	0.0501522	0.79	-0.00514101	0.0131761	0.966628	-0.0339413	0.0869894
1	ctg7180001825324_363_SGT	5271978	T	G	0.0551675	0.89	0.00333672	0.00883256	1.02193	0.0216892	0.057413
1	ctg7180001465079_794_SGT	5273926	T	G	0.0669891	0.35	0.00691577	0.00808644	1.0457	0.044686	0.0522502
1	ctg7180001891205_554_SGT	5289417	G	T	0.394859	0.13	-0.00357806	0.00412069	0.976838	-0.0234347	0.0269887
1	ctg7180001836926_2243_SAC	5360771	C	A	0.178175	0.094	-0.00737609	0.0052645	0.952453	-0.0487146	0.0347688
1	ctg7180001836926_2212_SCT	5360802	T	C	0.178667	0.1	-0.00717671	0.00525759	0.953721	-0.0473841	0.0347132
1	ctg7180001284853_867_SGT	5401079	G	T	0.301093	0.68	-0.0011124	0.00449235	0.992746	-0.00728082	0.0294031
1	ctg7180001284853_1407_SAG	5401619	G	A	0.285375	0.62	-0.000926451	0.00451745	0.993955	-0.0060632	0.0295646
1	ctg7180001284853_2090_SGT	5402302	T	G	0.0567795	0.063	-0.0120944	0.00872788	0.922288	-0.0808981	0.0583798
1	ctg7180001284853_3451_SCT	5403664	T	C	0.335931	0.033	-0.00540481	0.00432234	0.965147	-0.0354751	0.0283702
1	ctg7180001880248_467_SAG	5422570	A	G	0.162547	0.076	-0.00813644	0.00546012	0.947602	-0.0538209	0.0361176
1	ctg7180001880248_277_SCT	5422760	C	T	0.17822	0.11	-0.00700622	0.00526277	0.954805	-0.0462482	0.0347397
1	ctg7180001878725_1970_SAG	5482502	A	G	0.152069	0.024	-0.0104347	0.00561536	0.933059	-0.0692871	0.0372864
1	ctg7180001878725_2773_SAG	5483305	A	G	0.0238671	0.13	0.0140035	0.0132021	1.09331	0.0892089	0.0841036
1	ctg7180001878725_3016_SAC	5483548	C	A	0.0215834	0.077	-0.0251917	0.0138615	0.840568	-0.173677	0.0955643
1	ctg7180001321909_6071_SGT	5559264	T	G	0.462207	0.58	-0.00249658	0.00403813	0.9838	-0.0163323	0.026417
1	ctg7180001886704_7896_SAT	5578836	T	A	0.122291	0.67	0.00164843	0.00614248	1.01081	0.0107523	0.0400657
1	ctg7180001886704_7751_SCT	5578981	C	T	0.123634	0.66	0.00147781	0.0061137	1.00969	0.00964194	0.0398887
1	ctg7180001886704_7514_SAG	5579218	G	A	0.298898	0.089	-0.00606564	0.00439913	0.960916	-0.039868	0.0289144
1	ctg7180001886704_7316_SAT	5579300	A	T	0.0335393	0.53	-0.0041524	0.0111803	0.973	-0.0273712	0.0736966
1	ctg7180001886704_6235	5580497	G	A	0.119425	0.79	-0.00152929	0.00620564	0.990026	-0.0100242	0.0406768
1	ctg7180001886704_6124	5580608	T	A	0.119783	0.89	-0.000953513	0.00619761	0.993775	-0.00624447	0.0405876
1	ctg7180001886704_5607_SCT	5581123	C	T	0.0341214	0.11	0.0167352	0.0121551	1.11201	0.106165	0.0771097
1	ctg7180001886704_4342_SCT	5582388	C	T	0.394591	0.56	-0.00488497	0.00596781	0.968493	-0.0320138	0.0391102
1	ctg7180001553584_1462_SCT	5588840	T	C	0.0915726	0.7	0.00458716	0.00965874	1.03022	0.0297714	0.0626867
1	ctg7180001571389_1919_SAG	5593232	A	G	0.0356887	0.022	-0.0188253	0.011009	0.880009	-0.127823	0.0747507
1	ctg7180001807047_2939_SCT	5598343	T	C	0.283674	0.68	-0.00023332	0.00646792	0.998475	-0.00152604	0.0423038
1	ctg7180001835243_1907_SAG	5608240	G	A	0.043525	0.002	0.0269777	0.00992086	1.18339	0.16838	0.0619207
1	ctg7180001846494_575_SAG	5630053	A	G	0.0433907	0.0011	0.0287219	0.00993298	1.19574	0.178765	0.0618229
1	ctg7180001934416_640_SCG	5631314	C	G	0.152561	0.043	0.0136216	0.00780917	1.09138	0.087445	0.0501316
1	ctg7180001934416_1861_SCT	5633020	T	C	0.044734	0.0029	0.0262115	0.00982446	1.178	0.16382	0.0614021
1	ctg7180001883430_1438_SCT	5635363	C	T	0.0740193	0.32	0.00909667	0.00770738	1.06033	0.0585772	0.049631
1	ctg7180001824310_562_SAC	5641432	A	C	0.0338975	0.011	-0.0191148	0.0111307	0.878195	-0.129887	0.0756342
1	ctg7180001824310_766_SAC	5641636	A	C	0.0348379	0.2	-0.00944027	0.0109808	0.939059	-0.0628774	0.0731382
1	ctg7180001824310_1018_SAG	5641888	G	A	0.0343453	0.22	-0.00833646	0.0110528	0.946103	-0.0554043	0.0734571
1	ctg7180001824310_1499_SAC	5642369	A	C	0.0330915	0.029	-0.0166818	0.0112531	0.893346	-0.112781	0.0760791
1	ctg7180001824310_2656_SAG	5643526	G	A	0.033002	0.2	-0.00849613	0.0112678	0.94508	-0.0564861	0.0749134
1	ctg7180001858241_3050_SAC	5657665	A	C	0.241223	0.083	-0.00667673	0.00471574	0.956976	-0.0439772	0.0310609
1	ctg7180001347196_741_SAC	5686629	A	C	0.485447	0.046	-0.00501822	0.00402737	0.967705	-0.0328279	0.0263461
1	ctg7180001347196_638_SCT	5686732	T	C	0.384247	0.056	-0.00553693	0.00413933	0.964345	-0.036306	0.0271418
1	ctg7180001924563_1973_SAC	5736887	C	A	0.379142	0.046	0.00858803	0.00414955	1.05753	0.0559371	0.0270276
1	ctg7180001924563_3011_SAG	5737925	A	G	0.305794	0.53	0.00519351	0.00630686	1.0344	0.0338257	0.041077
1	ctg7180001439932_1020_SCG	5757599	C	G	0.269031	0.52	-0.00106015	0.00454116	0.993085	-0.0069395	0.0297254
1	ctg7180001850621_1985_SAG	5780270	A	G	0.0231954	0.057	0.0194748	0.0134078	1.13073	0.122861	0.0845862
1	ctg7180001850621_1892_SAG	5780363	A	G	0.0215386	9.9e-05	0.0437226	0.0138978	1.30342	0.264994	0.0842316
1	ctg7180001850621_1724_SAG	5780531	A	G	0.0911696	0.028	0.0157645	0.00701513	1.10576	0.100534	0.0447372
1	ctg7180001850621_1046_SAC	5781209	A	C	0.107066	0.29	-0.00628538	0.0065362	0.959325	-0.0415253	0.0431824
1	ctg7180001850621_985_SAG	5781270	A	G	0.0742432	0.022	0.0175378	0.0108442	1.11786	0.111412	0.0688898
1	ctg7180001890571_3618_SAC	5810521	A	C	0.104693	0.42	-0.00497242	0.00658346	0.96775	-0.0327812	0.0434022
1	ctg7180001344410_367_SGT	5822889	G	T	0.283718	0.96	-0.00265119	0.00447198	0.982772	-0.0173777	0.0293125
1	ctg7180001344410_1333_SAC	5823855	A	C	0.24991	0.78	-0.0021841	0.00466624	0.985788	-0.0143144	0.0305821
1	ctg7180001530992_2701_SCT	5838008	C	T	0.335483	0.018	0.00943066	0.00426556	1.06322	0.0613009	0.0277269
1	ctg7180001875371_315_SGT	5840967	T	G	0.336468	0.0029	0.0113938	0.00426289	1.07678	0.0739788	0.0276785
1	ctg7180001875371_780_SCT	5841432	T	C	0.0650188	0.25	0.0107497	0.00818528	1.07144	0.0690077	0.0525454
1	ctg7180001875371_2352_SAC	5843169	A	C	0.0183593	0.84	0.00078513	0.0149888	1.00514	0.00512625	0.0978644
1	ctg7180001875371_2511_SCT	5843328	T	C	0.0189862	0.52	0.00417094	0.0148515	1.02742	0.0270552	0.0963355
1	ctg7180001875371_3087_SGT	5843904	T	G	0.224207	0.55	-0.0062491	0.0048419	0.959676	-0.041159	0.0318907
1	ctg7180001875372_5894_SCT	5850198	T	C	0.0444206	0.13	-0.012499	0.0140365	0.919685	-0.0837241	0.094023
1	ctg7180001857896_2453_SAC	5895935	A	C	0.063765	0.17	0.0123663	0.00830742	1.08239	0.0791679	0.0531833
1	ctg7180001857896_2063_SCT	5896325	T	C	0.0678399	0.17	0.0112394	0.0113193	1.07476	0.0721016	0.0726142
1	ctg7180001857896_2013_SCT	5896375	T	C	0.0213147	0.71	0.0036248	0.0139921	1.02382	0.023538	0.0908592
1	ctg7180001857896_1804_SAC	5896584	A	C	0.0647054	0.17	0.0122145	0.00823915	1.08136	0.0782193	0.0527619
1	ctg7180001857896_615_SAC	5897773	C	A	0.0627351	0.57	0.00669846	0.0084193	1.04424	0.0432928	0.0544148
1	ctg7180001897754_7025_SCT	5907543	C	T	0.19631	0.59	0.0020011	0.00737071	1.01314	0.0130535	0.0480803
1	ctg7180001822970_3271_SAG	5911379	G	A	0.0575855	0.78	0.00304057	0.00869883	1.01997	0.0197752	0.0565753
1	ctg7180001862262_7932_SAC	6015160	A	C	0.335841	0.092	0.00686956	0.00427865	1.04574	0.0447235	0.0278557
1	ctg7180001335680_3117_SAG	6025071	A	G	0.18834	0.97	0.000560665	0.00748289	1.00367	0.00366371	0.0488975
1	ctg7180001897754_3200_SCT	6034835	T	C	0.280091	0.012	-0.00927181	0.00452321	0.940675	-0.0611574	0.0298354
1	ctg7180001435354_109_SCT	6037216	T	C	0.440892	0.029	-0.00659597	0.00408674	0.957712	-0.0432078	0.0267708
1	ctg7180001801007_7588_SCT	6039676	T	C	0.485581	0.41	-0.00449469	0.00582339	0.971026	-0.0294016	0.0380932
1	ctg7180001803277_5895_SAG	6043645	G	A	0.458311	0.36	-0.00278176	0.00407295	0.981965	-0.0181996	0.0266472
1	ctg7180001803277_5523_SGT	6044017	T	G	0.420383	0.11	-0.00586655	0.00415782	0.962289	-0.0384405	0.0272441
1	ctg7180001803277_5037_SAC	6044503	A	C	0.439996	0.14	-0.00479708	0.00407485	0.96908	-0.0314086	0.0266798
1	ctg7180001803277_4489_SAG	6045051	A	G	0.341259	0.91	0.00027066	0.00622053	1.00177	0.0017696	0.0406703
1	ctg7180001803277_4029_SGT	6045511	T	G	0.440399	0.15	-0.00477917	0.00408252	0.969194	-0.0312909	0.0267297
1	ctg7180001803277_3994_SAG	6045546	G	A	0.459699	0.43	0.00107124	0.00406771	1.00703	0.00700387	0.0265951
1	ctg7180001803277_3869_SCT	6045671	T	C	0.0565556	0.075	0.0161904	0.00876836	1.10844	0.102954	0.0557576
1	ctg7180001803277_2741_SAG	6046799	G	A	0.436414	0.11	-0.00516659	0.00408646	0.966732	-0.033834	0.0267606
1	ctg7180001274957_861_SCT	6100342	C	T	0.200116	0.9	-0.0030768	0.00740683	0.980006	-0.0201965	0.0486193
1	ctg7180001827122_959_SAG	6106797	A	G	0.472774	0.67	-0.00183382	0.00575253	0.988077	-0.0119943	0.0376251
1	ctg7180001886599_4837_SGT	6128533	T	G	0.247268	0.096	-0.00610481	0.00468897	0.960618	-0.0401787	0.0308603
1	ctg7180001907062_3767_SAC	6190013	A	C	0.0581677	0.097	0.0127265	0.00907911	1.08481	0.0814021	0.0580724
1	ctg7180001888950_7438_SAG	6208192	A	G	0.0893785	0.17	0.0111781	0.00744209	1.07442	0.0717848	0.0477925
1	ctg7180001801007_1406_SGT	6245383	T	G	0.0706162	0.53	0.0067305	0.00786395	1.04447	0.0435068	0.0508336
1	ctg7180001801007_3043_SCT	6246972	C	T	0.0689146	0.61	0.00655323	0.00795616	1.04328	0.0423716	0.0514427
1	ctg7180001801007_3073_SCT	6247002	T	C	0.0710192	0.4	0.00852183	0.00786872	1.05646	0.054922	0.0507128
1	ctg7180001801007_5612_SAG	6249541	A	G	0.451863	0.27	0.00167249	0.00404922	1.01099	0.0109333	0.0264703
1	ctg7180001631738_278_SAG	6274351	A	G	0.0235089	0.031	0.0239619	0.0134188	1.16184	0.150007	0.0840046
1	ctg7180001551677_1638_SCT	6282699	T	C	0.4434	0.043	-0.00626243	0.00405375	0.959813	-0.0410164	0.0265504
1	ctg7180001872370_324_SCT	6285377	T	C	0.0219416	0.021	0.0282195	0.0140317	1.19168	0.175366	0.0871979
1	ctg7180001872370_5250_SCT	6290361	T	C	0.226536	0.83	-0.00099195	0.00691961	0.993527	-0.00649378	0.0452991
1	ctg7180001872370_5420_SAG	6290531	G	A	0.18928	0.98	0.00173528	0.00514759	1.01139	0.0113226	0.0335878
1	ctg7180001807491_725_SCT	6293408	T	C	0.0204191	0.0031	0.0361289	0.0142756	1.24804	0.221576	0.0875514
1	ctg7180001807491_5922_SAC	6298605	A	C	0.190399	0.74	0.000472095	0.00513032	1.00309	0.0030853	0.0335283
1	ctg7180001920141_2394_SAG	6305240	A	G	0.11938	0.55	-0.00292663	0.00620863	0.980958	-0.0192257	0.040786
1	ctg7180001810509_10833_SGT	6310890	T	G	0.182742	0.39	-0.00295015	0.00520798	0.98082	-0.0193661	0.0341876
1	ctg7180001810509_3629_SAG	6317881	A	G	0.126366	7.9e-05	0.0201681	0.00606223	1.1367	0.12813	0.0385138
1	ctg7180001839200_9814_SAC	6330790	A	C	0.0549884	0.46	-0.00560128	0.00883851	0.963668	-0.0370081	0.0583967
1	ctg7180001839200_6266_SCT	6334338	T	C	0.0110604	0.012	0.0451287	0.0195422	1.31316	0.272434	0.117973
1	ctg7180001839200_5583_SCT	6335021	C	T	0.055257	0.78	0.00175797	0.00884486	1.01153	0.0114594	0.0576554
1	ctg7180001839200_5532_SGT	6335072	T	G	0.0684668	3.4e-06	-0.0386569	0.0113669	0.761166	-0.272904	0.0802462
1	ctg7180001839200_2902_SGT	6337702	G	T	0.053645	0.68	-0.00309778	0.00900232	0.979834	-0.0203725	0.0592037
1	ctg7180001839200_2854_SAC	6337750	A	C	0.0531524	0.53	-0.00587019	0.00910209	0.961937	-0.038806	0.0601712
1	ctg7180001839200_1231_SAG	6339373	A	G	0.0538241	0.54	-0.00505209	0.00898394	0.967204	-0.0333461	0.059298
1	ctg7180001890509_5306_SAG	6341391	G	A	0.0273598	0.081	-0.0209595	0.0153096	0.866695	-0.143068	0.104502
1	ctg7180001890509_5259_SAC	6341438	A	C	0.0525255	0.22	-0.00930403	0.00915475	0.939967	-0.0619108	0.0609175
1	ctg7180001890509_5249_SCT	6341448	C	T	0.054048	0.15	-0.0105095	0.00898009	0.932309	-0.0700906	0.0598906
1	ctg7180001890509_4258_SAG	6342439	G	A	0.0701236	0.00015	-0.0325109	0.011252	0.797402	-0.226396	0.0783555
1	ctg7180001890509_3634_SAC	6343063	A	C	0.0544062	0.29	-0.00739681	0.00889665	0.952145	-0.0490376	0.0589809
1	ctg7180001908364_2270_SCT	6383599	C	T	0.05669	0.17	-0.00988537	0.0087197	0.936279	-0.0658417	0.0580777
1	ctg7180001908364_2306_SCT	6383635	T	C	0.201415	0.25	0.00153696	0.00502213	1.01008	0.0100318	0.0327798
1	ctg7180001908364_2357_SAC	6383686	A	C	0.173428	0.015	0.0112146	0.00532084	1.07496	0.0722878	0.0342974
1	ctg7180001930177_3707_SAC	6407155	C	A	0.171503	0.15	-0.00582439	0.00534488	0.962337	-0.0383909	0.0352303
1	ctg7180001930177_3631_SAG	6407231	A	G	0.36029	0.0017	-0.0105652	0.00420279	0.932828	-0.0695342	0.0276604
1	ctg7180001930177_3147_SAG	6407715	A	G	0.254881	0.0082	0.0144713	0.00670177	1.09785	0.0933504	0.0432313
1	ctg7180001760039_1611_SCT	6412450	T	C	0.0296883	0.19	-0.0132544	0.0120588	0.914854	-0.0889911	0.0809637
1	ctg7180001760039_1427_SAG	6412634	A	G	0.19734	0.92	-0.0035155	0.00505839	0.977175	-0.0230897	0.0332234
1	ctg7180001914283_8835_SAG	6418029	G	A	0.407174	0.9	-0.00211296	0.00409883	0.986267	-0.0138284	0.026825
1	ctg7180001914283_8156_SCT	6418442	T	C	0.101917	0.57	-0.00410066	0.009383	0.973365	-0.0269963	0.0617721
1	ctg7180001914283_7556_SCT	6419042	C	T	0.174279	0.0061	0.0127793	0.00531843	1.08569	0.0822191	0.0342176
1	ctg7180001914283_7275_SAC	6419323	A	C	0.173742	0.0042	0.0129976	0.00531828	1.08719	0.083599	0.0342066
1	ctg7180001914283_4097_SAG	6422501	G	A	0.183593	0.28	-0.00367297	0.00520133	0.976155	-0.0241338	0.0341761
1	ctg7180001914283_1420_SCT	6425177	C	T	0.173786	0.024	0.0105269	0.00531317	1.07027	0.0679138	0.0342777
1	ctg7180001506006_379_SCG	6442634	G	C	0.0656009	0.006	0.0204775	0.00813182	1.13815	0.129403	0.0513873
1	GCR_cBin17069_Ctg1_53	6447225	A	G	0.239522	0.62	-0.000665905	0.00471674	0.995652	-0.00435758	0.0308657
1	ctg7180001876601_1388_SGT	6461110	G	T	0.0240014	5.1e-05	0.0420174	0.0131976	1.29102	0.255436	0.080232
1	ctg7180001937479_9657_SGT	6476157	G	T	0.378291	0.53	0.00289866	0.00415078	1.01911	0.0189283	0.0271047
1	ctg7180001937479_7737_SGT	6478077	T	G	0.0291062	0.4	-0.00748749	0.0120273	0.951528	-0.0496862	0.079812
1	ctg7180001937478_30639_SAG	6604888	G	A	0.0655114	0.028	0.0168157	0.00815193	1.11281	0.106884	0.0518153
1	ctg7180001937478_30412_SAC	6605115	A	C	0.184533	0.38	-0.00335108	0.00519142	0.978231	-0.0220091	0.0340961
1	ctg7180001937478_26356_SCT	6609171	T	C	0.226491	0.57	-0.00605782	0.00481112	0.960897	-0.039888	0.031679
1	ctg7180001937478_26141_SAG	6609386	G	A	0.339692	0.0021	-0.0105341	0.00425209	0.932963	-0.0693899	0.0280092
1	ctg7180001937478_25407_SGT	6610120	T	G	0.0140158	0.93	-0.00409007	0.0171868	0.973394	-0.0269659	0.113313
1	ctg7180001937478_24611_SCT	6610916	C	T	0.0138366	0.28	0.0103369	0.01724	1.06851	0.066263	0.110514
1	ctg7180001937478_18491_SAG	6617036	G	A	0.0759448	0.012	0.0174472	0.00760064	1.11724	0.110865	0.0482971
1	ctg7180001937478_18360_SAC	6617167	A	C	0.0644815	0.1	0.0141896	0.00819879	1.0948	0.0905715	0.0523325
1	ctg7180001937478_17684_SAG	6617843	G	A	0.0636307	0.039	0.0166098	0.0082482	1.11137	0.105597	0.0524381
1	ctg7180001937478_13916_SCT	6621611	T	C	0.0807362	0.013	0.0172908	0.00739171	1.11621	0.109935	0.0469964
1	ctg7180001937478_12936_SAG	6622591	G	A	0.445773	0.16	-0.00638486	0.0040503	0.959045	-0.0418171	0.0265271
1	ctg7180001937478_10285_SAC	6625242	A	C	0.182697	0.3	-0.00343147	0.00520809	0.977712	-0.0225401	0.0342101
1	ctg7180001937478_1362_SAG	6634165	A	G	0.382142	0.017	-0.0106073	0.00414738	0.93263	-0.0697469	0.0272705
1	ctg7180001825423_996_SCT	6639338	T	C	0.142217	0.00092	0.0162177	0.00576534	1.10926	0.103694	0.036863
1	ctg7180001825423_1240_SAG	6639582	A	G	0.18328	0.34	-0.00317258	0.00520127	0.979383	-0.0208322	0.0341533
1	ctg7180001825423_2904_SAC	6641246	C	A	0.174727	0.079	-0.0074677	0.00530145	0.951866	-0.0493311	0.035021
1	ctg7180001825423_13267_SCT	6651851	T	C	0.39768	0.0057	0.0117038	0.00411352	1.07918	0.0761989	0.0267815
1	ctg7180001221698_2685_SCT	6664951	T	C	0.476357	0.69	-0.000862229	0.00574825	0.994377	-0.00563879	0.0375923
1	ctg7180001323637_6175_SCT	6674513	C	T	0.428085	0.13	-0.00744954	0.0040719	0.952343	-0.0488304	0.0266906
1	ctg7180001323637_5225_SAT	6675463	A	T	0.152875	0.023	-0.010538	0.00559635	0.932411	-0.0699815	0.0371647
1	ctg7180001323637_2600_SGT	6678088	G	T	0.0265538	0.59	0.00425113	0.012631	1.02796	0.0275747	0.0819301
1	ctg7180001323637_1324_SAC	6679364	A	C	0.0261508	0.45	0.00693386	0.0126987	1.04577	0.0447504	0.0819562
1	ctg7180001348091_705_SAC	6696910	A	C	0.213729	0.5	-0.000489355	0.0049128	0.996803	-0.00320183	0.0321442
1	ctg7180001867124_2764_SCT	6704580	T	C	0.0124933	0.23	0.0167006	0.0181988	1.1116	0.105801	0.115292
1	ctg7180001867124_5337_SAC	6707196	A	C	0.355723	0.00071	-0.0111861	0.00420524	0.928982	-0.0736659	0.0276935
1	ctg7180001867124_5737_SAG	6707596	G	A	0.386531	0.99	-0.00174831	0.00413416	0.988623	-0.011442	0.0270563
1	ctg7180001867124_7318_SAG	6709177	G	A	0.42213	0.081	0.00696396	0.00407579	1.04649	0.0454463	0.0265983
1	ctg7180001867124_11380_SCT	6713239	C	T	0.193668	0.12	-0.00603682	0.00509452	0.961	-0.0397811	0.0335715
1	ctg7180001867124_11430_SAG	6713289	G	A	0.385008	0.88	-0.00212298	0.0041372	0.986199	-0.0138967	0.0270814
1	ctg7180001867124_11436_SCT	6713295	T	C	0.422757	0.1	0.00665826	0.00407573	1.04441	0.0434556	0.0266005
1	ctg7180001867124_12127_SAC	6713986	A	C	0.193713	0.15	-0.00593386	0.0050959	0.961657	-0.0390973	0.0335761
1	ctg7180001867124_12900_SAG	6714759	A	G	0.315019	0.41	0.00193048	0.00617111	1.01269	0.0126057	0.0402961
1	ctg7180001867124_12903_SAC	6714762	A	C	0.190176	0.13	-0.0061823	0.00514577	0.960068	-0.0407511	0.0339187
1	ctg7180001867124_13207_SAC	6715066	C	A	0.239835	0.046	-0.00758271	0.00472131	0.951232	-0.0499972	0.0311303
1	ctg7180001867124_13389_SAC	6715248	C	A	0.385904	0.72	-0.0028636	0.00413463	0.981423	-0.0187512	0.0270741
1	ctg7180001867124_14169_SAG	6716028	G	A	0.193803	0.15	-0.00583669	0.00509281	0.962278	-0.0384521	0.0335514
1	ctg7180001867124_14867_SGT	6716726	G	T	0.386128	0.95	-0.00151971	0.00413555	0.990104	-0.00994481	0.0270626
1	ctg7180001867124_15579_SGT	6717438	G	T	0.385725	0.74	-0.00274644	0.00413616	0.982178	-0.017983	0.0270826
1	ctg7180001867124_20060_SAG	6721919	G	A	0.191788	0.059	-0.00730718	0.00511275	0.95291	-0.0482352	0.0337496
1	ctg7180001918121_7767_SAG	6729159	G	A	0.42213	0.047	0.00786302	0.00408481	1.05264	0.0513013	0.0266508
1	ctg7180001918121_6006_SAC	6730920	A	C	0.330423	5e-05	-0.0208011	0.00627508	0.870902	-0.138226	0.0416988
1	ctg7180001918121_5828_SAG	6731098	A	G	0.148576	0.14	-0.00685697	0.00574457	0.955719	-0.0452916	0.037944
1	ctg7180001918121_5802_SGT	6731124	G	T	0.193623	0.02	-0.00901665	0.00511742	0.942093	-0.0596508	0.0338549
1	ctg7180001918121_750_SGT	6736176	G	T	0.212431	0.31	-0.00331587	0.00494067	0.978467	-0.0217686	0.0324354
1	ctg7180001919721_1495_SAG	6760550	G	A	0.394412	0.011	-0.00818914	0.00412655	0.947666	-0.0537528	0.0270863
1	ctg7180001919721_2783_SCT	6761838	C	T	0.260747	0.96	-0.00162608	0.00651979	0.989406	-0.0106503	0.0427024
1	ctg7180001919721_4573_SAG	6763628	G	A	0.245119	0.9	-0.000544889	0.00492211	0.996441	-0.00356517	0.032205
1	ctg7180001843912_1554_SAG	6766697	A	G	0.0165234	0.36	0.0204567	0.0190408	1.13742	0.128766	0.119854
1	ctg7180001859106_3892_SCT	6785962	C	T	0.243015	0.51	-0.00215166	0.00495848	0.985997	-0.0141022	0.0324983
1	ctg7180001859106_4242_SGT	6786312	T	G	0.244313	0.98	-6.68126e-06	0.00496567	0.999956	-4.36905e-05	0.0324718
1	ctg7180001791167_5954_SAG	6791411	A	G	0.260747	0.96	-0.00127623	0.00651826	0.991679	-0.00835599	0.0426777
1	ctg7180001491378_618_SAG	6839011	G	A	0.0300913	0.22	0.00496996	0.0123402	1.03272	0.0321961	0.0799414
1	ctg7180001924012_1413_SAG	6841084	G	A	0.416174	0.087	-0.00567127	0.00420939	0.96352	-0.0371619	0.0275827
1	ctg7180001924012_1698_SAG	6841369	G	A	0.0257926	0.39	0.00420826	0.0129866	1.02767	0.0272984	0.0842424
1	ctg7180001925483_4709_SAC	6847142	C	A	0.479491	0.024	-0.00999491	0.00591935	0.936658	-0.0654369	0.0387541
1	ctg7180001925483_801_SCG	6851050	G	C	0.208087	0.079	-0.00653109	0.00496601	0.957864	-0.0430492	0.0327331
1	ctg7180001869756_2291_SGT	6860671	T	G	0.446624	0.6	-0.00325565	0.0040512	0.97892	-0.0213053	0.0265115
1	ctg7180001869756_3059_SGT	6861439	G	T	0.153949	0.036	-0.00965467	0.00557838	0.937979	-0.0640272	0.0369943
1	ctg7180001869756_3860_SAG	6862240	G	A	0.0188519	0.92	-0.00212595	0.0148766	0.986137	-0.0139605	0.0976901
1	ctg7180001869756_4015_SGT	6862395	G	T	0.459744	0.27	-0.00537221	0.00403987	0.965446	-0.0351647	0.0264436
1	ctg7180001869756_4399_SAG	6862779	A	G	0.151666	0.02	-0.0106162	0.00561317	0.931916	-0.0705129	0.0372827
1	ctg7180001869756_10811_SAG	6869191	A	G	0.152114	0.026	-0.0101434	0.00560833	0.934893	-0.067323	0.0372232
1	ctg7180001869756_10955_SGT	6869335	T	G	0.153681	0.034	-0.00993483	0.00558333	0.936212	-0.0659136	0.0370432
1	ctg7180001869756_11105_SAG	6869485	A	G	0.153726	0.016	-0.0112711	0.00558218	0.927808	-0.0749303	0.0371104
1	ctg7180001869756_12131_SGT	6870511	G	T	0.0256135	0.064	0.0205007	0.0127946	1.13784	0.129128	0.0805892
1	ctg7180001869756_14597_SCT	6872977	T	C	0.174906	0.2	-0.00544962	0.00530013	0.964737	-0.0358992	0.0349145
1	ctg7180001869756_14755_SAG	6873135	A	G	0.0169264	0.2	-0.0207314	0.0156411	0.867994	-0.141571	0.10681
1	ctg7180001869756_15505_SCT	6873885	T	C	0.15274	0.025	-0.0102154	0.00559692	0.934441	-0.0678065	0.0371505
1	ctg7180001869756_16485_SAG	6874865	G	A	0.174055	0.45	-0.00312051	0.00531076	0.979717	-0.0204913	0.034874
1	ctg7180001869756_16558_SCT	6874938	T	C	0.022479	0.00018	0.0408082	0.0135882	1.28209	0.248494	0.0827427
1	ctg7180001875618_2349_SAC	6884678	A	C	0.0182697	0.097	0.0222189	0.0151004	1.14964	0.139448	0.0947713
1	ctg7180001875618_3913_SAG	6886447	G	A	0.177906	0.39	-0.00373135	0.00526438	0.975777	-0.0245214	0.0345961
1	ctg7180001875618_4200_SGT	6886734	G	T	0.177772	0.34	-0.00400424	0.00526716	0.974019	-0.0263245	0.0346271
1	ctg7180001844798_5234_SAG	6893643	A	G	0.176697	0.12	-0.00688372	0.00527809	0.955583	-0.0454339	0.0348364
1	ctg7180001844798_4967_SAG	6893910	G	A	0.453609	0.0085	0.0106795	0.00404329	1.07221	0.0697231	0.0263974
1	ctg7180001844798_3180_SAC	6895697	A	C	0.0193892	0.4	0.0113133	0.0146884	1.07509	0.0724082	0.0940097
1	ctg7180001844798_2825_SAC	6896052	A	C	0.340005	0.31	-0.00611498	0.00424838	0.960643	-0.0401526	0.027896
1	ctg7180001296933_2201_SAG	6901286	A	G	0.03036	0.51	0.00667155	0.0117546	1.04402	0.0430834	0.0759086
1	ctg7180001296933_2292_SAC	6901377	C	A	0.165547	0.74	-0.00291009	0.00541608	0.981075	-0.0191061	0.035559
1	ctg7180001296933_3378_SAG	6902463	G	A	0.0282106	0.74	0.00530223	0.0121728	1.03492	0.0343259	0.0788051
1	ctg7180001914885_9784_SGT	6908576	T	G	0.0183593	0.037	-0.0285963	0.0150262	0.81974	-0.198768	0.104445
1	ctg7180001914885_9733_SAG	6908627	A	G	0.366335	0.94	-0.00282756	0.00417741	0.981651	-0.0185191	0.0273599
1	ctg7180001914885_8420_SCT	6909940	T	C	0.0176876	0.056	-0.0269892	0.0152754	0.829513	-0.186916	0.105791
1	ctg7180001914885_1515_SGT	6916845	T	G	0.373366	0.017	0.00979798	0.00416163	1.06585	0.0637704	0.0270861
1	ctg7180001875650_1579_SCT	6919292	T	C	0.492208	0.0048	-0.0115027	0.00402561	0.927482	-0.0752817	0.0263464
1	ctg7180001820562_14628_SCT	6923820	T	C	0.0380172	0.4	-0.00759049	0.0105446	0.950881	-0.050366	0.0699678
1	ctg7180001820562_13319_SGT	6925129	T	G	0.0790793	0.26	0.00828129	0.00746557	1.05486	0.0534074	0.0481467
1	ctg7180001820562_11123_SGT	6927325	G	T	0.219371	0.54	-0.00446006	0.00490337	0.971109	-0.0293169	0.0322309
1	ctg7180001820562_9193_SCT	6929255	C	T	0.0474655	0.69	-0.00204651	0.00948679	0.986656	-0.0134335	0.0622721
1	ctg7180001820562_7461_SAC	6930987	C	A	0.0351514	0.4	-0.00783683	0.0109443	0.9493	-0.0520307	0.0726619
1	ctg7180001820562_7174_SCT	6931274	T	C	0.0177772	0.69	0.0057776	0.0152571	1.03807	0.0373612	0.098661
1	ctg7180001820562_930_SCT	6937518	T	C	0.0176428	0.064	-0.0258804	0.0153441	0.836288	-0.178783	0.105997
1	ctg7180001730466_262_SAG	6939478	G	A	0.0180459	0.14	-0.0211177	0.0151256	0.865612	-0.144318	0.103368
1	ctg7180001730466_281_SAG	6939497	G	A	0.0180011	0.37	-0.0139302	0.0151923	0.910534	-0.0937235	0.102215
1	ctg7180001752005_8214_SCT	6953428	C	T	0.0188519	0.36	-0.0144985	0.0148044	0.906957	-0.0976603	0.0997208
1	ctg7180001841858_429_SAG	6954074	A	G	0.0936772	0.15	0.00893693	0.00691307	1.0593	0.0576043	0.0445592
1	ctg7180001841858_536_SAG	6954181	G	A	0.0926921	0.84	0.00225538	0.00694416	1.0148	0.0146937	0.0452408
1	ctg7180001752005_5949_SAG	6955745	G	A	0.152696	0.011	-0.0115006	0.00559614	0.926365	-0.0764865	0.037218
1	ctg7180001752005_5121_SAC	6956573	A	C	0.197295	0.29	-0.0038014	0.00505847	0.975333	-0.0249766	0.033236
1	ctg7180001752005_1302_SAC	6960392	C	A	0.154711	0.067	-0.0085964	0.00556665	0.944672	-0.0569173	0.0368572
1	ctg7180001750254_1219_SCT	6962680	T	C	0.345916	0.54	-0.00440929	0.00423216	0.971499	-0.0289154	0.0277538
1	ctg7180001750254_774_SCT	6963125	T	C	0.218297	0.028	-0.00860706	0.00487589	0.944726	-0.0568604	0.0322113
1	ctg7180001750254_69_SGT	6963830	T	G	0.218655	0.0091	-0.0101177	0.00487173	0.93523	-0.0669633	0.0322432
1	ctg7180001775023_345_SAG	6965845	A	G	0.240417	0.17	-0.0048057	0.00471187	0.968905	-0.0315887	0.0309719
1	ctg7180001827569_388_SCT	6973576	T	C	0.0189414	0.49	-0.0141347	0.0147878	0.90925	-0.0951355	0.0995313
1	ctg7180001827569_453_SAG	6973641	A	G	0.232939	0.00058	-0.0132538	0.00476568	0.915766	-0.0879946	0.0316403
1	ctg7180001827569_480_SGT	6973668	G	T	0.0652875	0.11	-0.00964752	0.00817554	0.937812	-0.0642062	0.0544098
1	ctg7180001827569_575_SAC	6973763	C	A	0.0178667	0.66	-0.0118596	0.0152193	0.923629	-0.0794443	0.10195
1	ctg7180001827569_4608_SCT	6977796	T	C	0.396695	0.0012	0.0125864	0.00411565	1.08537	0.0819172	0.0267863
1	ctg7180001260187_3317_SAC	6982914	A	C	0.0227924	0.93	-0.00774829	0.0135306	0.949847	-0.0514542	0.0898529
1	ctg7180001260187_3358_SCT	6982955	T	C	0.0231059	0.16	-0.0193685	0.0134333	0.876517	-0.131799	0.0914109
1	ctg7180001260187_3579_SAG	6983176	G	A	0.435832	0.55	-0.00378585	0.00406221	0.975522	-0.0247823	0.0265914
1	ctg7180001933118_4633_SAC	6988106	A	C	0.413666	0.011	0.0100473	0.00408765	1.06769	0.0654935	0.0266454
1	ctg7180001933118_3489_SCT	6989250	T	C	0.0176876	1	-0.00611138	0.0152754	0.960352	-0.040455	0.101117
1	ctg7180001933118_3328_SCT	6989411	T	C	0.15377	0.041	-0.00944675	0.00558104	0.939292	-0.0626293	0.0370007
1	ctg7180001933118_3155_SAC	6989584	A	C	0.434623	0.39	-0.00460795	0.00407002	0.970279	-0.0301717	0.0266495
1	ctg7180001933118_3079_SAG	6989660	A	G	0.437175	0.0075	0.0099551	0.00603292	1.06711	0.0649559	0.0393641
1	ctg7180001933118_3067_SCT	6989672	C	T	0.433369	0.55	-0.00397345	0.00409625	0.974323	-0.0260128	0.0268167
1	ctg7180001933118_1451_SGT	6991066	T	G	0.436145	0.66	-0.00335598	0.00411458	0.978274	-0.0219655	0.0269307
1	ctg7180001933118_1405_SAG	6991112	A	G	0.433503	0.59	-0.00378595	0.00411427	0.975521	-0.0247838	0.0269331
1	ctg7180001826000_1408_SCT	6993540	T	C	0.155338	0.053	-0.00871858	0.00559582	0.9439	-0.0577355	0.0370562
1	ctg7180001826000_2579_SAG	6994711	A	G	0.408562	0.95	0.00191941	0.00600767	1.01262	0.0125426	0.0392579
1	ctg7180001826000_3049_SGT	6995181	G	T	0.0237775	0.024	0.0309463	0.016946	1.21104	0.191483	0.104855
1	ctg7180001826000_3243_SAG	6995375	A	G	0.144009	0.88	-0.000119575	0.00616006	0.999218	-0.000782063	0.040289
1	ctg7180001826000_3420_SGT	6995552	G	T	0.409099	0.86	0.0025358	0.00601345	1.0167	0.016567	0.0392873
1	ctg7180001826000_3621_SGT	6995753	G	T	0.395307	0.3	-0.00528833	0.00435331	0.965931	-0.0346632	0.0285345
1	ctg7180001826000_4922_SAC	6997054	C	A	0.306242	0.68	-0.00288415	0.00639629	0.981274	-0.0189037	0.0419234
1	ctg7180001826000_5030_SAG	6997162	G	A	0.161293	0.042	-0.00943437	0.00556947	0.939387	-0.0625277	0.0369125
1	ctg7180001826000_6160_SGT	6998234	G	T	0.425757	0.0043	0.0111383	0.00414498	1.07533	0.0726231	0.0270258
1	ctg7180001826000_6383_SCT	6998457	C	T	0.428399	0.0019	0.0120064	0.00415998	1.08142	0.0782783	0.0271219
1	ctg7180001826000_6454_SCT	6998528	C	T	0.426697	0.0081	0.0106503	0.00415145	1.07192	0.0694517	0.027072
1	ctg7180001826000_6630_SAG	6998704	G	A	0.151666	0.046	-0.00943785	0.00567987	0.939343	-0.0625745	0.0376585
1	ctg7180001826000_10900_SAG	7002975	G	A	0.463237	0.00073	0.0110619	0.00596258	1.07492	0.0722479	0.038943
1	ctg7180001826000_14267_SGT	7006342	T	G	0.260702	0.039	-0.00725691	0.00460108	0.953323	-0.0478018	0.0303077
1	ctg7180001826000_15204_SCT	7007279	C	T	0.219282	0.012	-0.00941819	0.00487181	0.939621	-0.0622784	0.0322152
1	ctg7180001826000_17343_SAC	7009418	A	C	0.397457	0.0018	0.0122395	0.00412261	1.08293	0.0796716	0.0268357
1	ctg7180001799434_23944_SGT	7014386	T	G	0.0726312	0.57	-0.00299159	0.00778174	0.980526	-0.0196657	0.0511546
1	ctg7180001799434_23896_SAG	7014434	A	G	0.0722282	0.54	-0.00320115	0.00780582	0.979169	-0.0210513	0.0513323
1	ctg7180001799434_23464_SAC	7014866	C	A	0.0733029	0.78	-0.00147785	0.00775244	0.990358	-0.00968895	0.0508259
1	ctg7180001799434_21939_SAG	7016391	G	A	0.071467	0.93	0.000918592	0.00786987	1.00602	0.00599727	0.0513805
1	ctg7180001799434_19944_SAC	7018386	C	A	0.381247	0.38	-0.00536725	0.00414767	0.965419	-0.0351926	0.0271959
1	ctg7180001799434_19172_SCT	7019158	C	T	0.355275	0.72	-0.0024149	0.00607849	0.98431	-0.0158144	0.0398061
1	ctg7180001799434_19142_SAG	7019188	A	G	0.450654	0.33	-0.00532859	0.00412942	0.965716	-0.0348857	0.0270349
1	ctg7180001799434_18024_SCT	7020306	T	C	0.383396	0.84	-0.00353655	0.00429469	0.9771	-0.0231662	0.0281324
1	ctg7180001799434_13437_SCT	7024456	C	T	0.288241	0.97	-0.00428726	0.00646244	0.972251	-0.0281413	0.042419
1	ctg7180001799434_13206_SAG	7024687	A	G	0.0739298	0.82	0.00143701	0.00778892	1.00942	0.0093736	0.0508071
1	ctg7180001799434_12960_SAG	7024933	G	A	0.0741985	0.76	-0.00152819	0.00781489	0.99003	-0.0100198	0.0512396
1	ctg7180001799434_12543_SAG	7025350	A	G	0.0723178	0.93	-1.52172e-05	0.00787319	0.9999	-9.95112e-05	0.0514859
1	ctg7180001799434_8632_SAG	7029261	G	A	0.410398	0.088	-0.00755228	0.00412725	0.951674	-0.0495327	0.0270691
1	ctg7180001799434_7704_SAG	7030187	G	A	0.392352	0.0055	0.00931562	0.00611361	1.06257	0.0606876	0.0398277
1	ctg7180001799434_6097_SAG	7031794	G	A	0.072676	0.88	-0.000278481	0.00778865	0.99818	-0.00182193	0.0509564
1	ctg7180001799434_5783_SAC	7032108	C	A	0.0725416	0.58	-0.00285403	0.00780454	0.981418	-0.0187569	0.0512921
1	ctg7180001799434_5664_SCT	7032227	T	C	0.0719595	0.45	-0.00425596	0.00784593	0.972349	-0.0280406	0.0516933
1	ctg7180001799434_5381_SAG	7032510	A	G	0.402069	0.0046	0.0115151	0.00411482	1.07787	0.0749904	0.0267972
1	ctg7180001799434_1404_SCT	7036487	C	T	0.398666	0.0022	0.0122069	0.00411989	1.08271	0.079465	0.0268198
1	ctg7180001799434_988_SGT	7036903	T	G	0.0728999	0.55	-0.00292251	0.00776324	0.980974	-0.0192092	0.0510266
1	ctg7180001799434_914_SAG	7036977	G	A	0.0707953	0.72	-0.00160306	0.00790888	0.989543	-0.0105123	0.0518638
1	ctg7180001799434_690_SCT	7037201	C	T	0.0723625	0.8	-0.000520984	0.00780039	0.996596	-0.00340993	0.0510548
1	ctg7180001885830_12585_SAC	7047273	A	C	0.490238	0.0089	0.0142726	0.00573219	1.09784	0.0933464	0.03749
1	ctg7180001885830_12493_SGT	7047365	G	T	0.1801	0.5	-0.00268819	0.00526603	0.982514	-0.0176409	0.0345577
1	ctg7180001885830_10326_SAG	7049532	A	G	0.341886	0.5	-0.00514953	0.00424441	0.966775	-0.0337892	0.0278502
1	ctg7180001885830_5198_SAG	7054660	A	G	0.176608	0.24	-0.00462717	0.00527915	0.970013	-0.0304461	0.034736
1	ctg7180001885830_5137_SGT	7054721	G	T	0.444922	0.011	0.010482	0.00405493	1.0708	0.0684099	0.0264641
1	ctg7180001885830_4939_SAC	7054919	C	A	0.164159	0.21	0.000799249	0.00543754	1.00523	0.00522076	0.0355185
1	ctg7180001885830_3613_SGT	7056245	T	G	0.0716013	0.72	-0.00155931	0.00782161	0.989828	-0.0102246	0.0512873
1	ctg7180001885830_3546_SAG	7056312	G	A	0.194071	0.11	-0.00657283	0.00509232	0.957583	-0.043343	0.0335801
1	ctg7180001885830_3087_SAG	7056771	A	G	0.0719595	0.41	-0.00431413	0.00780092	0.971973	-0.0284268	0.0514021
1	ctg7180001885830_560_SAG	7059298	G	A	0.195325	0.24	-0.00512363	0.00507843	0.96684	-0.0337222	0.0334247
1	ctg7180001885830_536_SCT	7059322	T	C	0.264419	0.11	-0.00554499	0.00456546	0.964199	-0.036458	0.0300176
1	ctg7180001885830_487_SCT	7059371	T	C	0.1934	0.17	-0.00571395	0.00509574	0.963062	-0.0376379	0.0335657
1	ctg7180001401259_60_SGT	7063169	T	G	0.195594	0.21	-0.00543603	0.00507362	0.96484	-0.0357925	0.0334063
1	ctg7180001631799_1338_SAG	7067537	G	A	0.0712431	0.82	-0.000412657	0.00782918	0.997303	-0.0027004	0.0512337
1	ctg7180001631799_1568_SAC	7067767	C	A	0.0731238	0.62	-0.00245566	0.00773297	0.984002	-0.0161273	0.0507856
1	ctg7180001631799_2236_SAC	7068435	A	C	0.0732133	0.42	-0.00445774	0.00773116	0.971047	-0.02938	0.0509544
1	ctg7180001193531_1381_SAC	7074350	A	C	0.0933638	0.29	0.00691447	0.00692257	1.04573	0.0447105	0.0447629
1	ctg7180001193531_1375_SGT	7074356	T	G	0.0918861	0.47	0.00588571	0.00696962	1.03886	0.0381195	0.0451396
1	ctg7180001193531_1165_SAG	7074566	G	A	0.09211	0.95	0.00230178	0.00696106	1.01511	0.0149948	0.0453472
1	ctg7180001193531_1009_SAG	7074722	A	G	0.157756	0.12	-0.00773686	0.00552352	0.95013	-0.051156	0.0365214
1	ctg7180001193531_984_SAG	7074747	G	A	0.0927369	0.38	0.00643094	0.00693987	1.04249	0.0416152	0.0449086
1	ctg7180001193531_403_SAG	7075328	A	G	0.0925578	0.78	0.00348029	0.0069459	1.02289	0.0226286	0.0451617
1	ctg7180001193531_178_SCT	7075553	C	T	0.0920652	0.96	0.00197091	0.00696352	1.01293	0.0128463	0.0453879
1	ctg7180001756667_4765_SCT	7081715	T	C	0.136128	0.0018	0.0218416	0.00826972	1.14863	0.138568	0.0524649
1	ctg7180001756667_5272_SAG	7082222	A	G	0.0926473	0.54	0.00552419	0.00698208	1.03645	0.0357995	0.0452473
1	ctg7180001756667_5695_SCT	7082644	C	T	0.0208669	0.92	0.00767907	0.0198157	1.05073	0.0494835	0.127691
1	ctg7180001884374_229_SGT	7088217	T	G	0.0919756	0.71	0.00443436	0.00696657	1.02921	0.028787	0.0452256
1	ctg7180001884374_654_SCT	7088642	T	C	0.092513	0.93	0.00256335	0.0069502	1.01683	0.0166916	0.0452573
1	ctg7180001884374_1256_SGT	7089244	G	T	0.0910801	0.84	0.00339608	0.00699921	1.02233	0.0220836	0.0455137
1	ctg7180001884374_5482_SCT	7093470	C	T	0.0634068	0.043	0.0165633	0.00826958	1.11105	0.105308	0.0525772
1	ctg7180001593303_803_SAC	7097861	A	C	0.158383	0.13	-0.00755498	0.00551276	0.951287	-0.0499391	0.0364399
1	ctg7180001593303_690_SAG	7097974	A	G	0.164652	0.18	-0.00642507	0.00542789	0.958493	-0.0423934	0.0358139
1	ctg7180001593303_588_SGT	7098076	T	G	0.163398	0.12	-0.00721361	0.0054455	0.953466	-0.0476518	0.035972
1	ctg7180001299270_52_SAC	7103153	C	A	0.249418	0.22	-0.00415535	0.00465393	0.973079	-0.0272902	0.0305646
1	ctg7180001299270_141_SAC	7103242	C	A	0.248478	0.15	-0.00474361	0.0046601	0.969307	-0.0311736	0.0306248
1	ctg7180001299270_1422_SCT	7104523	C	T	0.0931847	0.57	0.00418152	0.00693408	1.02753	0.0271573	0.0450341
1	ctg7180001362858_242_SCT	7106532	T	C	0.158293	0.026	-0.0102458	0.00551403	0.934265	-0.0679954	0.0365934
1	ctg7180001362858_743_SCT	7107033	C	T	0.156323	0.069	-0.00821961	0.0055422	0.947063	-0.0543891	0.0366727
1	ctg7180001362858_1142_SAC	7107432	A	C	0.0935877	0.66	0.00373132	0.00691422	1.02455	0.0242512	0.0449381
1	ctg7180001362858_1779_SGT	7108069	G	T	0.0926921	0.82	0.00258995	0.00694416	1.01701	0.0168642	0.0452161
1	ctg7180001554282_2117_SAC	7110915	A	C	0.158069	0.046	-0.00914666	0.00552045	0.941197	-0.0606026	0.0365766
1	ctg7180001922774_2198_SAG	7120416	G	A	0.157845	0.028	-0.00979527	0.00552411	0.937102	-0.0649631	0.0366364
1	ctg7180001922774_2245_SAG	7120463	G	A	0.0916174	0.31	0.00708224	0.00698634	1.04684	0.0457808	0.0451609
1	ctg7180001922774_8639_SGT	7126857	G	T	0.0921548	0.58	0.00469886	0.00696982	1.03096	0.0304911	0.0452275
1	ctg7180001922774_8766_SCT	7126984	T	C	0.0868261	0.34	0.00641859	0.00716128	1.0424	0.0415298	0.0463352
1	ctg7180001895488_5510_SAC	7130184	A	C	0.0930056	0.51	0.00514841	0.00694378	1.03395	0.0333846	0.0450266
1	ctg7180001895488_1759_SGT	7133975	T	G	0.0874082	0.26	0.0072898	0.00715068	1.04823	0.0471011	0.0462022
1	ctg7180001895488_562_SCT	7135172	T	C	0.286316	0.57	0.00415423	0.0065196	1.02744	0.0270692	0.042482
1	ctg7180001760107_835_SAG	7139382	A	G	0.427727	0.13	-0.00554804	0.00581576	0.964309	-0.0363432	0.0380969
1	ctg7180001825071_6112_SAG	7143716	A	G	0.107962	0.38	0.00644582	0.00787995	1.04261	0.0417271	0.0510109
1	ctg7180001825071_2656_SAG	7147173	G	A	0.430011	0.18	-0.00534348	0.00583351	0.965606	-0.0349991	0.0382087
1	ctg7180001825071_2037_SCT	7147792	C	T	0.0848558	0.37	-0.00591105	0.00810136	0.961704	-0.039049	0.0535184
1	ctg7180001825071_1868_SAC	7147961	A	C	0.427458	0.14	-0.00544269	0.00581998	0.964976	-0.0356521	0.0381235
1	ctg7180001480154_1121_SAG	7153008	G	A	0.0729894	0.39	0.00732182	0.00812401	1.04842	0.0472855	0.0524661
1	ctg7180001849821_5782_SAC	7162097	C	A	0.371395	0.38	0.00504176	0.0059389	1.03343	0.0328852	0.0387369
1	ctg7180001849821_5812_SAG	7162127	G	A	0.372022	0.32	0.00557621	0.00594285	1.03703	0.0363623	0.0387532
1	ctg7180001863284_10376_SAG	7172416	A	G	0.207371	0.00069	0.0150797	0.00497508	1.1018	0.0969435	0.0319835
1	ctg7180001863284_8108_SAG	7174684	G	A	0.207953	0.00096	0.014891	0.00496889	1.10049	0.095753	0.0319513
1	ctg7180001354566_10746_SCT	7184864	C	T	0.0788555	0.048	0.0141264	0.00749732	1.09445	0.0902504	0.0478987
1	ctg7180001354566_10469_SAG	7185141	A	G	0.0783629	0.22	0.00957143	0.00751549	1.06353	0.0615965	0.0483656
1	ctg7180001354566_9555_SAC	7186055	A	C	0.0555705	0.89	0.000296982	0.00880034	1.00194	0.00194099	0.0575164
1	ctg7180001354566_4505_SCT	7191105	T	C	0.183727	0.7	-0.00100257	0.00519791	0.993457	-0.00656453	0.0340344
1	ctg7180001524558_2823_SGT	7218109	G	T	0.467446	0.1	-0.00436623	0.00404114	0.971834	-0.0285702	0.026443
1	ctg7180001910668_3563_SGT	7233166	T	G	0.0619291	0.0078	0.0213416	0.00839223	1.14412	0.134639	0.0529445
1	ctg7180001910668_3152_SGT	7233576	T	G	0.0621977	0.0005	0.0262949	0.00837836	1.17894	0.164614	0.0524511
1	ctg7180001910668_3021_SAG	7233707	A	G	0.0621977	0.011	0.0205095	0.00837836	1.13833	0.129563	0.052928
1	ctg7180001819760_3363_SAC	7252904	A	C	0.129008	0.0012	0.016478	0.00601543	1.11097	0.105231	0.0384155
1	ctg7180001819760_1516_SCT	7254751	T	C	0.402964	0.0016	-0.00993497	0.00410488	0.936837	-0.0652463	0.0269581
1	ctg7180001819760_889_SAG	7255378	G	A	0.0223446	0.00031	0.0392642	0.0136774	1.27083	0.239669	0.0834869
1	ctg7180001204225_220_SAG	7256458	A	G	0.0641232	0.0011	0.0245919	0.00826971	1.16694	0.154388	0.0519171
1	ctg7180001204225_860_SGT	7257098	T	G	0.0613469	0.026	0.018798	0.00844467	1.12645	0.119069	0.0534895
1	ctg7180001822632_8601_SAC	7266726	C	A	0.440534	0.012	-0.00769227	0.00411032	0.950843	-0.050406	0.0269342
1	ctg7180001822632_9177_SCT	7267302	C	T	0.386665	1	0.000496495	0.00585277	1.00325	0.00324595	0.0382638
1	ctg7180001325528_633_SGT	7273808	G	T	0.141546	0.0094	0.014112	0.00594304	1.0947	0.0904794	0.0381039
1	ctg7180001223513_204_SCT	7277798	C	T	0.0990059	0.025	-0.012409	0.00673974	0.920469	-0.0828719	0.0450105
1	ctg7180001223513_3424_SAC	7281018	C	A	0.129411	0.0017	0.0162755	0.00601281	1.10957	0.10397	0.0384104
1	ctg7180001552864_1034_SGT	7292654	T	G	0.043525	0.37	0.00558119	0.009862	1.03679	0.0361255	0.0638341
1	ctg7180001274815_322_SCT	7294431	T	C	0.428802	0.4	0.00174057	0.00407104	1.01144	0.0113763	0.0266083
1	ctg7180001274815_2891_SAG	7297000	A	G	0.129545	0.0035	0.0154653	0.00600954	1.10396	0.0989044	0.0384325
1	ctg7180001713001_3203_SAG	7301669	A	G	0.0617947	0.004	0.0221812	0.00840904	1.14998	0.139749	0.0529796
1	ctg7180001713001_3192_SCT	7301680	C	T	0.443176	0.0071	-0.00845067	0.0040523	0.946122	-0.0553833	0.0265576
1	ctg7180001284117_336_SCT	7309508	T	C	0.403233	0.0021	-0.00967572	0.00410329	0.938441	-0.0635353	0.0269441
1	ctg7180001824240_9690_SAG	7323332	G	A	0.143426	0.39	0.00515984	0.00576133	1.03406	0.0334934	0.0373977
1	ctg7180001824240_7747_SAG	7325275	G	A	0.170115	0.058	0.00969162	0.00537374	1.06458	0.062581	0.0346995
1	ctg7180001824240_6189_SCT	7326617	T	C	0.124754	0.054	0.011081	0.00613364	1.07389	0.0712839	0.0394576
1	ctg7180001824240_6111_SGT	7326695	T	G	0.230969	9.4e-05	0.0177769	0.00674302	1.12092	0.114149	0.0432981
1	ctg7180001824240_5939_SAG	7326867	A	G	0.070437	0.093	-0.0115409	0.00802025	0.925832	-0.0770626	0.053554
1	ctg7180001632327_1585_SAC	7333837	C	A	0.0703923	0.038	0.0154511	0.00790677	1.10347	0.0984566	0.0503831
1	ctg7180001632327_1702_SAG	7333954	A	G	0.0542271	0.56	-0.00298286	0.00888718	0.980579	-0.0196125	0.0584337
1	ctg7180001788655_4601_SAC	7342661	A	C	0.0215834	0.11	-0.02203	0.0138615	0.860012	-0.150809	0.0948903
1	ctg7180001788655_4183_SGT	7343079	G	T	0.0273598	0.27	-0.0122649	0.0124775	0.921097	-0.0821894	0.0836141
1	ctg7180001881730_7364_SCT	7347068	C	T	0.0977969	0.71	0.00250776	0.00678797	1.01647	0.016332	0.0442073
1	ctg7180001881730_5470_SAG	7348962	A	G	0.0273598	0.00013	0.0397875	0.0123715	1.27487	0.242847	0.0755108
1	ctg7180001881730_1961_SCT	7352471	T	C	0.0426742	0.42	0.00536142	0.00998554	1.03533	0.0347162	0.0646582
1	ctg7180001928198_1907_SGT	7356585	T	G	0.0224342	0.014	0.0273526	0.0136645	1.18558	0.170235	0.085044
1	ctg7180001928198_2214_SCT	7356892	T	C	0.0226581	0.0019	0.0353881	0.0136326	1.24279	0.217359	0.0837336
1	ctg7180001928198_4991_SCT	7359829	C	T	0.0227924	0.026	0.0251518	0.013558	1.17014	0.157126	0.0846985
1	ctg7180001865491_2500_SCT	7380805	T	C	0.0426742	0.092	0.0230585	0.0143056	1.15584	0.144825	0.08985
1	ctg7180001865491_2533_SAC	7380838	C	A	0.0426294	0.51	0.00407255	0.0101342	1.02678	0.0264322	0.0657744
1	ctg7180001809604_50_SCT	7395598	C	T	0.0980656	0.0064	0.0228438	0.00955094	1.15516	0.144243	0.0603076
1	ctg7180001809604_763_SAG	7396311	A	G	0.0977969	0.0098	0.0214918	0.00955974	1.14564	0.135967	0.0604792
1	ctg7180001826025_1747_SGT	7401678	T	G	0.0639889	0.89	0.00251704	0.00840137	1.01652	0.0163866	0.054695
1	ctg7180001280602_3641_SCT	7421734	C	T	0.06072	0.8	0.00249292	0.008459	1.01636	0.0162297	0.0550707
1	ctg7180001280602_1179_SGT	7424196	G	T	0.102946	0.94	0.000589242	0.0066368	1.00386	0.00384952	0.0433582
1	ctg7180001280602_412_SAG	7424963	A	G	0.0196579	0.098	-0.0236669	0.0146056	0.849899	-0.162638	0.100369
1	ctg7180001886210_5624_SGT	7433118	G	T	0.0184041	0.087	-0.0270665	0.0149988	0.829054	-0.187469	0.103885
1	ctg7180001886210_5377_SAG	7433365	A	G	0.0189414	0.64	-0.00140681	0.0148237	0.990817	-0.00922494	0.0972041
1	ctg7180001755248_3428_SGT	7444696	T	G	0.239746	0.52	0.00330706	0.00473771	1.02178	0.0215508	0.0308738
1	ctg7180001755248_3935_SCT	7445203	T	C	0.234686	0.21	0.00602315	0.00477272	1.03991	0.0391369	0.0310119
1	ctg7180001877197_562_SGT	7463193	T	G	0.265896	0.00045	0.0173234	0.00652603	1.11802	0.111555	0.0420249
1	ctg7180001672290_3769_SAG	7469689	G	A	0.316631	5.4e-05	0.020957	0.00626242	1.14469	0.135135	0.0403813
1	ctg7180001672290_4431_SAG	7470351	A	G	0.0860648	0.00071	0.0290665	0.0103963	1.19924	0.181687	0.0649846
1	ctg7180001798391_7770_SCT	7472284	C	T	0.242029	0.41	0.00402567	0.0047173	1.02656	0.0262153	0.0307192
1	ctg7180001798391_7733_SAG	7472321	A	G	0.240776	0.32	0.00471342	0.00472165	1.03115	0.0306718	0.0307253
1	ctg7180001798391_6860_SAC	7473491	A	C	0.241134	0.3	0.00480516	0.00471866	1.03176	0.0312661	0.0307032
1	ctg7180001798391_5613_SCT	7474738	T	C	0.24091	0.32	0.00498953	0.00472046	1.03299	0.0324595	0.0307091
1	ctg7180001798391_4484_SGT	7475867	G	T	0.206833	0.43	-0.00187775	0.00498398	0.987769	-0.0123068	0.032665
1	ctg7180001798391_4253_SCT	7476098	T	C	0.240552	0.22	0.00552895	0.00472345	1.0366	0.0359488	0.0307115
1	ctg7180001350119_211_SAC	7501024	A	C	0.264419	0.38	-0.00246037	0.00457655	0.984002	-0.0161273	0.0299986
1	ctg7180001917809_3277_SGT	7514591	T	G	0.296391	0.81	0.000218993	0.00625959	1.00143	0.00143178	0.0409254
1	ctg7180001917809_1512_SCT	7516747	T	C	0.245477	0.69	0.00344016	0.00523113	1.02267	0.0224169	0.0340873
1	ctg7180001917809_1080_SAC	7517179	C	A	0.30866	0.88	0.00230634	0.00623906	1.01517	0.0150549	0.0407261
1	ctg7180001629434_1821_SCT	7524506	T	C	0.0510478	0.52	-0.0043908	0.00927186	0.971468	-0.0289469	0.0611259
1	ctg7180001629434_1626_SAG	7524701	G	A	0.0496149	0.28	-0.00794537	0.00932422	0.948629	-0.0527375	0.0618897
1	ctg7180001629434_1430_SAG	7524897	G	A	0.0553018	0.86	-0.000620378	0.00887799	0.995947	-0.00406136	0.0581205
1	ctg7180001539005_652_SAC	7527508	A	C	0.049391	0.84	-0.00154644	0.00933772	0.98991	-0.0101414	0.0612358
1	ctg7180001539005_915_SCT	7527771	T	C	0.048988	0.33	-0.00677572	0.00938131	0.956118	-0.0448741	0.0621304
1	ctg7180001904319_5314_SAG	7558833	A	G	0.450564	0.083	0.00715775	0.0055999	1.04786	0.0467472	0.0365729
1	ctg7180001794659_1487_SCT	7565781	T	C	0.335662	0.61	-0.00144412	0.00440454	0.990592	-0.00945263	0.0288303
1	ctg7180001817021_5539_SCT	7602879	T	C	0.276867	0.64	0.00195578	0.00627875	1.01285	0.0127667	0.0409858
1	ctg7180001817021_3151_SCG	7605267	G	C	0.352857	0.99	-0.00204916	0.00425959	0.986673	-0.0134166	0.0278891
1	ctg7180001817021_2378_SAC	7606040	C	A	0.194653	0.048	-0.00769903	0.00511477	0.950427	-0.0508435	0.0337774
1	ctg7180001923311_13566_SCT	7616436	T	C	0.224431	0.64	0.00260544	0.00483548	1.01713	0.0169882	0.0315288
1	ctg7180001923311_12968	7617034	A	T	0.0179115	0.39	0.0212049	0.021433	1.14261	0.133315	0.134749
1	ctg7180001833002_3547_SCT	7632902	T	C	0.244358	0.92	0.00298153	0.00648804	1.01963	0.0194371	0.0422967
1	ctg7180001833002_3586_SAG	7632941	A	G	0.209789	0.97	0.000769618	0.00495177	1.00504	0.00502813	0.0323513
1	ctg7180001833002_3641_SCT	7632996	C	T	0.234462	0.89	0.00143094	0.00477342	1.00939	0.00934283	0.0311664
1	ctg7180001833002_3839_SAG	7633194	A	G	0.483029	0.43	-0.00362223	0.00403596	0.976585	-0.0236936	0.0263999
1	ctg7180001833002_3890_SAG	7633245	G	A	0.21861	0.73	0.00185898	0.00488396	1.0122	0.0121306	0.0318697
1	ctg7180001833002_4186_SCG	7633541	C	G	0.23585	0.68	0.00227817	0.0047579	1.01497	0.0148613	0.0310374
1	ctg7180001833002_4379_SAG	7633734	A	G	0.227566	0.46	0.00314513	0.00482777	1.02071	0.0204958	0.0314611
1	ctg7180001833002_5461_SCG	7634816	C	G	0.219595	0.65	0.00216872	0.00487923	1.01425	0.0141469	0.031828
1	ctg7180001833002_5783_SGT	7635138	G	T	0.262314	0.69	0.00473637	0.00632898	1.03131	0.0308332	0.0412008
1	ctg7180001402401_3087_SAG	7644450	A	G	0.207147	1	0.00383954	0.00703168	1.02531	0.0249944	0.0457743
1	ctg7180001402401_6790_SCT	7648153	C	T	0.219013	0.35	0.00391973	0.00487077	1.02585	0.0255188	0.0317104
1	ctg7180001402401_7201_SAC	7648564	A	C	0.218924	0.57	0.00257271	0.00487085	1.01692	0.0167745	0.0317587
1	ctg7180001402401_7913_SAT	7649276	T	A	0.220312	0.65	0.00243731	0.0048601	1.01602	0.0158943	0.0316939
1	ctg7180001402401_15868_SCT	7657231	C	T	0.0263299	0.29	-0.00826973	0.0126448	0.946515	-0.0549686	0.0840495
1	ctg7180001402401_16421_SAG	7657784	G	A	0.472506	0.27	-0.00263719	0.00403449	0.982897	-0.0172507	0.0263909
1	ctg7180001402401_16458_SAG	7657821	G	A	0.488805	0.21	-0.00294733	0.00402938	0.980908	-0.0192764	0.0263533
1	ctg7180001402401_16482_SAG	7657845	A	G	0.0172846	0.96	0.00236633	0.0154597	1.01552	0.0154026	0.100628
1	ctg7180001402401_17240_SAG	7658603	G	A	0.488358	0.12	-0.0037906	0.00402946	0.975512	-0.0247933	0.0263556
1	ctg7180001402401_18108_SAG	7659471	A	G	0.444833	0.39	-0.00303949	0.00572578	0.980306	-0.0198901	0.037469
1	ctg7180001402401_18331_SAT	7659694	T	A	0.487193	0.14	-0.00359083	0.0040315	0.976787	-0.0234867	0.026369
1	ctg7180001402401_19458_SAG	7660821	A	G	0.372067	0.58	0.000791472	0.00416797	1.00519	0.00517348	0.0272441
1	ctg7180001402401_20157_SCG	7661520	C	G	0.339871	0.16	-0.00334817	0.00425324	0.978296	-0.0219432	0.0278749
1	ctg7180001402401_20733_SAT	7662096	A	T	0.339916	0.15	-0.00341368	0.00425289	0.977875	-0.0223735	0.0278738
1	ctg7180001239497_1820_SAG	7670320	A	G	0.13362	0.48	0.00476139	0.00592662	1.0314	0.0309185	0.038485
1	ctg7180001239497_4536_SCT	7673036	T	C	0.190355	0.13	-0.00578735	0.00512594	0.96259	-0.0381277	0.0337703
1	ctg7180001239497_11518_SCT	7680018	T	C	0.212699	0.057	-0.00639485	0.00491917	0.958737	-0.042139	0.032415
1	ctg7180001370053_254_SCT	7683228	C	T	0.21261	0.05	-0.00662101	0.00491993	0.957297	-0.0436415	0.032429
1	ctg7180001594878_690_SAC	7685053	A	C	0.115753	0.38	0.0067255	0.00630679	1.04449	0.0435281	0.0408181
1	ctg7180001862689_92_SCT	7689190	C	T	0.132814	0.83	0.00272585	0.00594652	1.01791	0.017753	0.0387286
1	ctg7180001862689_189_SAC	7689287	A	C	0.115932	0.33	0.00744747	0.00630253	1.04933	0.0481488	0.0407467
1	ctg7180001862689_266_SAG	7689364	G	A	0.349498	0.2	-0.00261628	0.00423117	0.98301	-0.0171363	0.0277137
1	ctg7180001862689_315_SGT	7689413	T	G	0.0169712	0.074	-0.0248131	0.0156313	0.842817	-0.171005	0.107727
1	ctg7180001862689_4440_SAG	7693538	G	A	0.420965	0.22	-0.00744733	0.00588705	0.952346	-0.0488265	0.0385969
1	ctg7180001862689_4516_SAG	7693614	G	A	0.0182697	0.19	-0.017568	0.0153342	0.887697	-0.119125	0.103978
1	ctg7180001862689_4544_SCT	7693642	C	T	0.132232	0.94	0.00211622	0.00595825	1.01389	0.0137949	0.0388397
1	ctg7180001862689_4772_SGT	7693870	G	T	0.116022	0.31	0.00746625	0.00630456	1.04945	0.048269	0.0407587
1	ctg7180001862689_4862_SGT	7693960	G	T	0.0378829	0.16	-0.00971536	0.0106052	0.937314	-0.0647374	0.0706667
1	ctg7180001862689_5293_SAG	7694391	G	A	0.0177324	0.67	-0.0087466	0.0152466	0.943449	-0.0582127	0.101473
1	ctg7180001862689_5393_SAC	7694491	A	C	0.218028	0.15	-0.00453561	0.0048755	0.970623	-0.0298169	0.0320513
1	ctg7180001624818_1685_SAG	7710587	A	G	0.0215834	0.76	-0.00693323	0.0138468	0.955073	-0.0459672	0.091804
1	ctg7180001889742_21723_SAG	7717586	A	G	0.209565	0.76	0.00384162	0.00698693	1.02532	0.0250088	0.0454846
1	ctg7180001889742_16812_SCT	7722311	T	C	0.196713	0.22	-0.00453809	0.00507023	0.970596	-0.0298451	0.0333448
1	ctg7180001889742_16801_SCG	7722322	C	G	0.445012	0.2	-0.00328961	0.0040508	0.978702	-0.0215282	0.0265096
1	ctg7180001889742_12918_SGT	7726228	T	G	0.273554	0.16	0.00349647	0.00451513	1.02305	0.0227916	0.0294317
1	ctg7180001605186_2555_SAC	7742159	C	A	0.273195	0.18	0.00331509	0.00451698	1.02185	0.0216127	0.0294484
1	ctg7180001605186_3625_SAG	7743229	G	A	0.0472864	0.29	0.00651994	0.00949446	1.04304	0.0421348	0.0613575
1	ctg7180001605186_4616_SCG	7744220	C	G	0.0112395	0.6	-3.49644e-05	0.0191069	0.999771	-0.000228656	0.124953
1	ctg7180001605186_6852_SAC	7746456	C	A	0.331721	0.089	0.00451183	0.00427674	1.02985	0.029415	0.0278823
1	ctg7180001605186_7362_SAG	7746966	A	G	0.0471968	0.32	0.00598955	0.00950779	1.0395	0.0387437	0.0615016
1	ctg7180001605186_10080_SGT	7749684	T	G	0.331721	0.089	0.00451183	0.00427674	1.02985	0.029415	0.0278823
1	ctg7180001605186_10119_SCT	7749723	T	C	0.331229	0.094	0.00437359	0.00428073	1.02893	0.028516	0.0279106
1	ctg7180001605186_10986_SAG	7750590	A	G	0.30669	0.25	-0.00678307	0.00637631	0.956378	-0.0446016	0.041927
1	ctg7180001461490_597_SAC	7751401	A	C	0.0219416	0.36	0.0169765	0.0187118	1.11356	0.107563	0.118558
1	ctg7180001461490_570_SGT	7751428	T	G	0.0806018	0.25	0.0069959	0.00854307	1.04625	0.0452149	0.0552144
1	ctg7180001798953_967_SCT	7753097	T	C	0.30669	0.25	-0.00678307	0.00637631	0.956378	-0.0446016	0.041927
1	ctg7180001798953_1001_SGT	7753131	T	G	0.39974	0.75	0.000901779	0.00599484	1.00591	0.00589477	0.0391872
1	ctg7180001798953_1283_SAT	7753413	T	A	0.0593319	0.51	0.00508825	0.00854662	1.03352	0.0329749	0.0553872
1	ctg7180001798953_2639_SAT	7754769	T	A	0.273464	0.14	0.00376053	0.0045212	1.02481	0.0245071	0.0294643
1	ctg7180001798953_2676_SCT	7754806	T	C	0.0112395	0.6	-3.49644e-05	0.0191069	0.999771	-0.000228656	0.124953
1	ctg7180001798953_3366_SCG	7755496	G	C	0.0116873	0.41	0.0182048	0.0187408	1.12188	0.11501	0.118396
1	ctg7180001798953_3935_SGT	7756121	G	T	0.273912	0.07	0.00483662	0.00451838	1.03199	0.03149	0.029418
1	ctg7180001798953_4305_SAT	7756491	A	T	0.287256	0.98	0.000616897	0.00445312	1.00404	0.00403187	0.0291044
1	ctg7180001798953_7791_SCT	7759977	C	T	0.0476446	0.31	0.00626896	0.00944636	1.04136	0.0405313	0.0610745
1	ctg7180001798953_9361_SAG	7761547	G	A	0.275255	0.23	0.00268758	0.00455947	1.01769	0.017532	0.0297429
1	ctg7180001798953_10047_SAG	7762233	G	A	0.267553	0.78	-0.00349371	0.00656986	0.977338	-0.022923	0.0431063
1	ctg7180001798809_119_SCG	7762713	C	G	0.0115529	0.5	0.0157289	0.0188669	1.10497	0.0998152	0.119729
1	ctg7180001798809_3446_SAT	7766040	T	A	0.269389	0.071	0.00472189	0.00454132	1.03122	0.0307435	0.0295678
1	ctg7180001798809_4593_SCG	7767187	C	G	0.011329	0.59	-0.000359214	0.0190319	0.997652	-0.00235066	0.124543
1	ctg7180001798809_4642_SCG	7767236	C	G	0.272703	0.079	0.00461003	0.00451978	1.03048	0.0300201	0.0294324
1	ctg7180001798809_10229_SCT	7772823	T	C	0.284032	0.46	0.0032289	0.00446236	1.02128	0.0210554	0.0290987
1	ctg7180001851923_3746_SAG	7789304	A	G	0.444116	0.097	-0.0046337	0.00405124	0.97012	-0.0303351	0.026522
1	ctg7180001851923_3776_SAG	7789334	G	A	0.444027	0.089	-0.0047859	0.00405133	0.969153	-0.0313328	0.0265236
1	ctg7180001851923_5320_SAT	7790878	T	A	0.444116	0.097	-0.0046337	0.00405124	0.97012	-0.0303351	0.026522
1	ctg7180001910034_5492_SAG	7806434	A	G	0.439146	0.045	-0.00581629	0.0040562	0.962623	-0.0380935	0.0265659
1	ctg7180001831462_112_SGT	7811331	G	T	0.276599	0.091	0.00461594	0.00450418	1.03052	0.0300606	0.0293328
1	ctg7180001831462_261_SGT	7811480	T	G	0.276599	0.091	0.00461594	0.00450418	1.03052	0.0300606	0.0293328
1	ctg7180001831462_302_SCT	7811521	T	C	0.284077	0.8	-0.00190718	0.00644798	0.987585	-0.0124926	0.0422362
1	ctg7180001908020_497_SCT	7819528	C	T	0.375694	0.044	-0.00610635	0.00415524	0.960732	-0.04006	0.02726
1	ctg7180001878418_6424_SAG	7833509	A	G	0.398039	0.27	-0.00284343	0.00411097	0.981556	-0.0186163	0.0269151
1	ctg7180001928576_554_SCT	7845991	C	T	0.398039	0.29	-0.00267601	0.00411135	0.982634	-0.0175189	0.0269156
1	ctg7180001928576_2607_SAT	7848214	A	T	0.401979	0.26	-0.00273153	0.00410614	0.982277	-0.0178821	0.026881
1	ctg7180001928576_2651_SAT	7848258	T	A	0.402427	0.41	-0.00185531	0.00410539	0.987932	-0.0121414	0.0268662
1	ctg7180001928576_2858_SCG	7848465	C	G	0.402606	0.38	-0.00203097	0.00410471	0.986796	-0.0132919	0.0268636
1	ctg7180001928576_2989_SAT	7848596	T	A	0.402606	0.38	-0.00203097	0.00410471	0.986796	-0.0132919	0.0268636
1	ctg7180001928576_3068_SAC	7848675	A	C	0.32599	0.024	-0.00872053	0.00641126	0.94422	-0.057396	0.0421971
1	ctg7180001928576_3964_SCT	7849571	C	T	0.272748	0.078	0.00467137	0.00452389	1.03089	0.0304179	0.0294576
1	ctg7180001928576_4597_SGT	7850204	T	G	0.403636	0.31	-0.00236224	0.00412321	0.984657	-0.0154618	0.0269881
1	ctg7180001928576_4813_SCG	7850420	C	G	0.184981	0.45	-0.00272591	0.00518501	0.982271	-0.0178884	0.0340259
1	ctg7180001928576_5177_SAG	7850784	G	A	0.403636	0.31	-0.00236224	0.00412321	0.984657	-0.0154618	0.0269881
1	ctg7180001928576_5634_SGT	7851241	G	T	0.401308	0.26	-0.00278889	0.004119	0.981908	-0.0182581	0.026966
1	ctg7180001294983_1100_SAG	7854436	G	A	0.390605	0.0026	-0.0129555	0.00618819	0.918271	-0.0852625	0.0407256
1	ctg7180001706971_328_SCT	7855627	C	T	0.232536	0.033	0.00841965	0.0047809	1.05609	0.0545708	0.0309868
1	ctg7180001802888_1319_SAG	7880497	G	A	0.0229267	0.00017	0.0419812	0.0134442	1.2907	0.255186	0.0817217
1	ctg7180001802888_4192_SCT	7883370	T	C	0.189952	0.88	-8.47894e-05	0.0051372	0.999446	-0.000554516	0.0335969
1	ctg7180001588776_1144_SGT	7892072	G	T	0.189504	0.61	-0.00145788	0.00514186	0.990494	-0.00955108	0.0336861
1	ctg7180001588776_249_SAG	7892966	A	G	0.130888	0.2	0.00472056	0.00863772	1.03113	0.0306535	0.0560901
1	ctg7180001904534_9722_SCT	7949941	T	C	0.0175085	0.41	0.0121826	0.0153922	1.08095	0.0778404	0.0983481
1	ctg7180001519321_799_SCT	7957168	T	C	0.116335	0.0026	0.0158197	0.00627583	1.10632	0.101038	0.0400826
1	ctg7180001838884_1506_SAC	7995635	C	A	0.133396	0.0044	0.0141344	0.0059523	1.09481	0.0905785	0.0381446
1	ctg7180001796402_3706_SAG	8005015	A	G	0.155875	0.0031	0.0149252	0.00554774	1.1004	0.0956712	0.0355613
1	ctg7180001852340_5494_SGT	8011007	T	G	0.265896	0.19	0.0066606	0.00455602	1.04424	0.0432869	0.0296093
1	ctg7180001852340_4287_SCT	8012214	T	C	0.21149	0.35	0.00440888	0.00492977	1.0291	0.0286839	0.0320728
1	ctg7180001852340_1813_SGT	8014688	G	T	0.206654	0.17	-0.00681606	0.00727641	0.95605	-0.0449454	0.047981
1	ctg7180001269441_587_SAG	8018235	A	G	0.112126	0.014	0.0135383	0.00637738	1.0906	0.0867296	0.040855
1	ctg7180001829473_4588_SGT	8028570	G	T	0.116156	0.0098	0.0136649	0.00628003	1.09149	0.0875437	0.0402328
1	ctg7180001927994_5062_SCT	8036097	T	C	0.0218073	0.53	0.0138244	0.0138573	1.09208	0.0880863	0.088296
1	ctg7180001873841_4556_SAG	8036262	A	G	0.0218073	0.53	0.0138244	0.0138573	1.09208	0.0880863	0.088296
1	ctg7180001818349_714_SAC	8054244	A	C	0.282241	0.22	0.00297947	0.00447091	1.01962	0.0194326	0.0291601
1	ctg7180001818349_1563_SAC	8055093	A	C	0.189773	0.54	-0.00186075	0.00513158	0.987877	-0.0121967	0.0336361
1	ctg7180001818349_3090_SAG	8056620	G	A	0.378784	0.055	-0.00588888	0.00415032	0.962111	-0.0386258	0.0272224
1	ctg7180001818349_3829_SAG	8057359	A	G	0.0999463	0.062	-0.0104175	0.00670893	0.933022	-0.0693269	0.0446469
1	ctg7180001818349_6353_SGT	8060413	G	T	0.0314347	0.26	-0.00999162	0.0115746	0.935539	-0.0666327	0.0771894
1	ctg7180001705107_2385_SCT	8090302	T	C	0.110738	0.12	-0.00737916	0.00641878	0.952338	-0.0488351	0.0424793
1	ctg7180001705107_4113_SAG	8092032	G	A	0.11029	0.042	-0.00955258	0.0064302	0.938521	-0.0634499	0.0427105
1	ctg7180001705107_4197_SGT	8092116	G	T	0.393382	0.034	0.00782636	0.00411933	1.05234	0.0510159	0.0268517
1	ctg7180001705107_4217_SAG	8092136	A	G	0.108454	0.13	-0.00767636	0.00648158	0.95044	-0.0508307	0.0429192
1	ctg7180001705107_5254_SCT	8093173	T	C	0.393382	0.034	0.00782636	0.00411933	1.05234	0.0510159	0.0268517
1	ctg7180001705107_5355_SAG	8093274	G	A	0.497582	0.37	-0.00401628	0.00402625	0.974076	-0.0262659	0.0263311
1	ctg7180001705107_5497_SGT	8093416	G	T	0.497582	0.37	-0.00401628	0.00402625	0.974076	-0.0262659	0.0263311
1	ctg7180001557173_4152_SGT	8099184	T	G	0.113559	0.091	-0.00719065	0.0063492	0.953545	-0.0475687	0.0420022
1	ctg7180001557173_5346_SAC	8100378	A	C	0.28242	0.26	0.00260455	0.00447104	1.01714	0.0169929	0.0291704
1	ctg7180001803128_5911_SCT	8115967	C	T	0.118261	0.007	-0.0123669	0.00624004	0.920809	-0.0825028	0.0416289
1	ctg7180001803128_5443_SCT	8116435	T	C	0.393561	0.034	0.00780925	0.004119	1.05222	0.050905	0.0268499
1	ctg7180001803128_5371_SGT	8116507	T	G	0.112798	0.081	-0.00764089	0.0063729	0.950672	-0.0505859	0.0421913
1	ctg7180001541705_965	8138285	T	A	0.100215	0.062	-0.0103983	0.00670093	0.933144	-0.069196	0.0445917
1	ctg7180001541705_354_SAG	8138896	G	A	0.100215	0.062	-0.0103983	0.00670093	0.933144	-0.069196	0.0445917
1	ctg7180001541705_181_SAG	8139069	A	G	0.100663	0.16	-0.00803472	0.00668768	0.948144	-0.0532494	0.044322
1	ctg7180001808824_1612_SAG	8141207	A	G	0.100215	0.062	-0.0103983	0.00670093	0.933144	-0.069196	0.0445917
1	ctg7180001808824_2144_SCG	8141739	G	C	0.100663	0.16	-0.00803472	0.00668768	0.948144	-0.0532494	0.044322
1	ctg7180001808824_3182_SAT	8142777	A	T	0.100215	0.062	-0.0103983	0.00670093	0.933144	-0.069196	0.0445917
1	ctg7180001808824_3251_SCG	8142846	G	C	0.100663	0.16	-0.00803472	0.00668768	0.948144	-0.0532494	0.044322
1	ctg7180001808824_4532_SGT	8144128	G	T	0.100215	0.062	-0.0103983	0.00670093	0.933144	-0.069196	0.0445917
1	ctg7180001808824_5637_SGT	8145233	G	T	0.100663	0.16	-0.00803472	0.00668768	0.948144	-0.0532494	0.044322
1	ctg7180001808824_12030_SAC	8151626	A	C	0.10026	0.069	-0.0101525	0.00670044	0.934698	-0.0675314	0.0445693
1	ctg7180001808824_12439_SAC	8152035	A	C	0.100931	0.13	-0.00874854	0.00667977	0.943602	-0.0580505	0.0443233
1	ctg7180001818329_198_SAG	8157044	G	A	0.100215	0.062	-0.0103983	0.00670093	0.933144	-0.069196	0.0445917
1	ctg7180001807996_273_SAC	8160750	C	A	0.187041	0.044	-0.00808729	0.00516517	0.947955	-0.0534484	0.0341363
1	ctg7180001807996_729_SGT	8161206	T	G	0.404532	0.048	0.00798675	0.00410211	1.05346	0.0520771	0.0267475
1	ctg7180001807996_7416_SAC	8167893	C	A	0.144501	0.51	-0.00165345	0.00572977	0.98922	-0.0108383	0.0375585
1	ctg7180001807996_12607_SGT	8173084	G	T	0.0214938	0.32	-0.0155506	0.0139046	0.900356	-0.104965	0.0938544
1	ctg7180001807996_17624_SCT	8178101	T	C	0.318332	0.053	0.00787043	0.00432206	1.05251	0.0511795	0.0281053
1	ctg7180001907621_2505_SCT	8193876	T	C	0.328049	0.34	-0.00266517	0.00428973	0.98269	-0.0174612	0.0281047
1	ctg7180001907621_1067_SAT	8195314	T	A	0.0241358	0.072	-0.0216213	0.013257	0.862567	-0.147842	0.0906487
1	ctg7180001907621_484_SAC	8195897	C	A	0.186728	0.89	0.000279748	0.00742903	1.00183	0.00182868	0.0485627
1	ctg7180001796581_7793_SGT	8198138	T	G	0.0745119	0.55	-0.00242335	0.00768252	0.984212	-0.015914	0.0504507
1	ctg7180001796581_7457_SCT	8198474	T	C	0.0210013	0.026	-0.0296217	0.0140716	0.813574	-0.206318	0.0980101
1	ctg7180001796581_7235_SAC	8198696	C	A	0.303958	0.79	-0.000823306	0.004377	0.994627	-0.00538733	0.0286411
1	ctg7180001796581_6777_SCT	8199154	T	C	0.0210013	0.026	-0.0296217	0.0140716	0.813574	-0.206318	0.0980101
1	ctg7180001796581_2117_SCT	8203814	T	C	0.0210013	0.026	-0.0296217	0.0140716	0.813574	-0.206318	0.0980101
1	ctg7180001796581_1817_SAG	8204114	A	G	0.282957	0.33	0.00213084	0.00447044	1.01401	0.013908	0.0291787
1	ctg7180001796581_1769_SGT	8204162	G	T	0.303958	0.79	-0.000823306	0.004377	0.994627	-0.00538733	0.0286411
1	ctg7180001796581_1305_SCT	8204624	C	T	0.283405	0.2	0.0031656	0.00446829	1.02086	0.0206436	0.0291387
1	ctg7180001802124_100_SCT	8205962	T	C	0.304093	0.55	0.000230699	0.00437715	1.00151	0.00150831	0.0286179
1	ctg7180001802124_406_SCG	8206268	G	C	0.283405	0.2	0.0031656	0.00446829	1.02086	0.0206436	0.0291387
1	ctg7180001802124_4834_SGT	8210696	G	T	0.303958	0.79	-0.000823306	0.004377	0.994627	-0.00538733	0.0286411
1	ctg7180001299408_3042_SCT	8215614	T	C	0.282957	0.33	0.00213084	0.00447044	1.01401	0.013908	0.0291787
1	ctg7180001440761_5512_SAG	8222491	A	G	0.021046	0.023	-0.0298061	0.0140645	0.812459	-0.20769	0.0980021
1	ctg7180001440761_710_SAC	8226761	A	C	0.300018	0.22	0.00545753	0.00439653	1.03617	0.0355337	0.0286256
1	ctg7180001252861_1828_SCT	8229689	C	T	0.395979	0.16	-0.00404024	0.0041177	0.97388	-0.0264669	0.0269743
1	ctg7180001252861_2451_SCT	8230312	C	T	0.396427	0.27	-0.00315853	0.0041169	0.97953	-0.0206826	0.0269582
1	ctg7180001252861_2716_SCG	8230577	C	G	0.396427	0.27	-0.00315853	0.0041169	0.97953	-0.0206826	0.0269582
1	ctg7180001470910_3616_SCT	8238671	T	C	0.361723	0.035	0.0119172	0.00595127	1.08053	0.0774481	0.0386764
1	ctg7180001796770_6829_SAG	8261774	A	G	0.431936	0.33	-0.00170634	0.00408388	0.988899	-0.0111635	0.0267183
1	ctg7180001509076_1371_SAT	8275660	T	A	0.0412413	0.051	0.0179878	0.0101222	1.12067	0.113923	0.0641072
1	ctg7180001509076_758_SAT	8276273	T	A	0.457415	0.18	0.00624139	0.00405465	1.04162	0.0407753	0.0264892
1	ctg7180001509076_730_SGT	8276301	T	G	0.0442862	0.03	0.0195851	0.00980934	1.13172	0.123734	0.0619733
1	ctg7180001509076_593_SAC	8276438	A	C	0.0946176	0.072	-0.00996023	0.00689933	0.935901	-0.0662459	0.0458877
1	ctg7180001806163_3737_SAT	8281460	A	T	0.327781	0.15	-0.00340193	0.00430071	0.977947	-0.0223001	0.0281917
1	ctg7180001806163_3803_SCT	8281526	C	T	0.208177	0.61	-0.000632886	0.00497677	0.995867	-0.0041417	0.0325687
1	ctg7180001194725_2812_SAG	8289621	G	A	0.10738	0.35	0.00771178	0.00654548	1.05109	0.0498247	0.0422894
1	ctg7180001866764_3953_SAG	8296365	A	G	0.348334	0.62	-0.00358994	0.00424669	0.976746	-0.0235287	0.0278331
1	ctg7180001866764_4194_SAG	8296606	G	A	0.308839	0.55	-0.00252728	0.00646641	0.983577	-0.0165594	0.0423696
1	ctg7180001866764_4866_SAG	8297278	A	G	0.231282	0.49	0.00474085	0.00486464	1.03132	0.0308438	0.0316492
1	ctg7180001866764_4965_SGT	8297377	G	T	0.127351	0.00058	0.0175311	0.00610403	1.11827	0.111783	0.038921
1	ctg7180001866764_5645_SAG	8298057	G	A	0.4464	0.49	-0.00571952	0.00590139	0.96324	-0.0374523	0.0386433
1	ctg7180001866764_6600_SAG	8299012	A	G	0.235089	0.09	0.00653376	0.00476956	1.04335	0.0424328	0.0309754
1	ctg7180001866764_7020_SAG	8299432	A	G	0.187623	0.31	-0.00377842	0.00515557	0.975477	-0.0248286	0.0338781
1	ctg7180001866764_9672_SGT	8302084	T	G	0.454012	0.11	0.00665122	0.0040461	1.0444	0.0434465	0.0264295
1	ctg7180001857276_5801_SCG	8317025	G	C	0.234014	0.076	0.00686348	0.00477601	1.04557	0.0445577	0.0310059
1	ctg7180001857276_5508_SAG	8317318	G	A	0.108051	0.14	-0.00824006	0.0065327	0.946849	-0.0546157	0.0432992
1	ctg7180001857276_5075_SAC	8317751	A	C	0.251522	0.89	0.00158812	0.00674805	1.01042	0.0103685	0.0440565
1	ctg7180001857276_2621_SAG	8320205	A	G	0.139575	0.15	0.009765	0.00589446	1.065	0.0629734	0.0380127
1	ctg7180001857276_419_SAT	8322407	A	T	0.138143	0.18	0.0093858	0.00593117	1.06243	0.0605565	0.0382675
1	ctg7180001395826_810_SGT	8326745	T	G	0.116783	0.037	-0.010806	0.00631771	0.930618	-0.0719066	0.0420401
1	ctg7180001932110_6119_SCT	8343409	T	C	0.157442	5.9e-07	0.028485	0.00782049	1.19677	0.179628	0.0493164
1	ctg7180001932110_2258_SAG	8347270	A	G	0.122963	0.0009	0.0167135	0.00613504	1.11255	0.106658	0.0391511
1	ctg7180001932110_1752_SCG	8347774	G	C	0.122963	0.0009	0.0167135	0.00613504	1.11255	0.106658	0.0391511
1	ctg7180001932110_1743_SAG	8347783	G	A	0.187623	0.31	-0.00377842	0.00515557	0.975477	-0.0248286	0.0338781
1	ctg7180001453024_2358_SAG	8353155	A	G	0.103887	0.98	0.00191143	0.00662687	1.01254	0.012461	0.0432018
1	ctg7180001851229_185_SAG	8353527	G	A	0.103887	0.98	0.00191143	0.00662687	1.01254	0.012461	0.0432018
1	ctg7180001851229_615_SGT	8353957	T	G	0.11038	0.22	-0.00669583	0.00646495	0.956702	-0.0442632	0.0427369
1	ctg7180001851229_2311_SAT	8355653	A	T	0.187623	0.31	-0.00377842	0.00515557	0.975477	-0.0248286	0.0338781
1	ctg7180001851230_1729_SAG	8371188	A	G	0.122963	0.00056	0.0172895	0.00613504	1.11655	0.110246	0.0391198
1	ctg7180001308262_1697_SAG	8376599	A	G	0.110245	0.22	-0.00665052	0.00647069	0.956992	-0.0439605	0.0427718
1	ctg7180001308262_1577_SAG	8376719	G	A	0.110693	0.44	-0.00446018	0.00645905	0.971051	-0.029376	0.0425412
1	ctg7180001308262_1057_SCT	8377239	T	C	0.110738	0.45	-0.00445128	0.00645863	0.971109	-0.029317	0.0425377
1	GCR_cBin42013_Ctg1_64	8380124	G	A	0.138859	0.74	0.00139894	0.00858131	1.00917	0.00912924	0.0560001
1	ctg7180001811916_1381_SCT	8380195	T	C	0.188698	0.49	-0.00256923	0.00514954	0.983285	-0.0168561	0.0337849
1	ctg7180001811916_2914_SAT	8381728	A	T	0.188698	0.49	-0.00256923	0.00514954	0.983285	-0.0168561	0.0337849
1	ctg7180001811916_2998_SCT	8381812	T	C	0.298272	0.13	-0.00529046	0.00441648	0.965847	-0.0347501	0.0290094
1	ctg7180001857314_741_SCT	8385322	C	T	0.114231	0.39	-0.00476926	0.00643574	0.969063	-0.0314254	0.0424061
1	ctg7180001857314_819_SGT	8385400	T	G	0.449579	0.0057	0.0141012	0.00577181	1.09637	0.0920093	0.0376606
1	ctg7180001857314_2459_SCT	8387040	C	T	0.449713	0.0062	0.0139022	0.00577095	1.09496	0.0907134	0.0376561
1	ctg7180001857314_2906_SCG	8387487	G	C	0.406278	0.069	-0.00529535	0.00410982	0.965894	-0.0347011	0.0269322
1	ctg7180001857314_7511_SCT	8392092	T	C	0.119246	0.84	0.000836481	0.00623364	1.00548	0.00546285	0.0407104
1	ctg7180001826199_1501_SAG	8410328	A	G	0.192504	0.15	-0.00578031	0.00510917	0.962637	-0.0380791	0.0336578
1	ctg7180001826199_1618_SAC	8410445	A	C	0.103529	0.89	0.0013353	0.00662903	1.00875	0.00871308	0.0432556
1	ctg7180001826199_2014_SAG	8410841	A	G	0.296033	0.19	-0.00372834	0.00441757	0.975839	-0.0244574	0.0289787
1	ctg7180001826199_2961_SGT	8411788	G	T	0.479626	0.0073	-0.00762635	0.00403372	0.951313	-0.0499123	0.0263996
1	ctg7180001886296_741_SCT	8413857	T	C	0.433727	0.13	0.00344886	0.00406207	1.02279	0.0225328	0.0265392
1	ctg7180001886296_3057_SCT	8416212	T	C	0.433727	0.13	0.00344886	0.00406207	1.02279	0.0225328	0.0265392
1	ctg7180001886296_3518_SAG	8416673	A	G	0.400681	0.042	0.00794274	0.00595394	1.05315	0.0517844	0.038818
1	ctg7180001886296_3589_SCG	8416744	G	C	0.433772	0.11	0.00372404	0.00406184	1.02463	0.0243291	0.0265359
1	ctg7180001886296_3912_SAG	8417067	A	G	0.433772	0.11	0.00372404	0.00406184	1.02463	0.0243291	0.0265359
1	ctg7180001886296_3916_SAG	8417071	A	G	0.0720491	0.24	-0.00409615	0.00787896	0.973381	-0.02698	0.051896
1	ctg7180001886296_4002_SCT	8417157	C	T	0.433772	0.11	0.00372404	0.00406184	1.02463	0.0243291	0.0265359
1	ctg7180001886296_4290_SAG	8417445	A	G	0.104066	0.17	-0.00687903	0.0066266	0.955523	-0.0454962	0.0438267
1	ctg7180001886296_8917_SAC	8422072	C	A	0.433772	0.11	0.00372404	0.00406184	1.02463	0.0243291	0.0265359
1	ctg7180001830481_1869_SCT	8429404	C	T	0.313675	0.0047	0.00793768	0.00434877	1.05296	0.0516067	0.0282735
1	ctg7180001905486_9729_SAG	8434763	A	G	0.160308	0.33	-0.00442133	0.00548537	0.971327	-0.0290921	0.0360934
1	ctg7180001905486_7044_SCT	8437448	T	C	0.0159413	0.63	-0.00612427	0.0160887	0.960268	-0.0405432	0.106509
1	ctg7180001905486_4222_SAG	8440270	G	A	0.373366	0.8	-0.000866065	0.00416322	0.99435	-0.00566593	0.0272364
1	ctg7180001905486_3935_SCT	8440557	C	T	0.0757209	0.27	0.00859073	0.00760731	1.05693	0.0553686	0.0490303
1	ctg7180001905486_3469_SCT	8441023	T	C	0.361634	0.86	-0.00109256	0.00419243	0.992877	-0.00714892	0.0274322
1	ctg7180001905486_1990_SCT	8442502	T	C	0.37341	0.76	-0.000730271	0.00416292	0.995234	-0.00477721	0.0272325
1	ctg7180001905486_523_SAG	8443969	A	G	0.174861	0.15	-0.00621173	0.00529779	0.959865	-0.0409626	0.0349358
1	ctg7180001905486_437_SAG	8444055	G	A	0.174816	0.13	-0.00643175	0.00529791	0.958461	-0.0424265	0.0349472
1	ctg7180001695121_7405_SCT	8448333	T	C	0.174816	0.13	-0.00643175	0.00529791	0.958461	-0.0424265	0.0349472
1	ctg7180001695121_6394_SCT	8449344	C	T	0.174816	0.13	-0.00643175	0.00529791	0.958461	-0.0424265	0.0349472
1	ctg7180001695121_6175_SAG	8449563	G	A	0.174816	0.13	-0.00643175	0.00529791	0.958461	-0.0424265	0.0349472
1	ctg7180001695121_5669_SAG	8450069	A	G	0.174816	0.13	-0.00643175	0.00529791	0.958461	-0.0424265	0.0349472
1	ctg7180001695121_4959_SAG	8450779	A	G	0.174816	0.13	-0.00643175	0.00529791	0.958461	-0.0424265	0.0349472
1	ctg7180001695121_4517_SGT	8451221	T	G	0.478372	0.95	-0.00125129	0.00402871	0.99185	-0.0081834	0.0263477
1	ctg7180001664629_4189_SAG	8459334	A	G	0.174816	0.13	-0.00643175	0.00529791	0.958461	-0.0424265	0.0349472
1	ctg7180001664629_3528_SCT	8459995	T	C	0.164876	0.0047	-0.0181819	0.00790244	0.885083	-0.122074	0.0530573
1	ctg7180001664629_1463_SAG	8462060	G	A	0.21355	0.47	-0.00223848	0.00491037	0.985431	-0.0146765	0.0321947
1	ctg7180001664629_517_SAG	8463006	G	A	0.21355	0.47	-0.00223848	0.00491037	0.985431	-0.0146765	0.0321947
1	ctg7180001664629_234_SAG	8463289	G	A	0.21355	0.47	-0.00223848	0.00491037	0.985431	-0.0146765	0.0321947
1	ctg7180001664629_145_SCG	8463378	G	C	0.21355	0.47	-0.00223848	0.00491037	0.985431	-0.0146765	0.0321947
1	ctg7180001664629_113_SCT	8463410	T	C	0.21355	0.47	-0.00223848	0.00491037	0.985431	-0.0146765	0.0321947
1	ctg7180001802179_15186_SAG	8464541	G	A	0.175443	0.24	-0.00512851	0.00529045	0.966795	-0.0337687	0.034835
1	ctg7180001802179_13407_SAC	8466320	C	A	0.214043	0.58	-0.00174071	0.00490593	0.988659	-0.0114061	0.0321465
1	ctg7180001802179_13150_SCT	8466577	C	T	0.201505	0.51	-0.00200364	0.0050178	0.986951	-0.0131344	0.0328931
1	ctg7180001802179_12467_SCG	8467260	C	G	0.214043	0.58	-0.00174071	0.00490593	0.988659	-0.0114061	0.0321465
1	ctg7180001802179_12418_SAG	8467309	G	A	0.213505	0.47	-0.00233538	0.00491042	0.984803	-0.0153136	0.0321987
1	ctg7180001802179_11828_SAC	8467899	C	A	0.213595	0.49	-0.00224787	0.00491033	0.98537	-0.0147382	0.0321948
1	ctg7180001802179_5557_SAC	8474170	A	C	0.219461	0.071	0.00665352	0.00707204	1.04413	0.0431871	0.0459036
1	ctg7180001802179_5312_SAC	8474415	A	C	0.416891	0.19	0.0029817	0.00409934	1.01967	0.0194789	0.0267803
1	ctg7180001802179_4768_SCG	8474959	G	C	0.2024	0.012	-0.0101024	0.00500949	0.935283	-0.0669061	0.0331768
1	ctg7180001802179_4050_SGT	8475677	T	G	0.174906	0.17	-0.00582914	0.00529684	0.962309	-0.0384194	0.034911
1	ctg7180001802179_3826_SAT	8475901	A	T	0.2024	0.012	-0.0101024	0.00500949	0.935283	-0.0669061	0.0331768
1	ctg7180001802179_3780_SCT	8475947	T	C	0.174906	0.17	-0.00582914	0.00529684	0.962309	-0.0384194	0.034911
1	ctg7180001802179_3468_SCT	8476259	T	C	0.2024	0.012	-0.0101024	0.00500949	0.935283	-0.0669061	0.0331768
1	ctg7180001375647_1008_SAC	8480047	A	C	0.213147	0.46	-0.00232527	0.00491408	0.984868	-0.0152472	0.0322224
1	ctg7180001375647_509_SGT	8480546	G	T	0.0275837	0.0032	-0.0287739	0.0123171	0.81885	-0.199855	0.0855508
1	ctg7180001853013_945_SAC	8486028	A	C	0.173697	0.15	-0.00595764	0.0053126	0.961487	-0.0392744	0.0350221
1	ctg7180001853013_3514_SAT	8488597	T	A	0.200743	0.4	-0.00254481	0.00502597	0.983445	-0.0166933	0.032969
1	ctg7180001797810_1193_SAG	8491329	A	G	0.205087	0.011	0.00752871	0.00498907	1.05001	0.0488001	0.0323385
1	ctg7180001553056_4565_SAC	8495432	A	C	0.213013	0.46	-0.00224892	0.00491554	0.985363	-0.0147452	0.0322291
1	ctg7180001553056_4209_SAG	8495788	A	G	0.0428533	0.0014	0.0294279	0.00995999	1.20075	0.182943	0.0619178
1	ctg7180001553056_3509_SAG	8496488	G	A	0.080154	0.05	-0.0106342	0.00741281	0.931595	-0.0708576	0.0493929
1	ctg7180001553056_2495_SAG	8497502	G	A	0.0806914	0.092	-0.00922977	0.00739023	0.940502	-0.0613418	0.049116
1	ctg7180001553056_2258_SGT	8497739	G	T	0.080154	0.05	-0.0106342	0.00741281	0.931595	-0.0708576	0.0493929
1	ctg7180001553056_1977_SAC	8498020	C	A	0.177861	0.1	-0.00677227	0.00526208	0.956294	-0.04469	0.0347243
1	ctg7180001480651_19500_SGT	8500905	G	T	0.0803779	0.043	-0.0110245	0.00740449	0.929127	-0.0735098	0.0493721
1	ctg7180001480651_19420_SCT	8500985	C	T	0.080154	0.05	-0.0106342	0.00741281	0.931595	-0.0708576	0.0493929
1	ctg7180001480651_19104_SCT	8501301	C	T	0.371037	0.25	0.00225303	0.00417054	1.01482	0.0147159	0.0272403
1	ctg7180001480651_18677_SAT	8501728	A	T	0.0806914	0.092	-0.00922977	0.00739023	0.940502	-0.0613418	0.049116
1	ctg7180001480651_18630_SAG	8501775	A	G	0.0806914	0.092	-0.00922977	0.00739023	0.940502	-0.0613418	0.049116
1	ctg7180001480651_18610_SCT	8501795	C	T	0.0806914	0.092	-0.00922977	0.00739023	0.940502	-0.0613418	0.049116
1	ctg7180001480651_18006_SAG	8502399	G	A	0.209162	0.00027	0.0203747	0.00698266	1.13914	0.130277	0.0446476
1	ctg7180001480651_17723_SCT	8502682	C	T	0.119067	0.38	-0.00281643	0.00621503	0.981671	-0.0184986	0.040821
1	ctg7180001480651_17326_SCG	8503079	C	G	0.119425	0.4	-0.00269609	0.00620696	0.982451	-0.0177048	0.0407601
1	ctg7180001480651_17113_SCG	8503292	C	G	0.119425	0.4	-0.00269609	0.00620696	0.982451	-0.0177048	0.0407601
1	ctg7180001480651_15912_SCT	8504493	T	C	0.442952	0.59	0.000160485	0.00405527	1.00105	0.00104941	0.0265173
1	ctg7180001480651_12688_SAC	8507717	A	C	0.39768	0.71	-0.000814994	0.00411468	0.994683	-0.00533125	0.026916
1	ctg7180001480651_6016_SAG	8513963	A	G	0.0953788	0.024	-0.01115	0.00685033	0.928382	-0.074312	0.0456557
1	ctg7180001480651_5329_SAT	8514650	T	A	0.0393158	0.27	0.0107544	0.0103537	1.07139	0.068961	0.0663916
1	ctg7180001480651_4414_SGT	8515565	T	G	0.0953788	0.024	-0.01115	0.00685033	0.928382	-0.074312	0.0456557
1	ctg7180001480651_4199_SAG	8515780	A	G	0.0953788	0.024	-0.01115	0.00685033	0.928382	-0.074312	0.0456557
1	ctg7180001480651_1175_SCT	8518936	T	C	0.0957371	0.053	-0.00956203	0.00683886	0.938427	-0.0635503	0.0454518
1	ctg7180001264460_14614_SCT	8520375	T	C	0.421861	0.55	0.00263363	0.00407764	1.01736	0.0172079	0.0266429
1	ctg7180001264460_13819_SCT	8521170	T	C	0.421503	0.68	0.00208285	0.00407811	1.0137	0.0136113	0.0266503
1	ctg7180001264460_12169_SGT	8522820	G	T	0.0889755	0.059	-0.00933098	0.00707834	0.939877	-0.0620059	0.0470367
1	ctg7180001264460_10676_SAC	8524313	C	A	0.0956475	0.025	-0.0113804	0.00684172	0.92693	-0.0758774	0.0456163
1	ctg7180001264460_10412_SCT	8524577	C	T	0.421503	0.68	0.00208285	0.00407811	1.0137	0.0136113	0.0266503
1	ctg7180001264460_6404_SCG	8528585	G	C	0.0234641	0.04	0.0252337	0.0132931	1.17073	0.157627	0.0830376
1	ctg7180001264460_6122_SGT	8528867	G	T	0.398039	0.82	-0.000297246	0.00411405	0.998058	-0.001944	0.026906
1	ctg7180001264460_4423_SCT	8530566	T	C	0.443176	0.62	0.000151443	0.00405414	1.00099	0.000990284	0.02651
1	ctg7180001264460_4186_SAG	8530803	A	G	0.135322	0.19	-0.00465433	0.0058836	0.969815	-0.03065	0.0387451
1	ctg7180001264460_3706_SGT	8531283	G	T	0.135322	0.19	-0.00465433	0.0058836	0.969815	-0.03065	0.0387451
1	ctg7180001264460_1115_SAC	8533874	A	C	0.467759	0.27	0.00252601	0.00404262	1.01665	0.016513	0.0264274
1	ctg7180001264460_835_SCT	8534154	T	C	0.441385	0.0053	-0.0157227	0.00588505	0.901862	-0.103293	0.038663
1	ctg7180001851682_1434_SCT	8541853	C	T	0.311078	0.033	0.00599833	0.0043555	1.03982	0.039049	0.0283542
1	ctg7180001851682_1995_SGT	8542414	T	G	0.023285	0.11	0.0207607	0.0133429	1.1396	0.130682	0.0839891
1	ctg7180001851682_2178_SAG	8542597	G	A	0.0317034	0.31	0.0139734	0.0115267	1.09315	0.0890607	0.0734664
1	ctg7180001851682_3631_SAC	8544050	A	C	0.196713	0.057	0.00470723	0.00506376	1.03108	0.030606	0.0329241
1	ctg7180001851682_6194_SAC	8546613	C	A	0.023285	0.11	0.0207607	0.0133429	1.1396	0.130682	0.0839891
1	ctg7180001851682_6929_SAG	8547348	G	A	0.023285	0.11	0.0207607	0.0133429	1.1396	0.130682	0.0839891
1	ctg7180001851682_6944_SGT	8547363	T	G	0.023285	0.11	0.0207607	0.0133429	1.1396	0.130682	0.0839891
1	ctg7180001851682_7377_SAT	8547796	A	T	0.0283898	0.98	0.00135684	0.012175	1.00889	0.00884965	0.0794084
1	ctg7180001851682_14099_SCG	8554518	G	C	0.023285	0.11	0.0207607	0.0133429	1.1396	0.130682	0.0839891
1	ctg7180001851682_14654_SAG	8555073	A	G	0.023285	0.11	0.0207607	0.0133429	1.1396	0.130682	0.0839891
1	ctg7180001851682_15019_SAC	8555438	C	A	0.023285	0.11	0.0207607	0.0133429	1.1396	0.130682	0.0839891
1	ctg7180001851682_16530_SCT	8556949	C	T	0.0279867	0.014	0.0266745	0.012205	1.18093	0.1663	0.0760911
1	ctg7180001851682_16543_SAG	8556962	A	G	0.0279867	0.014	0.0266745	0.012205	1.18093	0.1663	0.0760911
1	ctg7180001794095_11160_SCT	8561642	C	T	0.023285	0.11	0.0207607	0.0133429	1.1396	0.130682	0.0839891
1	ctg7180001794095_10841_SAT	8561961	A	T	0.0513165	0.26	0.0109268	0.00914923	1.0726	0.0700819	0.058681
1	ctg7180001794095_10813_SCT	8561989	T	C	0.0513165	0.26	0.0109268	0.00914923	1.0726	0.0700819	0.058681
1	ctg7180001794095_10040_SAT	8562762	T	A	0.0239567	0.34	-0.00642013	0.0132417	0.958373	-0.0425185	0.0876955
1	ctg7180001794095_10009_SAT	8562793	A	T	0.0232402	0.29	-0.00841756	0.0134419	0.945564	-0.055974	0.0893841
1	ctg7180001402299_2616_SAG	8577886	A	G	0.454102	0.36	0.00135224	0.00405264	1.00888	0.00884041	0.0264946
1	ctg7180001431282_3120_SGT	8592985	G	T	0.222371	0.32	-0.00262441	0.00484014	0.982934	-0.0172131	0.0317458
1	ctg7180001849710_19123_SAG	8598106	A	G	0.046973	0.51	0.00800361	0.00954618	1.05294	0.0515868	0.0615293
1	ctg7180001849710_18701_SGT	8598528	T	G	0.0153591	0.87	-0.00133372	0.0164726	0.991294	-0.00874457	0.108003
1	ctg7180001849710_16827_SAC	8600609	A	C	0.45043	0.71	0.00133097	0.0040456	1.00874	0.00870122	0.0264481
1	ctg7180001849710_16497_SCT	8600939	C	T	0.30172	0.53	0.000369392	0.00438384	1.00242	0.00241481	0.0286583
1	ctg7180001849710_14579_SAG	8602857	A	G	0.30172	0.53	0.000369392	0.00438384	1.00242	0.00241481	0.0286583
1	ctg7180001849710_14500_SAG	8602936	G	A	0.232626	0.31	-0.00198435	0.00476583	0.98708	-0.0130044	0.0312328
1	ctg7180001849710_12870_SGT	8604573	T	G	0.0149561	0.67	-0.00478225	0.0168096	0.96892	-0.0315732	0.11098
1	ctg7180001849710_7708_SAG	8609735	G	A	0.298227	0.33	0.00353606	0.00626622	1.02332	0.0230571	0.0408592
1	ctg7180001881349_2085_SAG	8623101	A	G	0.0611231	0.87	0.00404999	0.00846435	1.02664	0.0262948	0.0549554
1	ctg7180001881349_1821_SGT	8623365	T	G	0.0145979	0.82	-0.00109649	0.0171552	0.99284	-0.0071858	0.112426
1	ctg7180001894565_3919_SAC	8630422	C	A	0.218162	0.43	-0.00116359	0.00487987	0.99241	-0.00761919	0.0319534
1	ctg7180001808817_2960_SAC	8648568	A	C	0.0150905	0.069	0.0279606	0.0177062	1.1897	0.173703	0.109998
1	ctg7180001808817_2301_SAC	8649227	C	A	0.213237	0.99	0.00364196	0.0067877	1.024	0.0237158	0.0442002
1	ctg7180001794666_6542_SAC	8659924	C	A	0.0314347	0.22	0.015791	0.0115917	1.10553	0.100323	0.0736438
1	ctg7180001794666_5940_SCT	8660526	T	C	0.0314347	0.22	0.015791	0.0115917	1.10553	0.100323	0.0736438
1	ctg7180001794666_5811_SAT	8660655	T	A	0.185698	0.2	-0.00413197	0.00518187	0.9732	-0.0271653	0.0340677
1	ctg7180001794666_3979_SGT	8662487	G	T	0.302123	0.5	0.0005522	0.00438287	1.00362	0.00360935	0.0286478
1	ctg7180001794666_3889_SAG	8662577	G	A	0.349364	0.3	0.00255254	0.00422465	1.01681	0.0166659	0.0275833
1	ctg7180001893096_2268_SCT	8679147	C	T	0.0304496	0.0047	0.0298024	0.0117557	1.20309	0.184896	0.0729331
1	ctg7180001893095_609_SAG	8686629	A	G	0.472237	0.77	-0.000569288	0.00403788	0.996284	-0.00372294	0.0264063
1	ctg7180001867513_8322_SAC	8695355	C	A	0.472237	0.77	-0.000569288	0.00403788	0.996284	-0.00372294	0.0264063
1	ctg7180001867513_7510_SCT	8696167	C	T	0.300466	0.92	0.00397307	0.00632827	1.02624	0.0258986	0.041251
1	ctg7180001357174_1366_SCT	8712932	C	T	0.434802	0.41	0.00632652	0.00575714	1.04217	0.0413069	0.0375894
1	ctg7180001357174_1404_SCT	8712970	C	T	0.433145	0.56	0.00507505	0.00574283	1.0337	0.0331441	0.0375052
1	ctg7180001579437_1061_SAG	8719368	G	A	0.434668	0.5	0.00501594	0.00578145	1.0333	0.0327595	0.0377591
1	ctg7180001857584_40_SCT	8732974	T	C	0.200699	0.027	0.00586162	0.00503166	1.0388	0.0380629	0.0326735
1	ctg7180001857584_239_SCT	8733173	T	C	0.200699	0.027	0.00586162	0.00503166	1.0388	0.0380629	0.0326735
1	ctg7180001857584_1052_SAC	8733986	A	C	0.289629	0.029	-0.00670151	0.00444342	0.956875	-0.044083	0.0292291
1	ctg7180001857584_3123_SCT	8735763	T	C	0.289629	0.029	-0.00670151	0.00444342	0.956875	-0.044083	0.0292291
1	ctg7180001857584_10213_SGT	8742853	G	T	0.184847	0.25	-0.00415366	0.00518377	0.97306	-0.027309	0.0340817
1	ctg7180001857584_10330_SAG	8742970	G	A	0.184847	0.25	-0.00415366	0.00518377	0.97306	-0.027309	0.0340817
1	ctg7180001857584_12070_SAC	8744710	C	A	0.104782	0.077	-0.00803626	0.00659361	0.948141	-0.0532525	0.0436927
1	ctg7180001857584_12690_SGT	8745330	T	G	0.192728	0.34	-0.00319707	0.00511392	0.979228	-0.0209911	0.0335767
1	ctg7180001857584_13042_SCT	8745682	C	T	0.0871843	0.00064	0.0198702	0.00719893	1.13417	0.125899	0.0456129
1	ctg7180001857584_13663_SCT	8746303	C	T	0.189907	0.3	-0.0039724	0.00513355	0.974229	-0.0261089	0.0337407
1	ctg7180001857584_13946_SAG	8746586	A	G	0.184936	0.22	-0.0044211	0.0051828	0.971341	-0.0290776	0.0340873
1	ctg7180001857584_14591_SGT	8747231	T	G	0.184936	0.22	-0.0044211	0.0051828	0.971341	-0.0290776	0.0340873
1	ctg7180001857584_15042_SGT	8747682	T	G	0.184981	0.23	-0.00441686	0.00518269	0.971368	-0.0290495	0.0340864
1	ctg7180001857584_15115_SAG	8747755	A	G	0.184981	0.23	-0.00441686	0.00518269	0.971368	-0.0290495	0.0340864
1	ctg7180001857584_15739_SAG	8748379	A	G	0.20043	0.14	-0.00514884	0.00508577	0.966682	-0.0338856	0.0334705
1	ctg7180001857584_16112_SGT	8748752	T	G	0.184936	0.22	-0.0044211	0.0051828	0.971341	-0.0290776	0.0340873
1	ctg7180001857584_16581_SAG	8749221	A	G	0.184936	0.22	-0.0044211	0.0051828	0.971341	-0.0290776	0.0340873
1	ctg7180001344741_989_SCT	8752702	C	T	0.184936	0.22	-0.0044211	0.0051828	0.971341	-0.0290776	0.0340873
1	ctg7180001344741_3212_SAG	8754925	A	G	0.107648	0.027	-0.0102742	0.00649534	0.933949	-0.0683338	0.0432006
1	ctg7180001344741_3492_SAG	8755205	A	G	0.185071	0.23	-0.00437887	0.00518403	0.971613	-0.0287982	0.0340934
1	ctg7180001879381_288_SAG	8769505	A	G	0.33208	0.021	-0.0079617	0.00428555	0.948987	-0.0523604	0.0281841
1	ctg7180001879381_1033_SGT	8770250	T	G	0.344797	0.054	-0.00974067	0.00610497	0.937899	-0.0641131	0.0401829
1	ctg7180001879381_2480_SGT	8771697	T	G	0.189683	0.87	0.00165776	0.00514075	1.01088	0.0108179	0.0335465
1	ctg7180001829058_7111_SAG	8793313	G	A	0.197116	0.23	-0.00358247	0.00505949	0.976743	-0.0235317	0.0332336
1	ctg7180001829058_7260_SCT	8793462	C	T	0.197116	0.23	-0.00358247	0.00505949	0.976743	-0.0235317	0.0332336
1	ctg7180001829058_7580_SAC	8793782	A	C	0.235402	0.0044	0.00872657	0.0047468	1.05818	0.0565481	0.0307592
1	ctg7180001311556_234_SAC	8806105	A	C	0.317706	0.027	-0.00793961	0.00433466	0.949102	-0.0522387	0.0285199
1	ctg7180001916505_4414_SCT	8813147	T	C	0.0909905	0.14	0.00760006	0.00995116	1.05031	0.0490867	0.0642717
1	ctg7180001916505_510_SGT	8817051	G	T	0.375336	0.075	-0.00600923	0.00417522	0.961346	-0.0394211	0.0273898
1	ctg7180001916505_64_SCT	8817497	C	T	0.372425	0.05	-0.00647694	0.004178	0.958387	-0.0425036	0.0274173
1	ctg7180001243515_2691_SAC	8836196	A	C	0.108006	0.041	-0.00938273	0.00649493	0.939592	-0.0623094	0.0431319
1	ctg7180001396376_260_SAC	8839172	A	C	0.487059	0.0014	-0.0151409	0.00578511	0.905589	-0.0991699	0.0378913
1	ctg7180001396376_1284_SGT	8840196	T	G	0.0896024	0.003	0.018034	0.00706563	1.12143	0.114601	0.0449001
1	ctg7180001396376_1952_SAC	8840864	C	A	0.431444	0.47	-0.00090238	0.00406853	0.994115	-0.00590236	0.0266118
1	ctg7180001396376_2371_SAG	8841283	A	G	0.430817	0.39	-0.00126156	0.00406925	0.991781	-0.0082526	0.0266193
1	ctg7180001522977_7440_SAG	8842887	A	G	0.431444	0.47	-0.00090238	0.00406853	0.994115	-0.00590236	0.0266118
1	ctg7180001522977_6603_SCT	8843724	T	C	0.452355	0.068	0.00424841	0.00404755	1.02815	0.0277602	0.0264477
1	ctg7180001522977_5168_SGT	8845159	G	T	0.0422712	0.71	0.00517741	0.0100062	1.0341	0.0335355	0.064813
1	ctg7180001522977_4432_SCT	8846030	C	T	0.455221	0.059	0.00452286	0.0040542	1.02999	0.0295537	0.0264914
1	ctg7180001522977_4266_SAG	8846196	A	G	0.381694	0.33	-0.00579189	0.00596596	0.962727	-0.037985	0.0391266
1	ctg7180001522977_2205_SCT	8848257	T	C	0.453744	0.058	0.00444394	0.00405071	1.02946	0.0290376	0.0264682
1	ctg7180001895114_11147_SGT	8860465	T	G	0.116604	0.11	-0.00765211	0.00626955	0.950607	-0.0506551	0.0415029
1	ctg7180001895114_6053_SAG	8865559	A	G	0.115261	0.099	-0.00804345	0.00630119	0.948112	-0.0532822	0.041741
1	ctg7180001895114_5956_SCT	8865656	C	T	0.115261	0.099	-0.00804345	0.00630119	0.948112	-0.0532822	0.041741
1	ctg7180001895114_5732_SAG	8865880	A	G	0.115261	0.099	-0.00804345	0.00630119	0.948112	-0.0532822	0.041741
1	ctg7180001895114_5119_SCT	8866493	C	T	0.118485	0.045	-0.00999865	0.0062289	0.935719	-0.0664401	0.0413905
1	ctg7180001895114_5004_SGT	8866608	T	G	0.11535	0.12	-0.00768843	0.00629907	0.950373	-0.0509006	0.0417024
1	ctg7180001895114_4702_SAC	8866910	C	A	0.116604	0.11	-0.00765211	0.00626955	0.950607	-0.0506551	0.0415029
1	ctg7180001895114_4520_SGT	8867092	G	T	0.150322	0.067	-0.00642208	0.00563179	0.958496	-0.0423896	0.0371732
1	ctg7180001895114_3856_SCT	8867756	C	T	0.150099	0.075	-0.00621713	0.00563475	0.959806	-0.0410245	0.0371816
1	ctg7180001895114_1808_SAG	8869804	G	A	0.098379	0.38	-0.00384163	0.00676226	0.975035	-0.0252815	0.044502
1	ctg7180001671497_353_SAC	8872447	C	A	0.267419	0.017	-0.00741806	0.0045467	0.952313	-0.0488615	0.0299483
1	ctg7180001677535_3063_SAC	8876369	C	A	0.081587	0.0071	0.0161522	0.00735312	1.10836	0.102883	0.0468362
1	ctg7180001677535_3404_SCT	8876710	C	T	0.081587	0.0071	0.0161522	0.00735312	1.10836	0.102883	0.0468362
1	ctg7180001677535_5124_SGT	8878430	G	T	0.081587	0.0071	0.0161522	0.00735312	1.10836	0.102883	0.0468362
1	ctg7180001677535_5351_SAC	8878657	A	C	0.115529	0.073	-0.00883074	0.00629482	0.943109	-0.058573	0.0417526
1	ctg7180001842625_369_SCT	8882278	T	C	0.0822139	0.0034	0.0172036	0.00732751	1.11562	0.109406	0.0465992
1	ctg7180001842625_2040_SCT	8883949	T	C	0.149337	0.089	-0.00586116	0.00564707	0.962082	-0.0386559	0.0372439
1	ctg7180001842625_2298_SAG	8884207	G	A	0.149337	0.089	-0.00586116	0.00564707	0.962082	-0.0386559	0.0372439
1	ctg7180001842625_2369_SGT	8884278	G	T	0.149337	0.089	-0.00586116	0.00564707	0.962082	-0.0386559	0.0372439
1	ctg7180001842625_3115_SAG	8885023	A	G	0.0821691	0.014	0.0147587	0.00733042	1.0988	0.0942143	0.0467948
1	ctg7180001910126_1367_SAG	8888200	A	G	0.115798	0.085	-0.00860309	0.00628847	0.944555	-0.057041	0.0416944
1	ctg7180001910126_1701_SAG	8888534	A	G	0.115798	0.085	-0.00860309	0.00628847	0.944555	-0.057041	0.0416944
1	ctg7180001910126_2489_SAG	8889322	A	G	0.115798	0.085	-0.00860309	0.00628847	0.944555	-0.057041	0.0416944
1	ctg7180001838355_7518_SAC	8911058	A	C	0.215834	0.033	0.00558548	0.00489175	1.03696	0.0362939	0.0317861
1	ctg7180001838355_7468_SCT	8911108	C	T	0.21561	0.77	-2.83455e-05	0.00715076	0.999815	-0.000185363	0.0467619
1	ctg7180001838355_6197_SAG	8912403	A	G	0.21449	0.028	0.00569783	0.00490351	1.03771	0.0370182	0.0318576
1	ctg7180001838355_2762_SAC	8915661	A	C	0.10129	0.06	0.0114242	0.00668574	1.07614	0.0733769	0.0429421
1	ctg7180001838355_2505_SCT	8915918	T	C	0.259896	0.0085	-0.00889865	0.00458962	0.942973	-0.0587181	0.0302848
1	ctg7180001838355_2205_SCT	8916218	T	C	0.259896	0.0085	-0.00889865	0.00458962	0.942973	-0.0587181	0.0302848
1	ctg7180001838355_1978_SCT	8916445	T	C	0.254075	0.0058	-0.00980758	0.00462268	0.937261	-0.0647931	0.0305394
1	ctg7180001395158_594_SCT	8920099	C	T	0.216058	0.69	-0.000736668	0.00714131	0.99519	-0.00482135	0.0467385
1	ctg7180001396656_131_SCT	8923035	C	T	0.183503	0.23	-0.00459757	0.00520153	0.970207	-0.0302461	0.0342194
1	ctg7180001911347_3742_SCG	8933787	G	C	0.116156	0.14	-0.00755584	0.00628003	0.951219	-0.0500106	0.0415663
1	ctg7180001911347_2609_SCG	8934920	C	G	0.0265538	0.98	0.00473663	0.0126088	1.03117	0.0306958	0.0817115
1	ctg7180001911347_2533_SAG	8934996	G	A	0.116156	0.14	-0.00755584	0.00628003	0.951219	-0.0500106	0.0415663
1	ctg7180001796402_402_SAC	8950582	A	C	0.0819004	0.02	0.0145007	0.00734794	1.09703	0.0926032	0.0469248
1	ctg7180001431649_1236_SCT	8958446	C	T	0.276509	0.056	-0.00707004	0.00456759	0.954526	-0.0465405	0.0300674
1	ctg7180001431649_181_SCT	8959498	C	T	0.311257	0.01	-0.0130004	0.00635354	0.917664	-0.0859239	0.0419926
1	ctg7180001560541_306_SCT	9002179	T	C	0.146919	0.23	-0.00534652	0.00572534	0.965377	-0.0352367	0.0377334
1	ctg7180001560541_955_SAG	9002828	A	G	0.116156	0.15	-0.00746047	0.00628003	0.951827	-0.0493717	0.0415598
1	ctg7180001844478_10474_SCT	9038402	T	C	0.242656	0.0069	0.00786841	0.00470043	1.05237	0.0510432	0.0304922
1	ctg7180001922677_318_SCT	9052235	T	C	0.223804	0.0085	-0.00970397	0.00482844	0.937837	-0.0641791	0.0319338
1	ctg7180001922676_8441_SGT	9054174	G	T	0.242656	0.0074	0.00774581	0.00470043	1.05154	0.050254	0.0304959
1	ctg7180001889739_3606_SGT	9061262	T	G	0.3066	0.0014	-0.0107113	0.00442916	0.93177	-0.0706692	0.029222
1	ctg7180001869125_6153_SAG	9061464	G	A	0.214938	0.017	0.00653147	0.00489914	1.04331	0.0423954	0.0318001
1	ctg7180001800307_1651_SAG	9062678	A	G	0.330647	0.0032	-0.009667	0.00427895	0.938323	-0.0636606	0.0281784
1	ctg7180001825946_801_SAG	9063965	G	A	0.116156	0.13	-0.00764286	0.00628003	0.950665	-0.0505938	0.0415722
1	ctg7180001825946_1509_SAG	9064673	A	G	0.116156	0.13	-0.00764286	0.00628003	0.950665	-0.0505938	0.0415722
1	ctg7180001825946_1551_SAG	9064715	A	G	0.317123	0.0012	0.00952974	0.00432489	1.06385	0.0618974	0.0280909
1	ctg7180001825946_3712_SAG	9066876	G	A	0.43328	0.039	0.00520749	0.00406146	1.03459	0.034008	0.0265238
1	ctg7180001825946_5990_SCT	9069154	T	C	0.31775	0.00069	0.0099246	0.00432261	1.06657	0.0644466	0.0280694
1	ctg7180001825946_6260_SCT	9069424	T	C	0.266792	0.64	0.00213757	0.00455166	1.01405	0.0139499	0.0297044
1	ctg7180001825946_6651_SCT	9069815	T	C	0.116156	0.13	-0.00764286	0.00628003	0.950665	-0.0505938	0.0415722
1	ctg7180001825946_6676_SCT	9069840	C	T	0.0403905	0.94	0.00327263	0.0102326	1.0215	0.0212709	0.0665081
1	ctg7180001825946_9905_SAG	9073069	G	A	0.156547	0.19	-0.00498745	0.00553944	0.967687	-0.0328462	0.0364815
1	ctg7180001825946_10126_SAG	9073290	A	G	0.422712	0.5	-0.00134497	0.0040741	0.99124	-0.00879883	0.0266529
1	ctg7180001825946_10175_SCT	9073339	T	C	0.0403905	0.94	0.00327263	0.0102326	1.0215	0.0212709	0.0665081
1	ctg7180001917064_18928_SGT	9082407	G	T	0.0403905	0.94	0.00327263	0.0102326	1.0215	0.0212709	0.0665081
1	ctg7180001917064_18696_SAG	9082639	A	G	0.156547	0.19	-0.00498745	0.00553944	0.967687	-0.0328462	0.0364815
1	ctg7180001917064_18648_SAC	9082687	A	C	0.273912	0.89	3.62554e-06	0.00452708	1.00002	2.37081e-05	0.0296035
1	ctg7180001917064_18504_SCT	9082831	T	C	0.156547	0.19	-0.00498745	0.00553944	0.967687	-0.0328462	0.0364815
1	ctg7180001917064_17297_SAG	9084038	A	G	0.116156	0.13	-0.00764286	0.00628003	0.950665	-0.0505938	0.0415722
1	ctg7180001917064_15846_SAG	9085489	G	A	0.152696	0.18	-0.00563279	0.00559808	0.963547	-0.0371343	0.0369055
1	ctg7180001917064_15804_SAG	9085531	A	G	0.115485	0.11	-0.00797542	0.00630072	0.948546	-0.0528252	0.0417329
1	ctg7180001917064_14904_SCT	9086431	C	T	0.42813	0.0081	-0.013322	0.00601264	0.916207	-0.0875125	0.0394971
1	ctg7180001917064_14595_SAG	9086740	A	G	0.15274	0.18	-0.00571418	0.0056008	0.963026	-0.0376753	0.0369278
1	ctg7180001917064_13329_SGT	9088006	T	G	0.0196131	0.068	0.0272786	0.0146481	1.185	0.169745	0.0911498
1	ctg7180001917064_12982_SGT	9088353	G	T	0.108365	0.038	0.0116723	0.00648093	1.07785	0.074967	0.0416247
1	ctg7180001917064_12435_SAG	9088900	A	G	0.116246	0.12	-0.00765266	0.00627793	0.950602	-0.0506593	0.0415589
1	ctg7180001917064_8907_SCT	9092428	T	C	0.116246	0.12	-0.00765266	0.00627793	0.950602	-0.0506593	0.0415589
1	ctg7180001917064_6904_SCT	9094432	C	T	0.275613	0.57	-0.00309665	0.00645498	0.979897	-0.0203079	0.0423318
1	ctg7180001917064_3998_SCT	9097338	C	T	0.168995	0.78	0.00259923	0.00539361	1.01708	0.016938	0.0351476
1	ctg7180001917064_2311_SAC	9099025	C	A	0.238492	0.28	-0.0040352	0.00472401	0.973846	-0.0265026	0.0310265
1	ctg7180001580179_664_SCT	9122999	C	T	0.116246	0.12	-0.00765266	0.00627793	0.950602	-0.0506593	0.0415589
1	ctg7180001860719_12896_SGT	9135853	T	G	0.116873	0.18	-0.00676686	0.0062633	0.956256	-0.0447299	0.0414013
1	ctg7180001860719_12719_SCT	9136030	C	T	0.116873	0.18	-0.00676686	0.0062633	0.956256	-0.0447299	0.0414013
1	ctg7180001860719_11882_SCT	9136867	T	C	0.45352	0.29	0.00157443	0.00404336	1.01035	0.0102926	0.0264328
1	ctg7180001860719_10400_SAG	9138349	A	G	0.409905	0.42	-0.00110591	0.0040925	0.992791	-0.00723475	0.0267727
1	ctg7180001860719_10224_SCT	9138525	C	T	0.116873	0.18	-0.00676686	0.0062633	0.956256	-0.0447299	0.0414013
1	ctg7180001860719_9972_SAG	9138777	A	G	0.0197474	0.034	0.0293355	0.014471	1.19951	0.181916	0.0897381
1	ctg7180001860719_9833_SGT	9138916	G	T	0.473849	0.073	0.00422796	0.004031	1.02802	0.0276369	0.0263494
1	ctg7180001860719_9575_SAC	9139174	C	A	0.116246	0.12	-0.00765266	0.00627793	0.950602	-0.0506593	0.0415589
1	ctg7180001860719_9250_SAC	9139499	A	C	0.117141	0.2	-0.00641684	0.00625842	0.958494	-0.0423918	0.0413452
1	ctg7180001860718_2511_SAC	9155127	C	A	0.283181	0.028	-0.0070009	0.00446665	0.954972	-0.0460735	0.0293954
1	ctg7180001860718_2506_SGT	9155132	T	G	0.4554	0.22	0.00221003	0.00404526	1.01455	0.0144463	0.0264427
1	ctg7180001860718_2190_SGT	9155448	T	G	0.10832	0.15	-0.00646688	0.00647534	0.958164	-0.0427359	0.0427918
1	ctg7180001860718_2168_SAC	9155470	A	C	0.33405	0.033	0.00936527	0.00603337	1.06277	0.0608749	0.0392173
1	ctg7180001860718_2089_SAC	9155549	C	A	0.283136	0.022	-0.00725319	0.00446711	0.953377	-0.0477452	0.0294054
1	ctg7180001860718_1927_SCT	9155711	T	C	0.10832	0.15	-0.00646688	0.00647534	0.958164	-0.0427359	0.0427918
1	ctg7180001919545_27141_SGT	9158681	T	G	0.196803	0.67	-0.000438968	0.00506217	0.997132	-0.00287207	0.0331206
1	ctg7180001919545_27075_SCT	9158747	T	C	0.0314795	0.21	0.0144585	0.0115282	1.09644	0.0920725	0.0734122
1	ctg7180001919545_26444_SCT	9159378	T	C	0.0195683	0.026	0.0309398	0.0145358	1.21088	0.191349	0.0898975
1	ctg7180001919545_25853_SCT	9159969	C	T	0.404084	0.74	0.00233063	0.00410476	1.01534	0.0152269	0.026818
1	ctg7180001919545_25362_SAG	9160460	A	G	0.384515	0.76	-0.000139035	0.00414075	0.999091	-0.00090924	0.027079
1	ctg7180001919545_25157_SCT	9160665	C	T	0.422264	0.067	-0.00908056	0.00572992	0.942171	-0.0595687	0.0375884
1	ctg7180001919545_24307_SCT	9161515	C	T	0.0195683	0.026	0.0309398	0.0145358	1.21088	0.191349	0.0898975
1	ctg7180001919545_24194_SCT	9161628	C	T	0.383217	0.58	-0.000848388	0.00414084	0.994465	-0.00555005	0.0270889
1	ctg7180001919545_22116_SAG	9163706	A	G	0.177279	0.21	-0.00455057	0.00527006	0.970505	-0.0299385	0.0346721
1	ctg7180001919545_22072_SAG	9163750	A	G	0.402785	0.93	0.00163332	0.00410441	1.01073	0.0106738	0.0268225
1	ctg7180001919545_22034_SCT	9163788	T	C	0.383844	0.68	-0.000476499	0.00413956	0.996888	-0.00311664	0.0270756
1	ctg7180001919545_21705_SCT	9164117	T	C	0.0892889	0.014	0.0149706	0.00706027	1.10029	0.0955759	0.0450745
1	ctg7180001919545_21321_SAG	9164501	A	G	0.0900054	0.0085	0.0157189	0.00703485	1.10544	0.100243	0.0448628
1	ctg7180001919545_18021_SAG	9167801	A	G	0.357245	0.67	0.000141678	0.00420247	1.00093	0.000926387	0.0274786
1	ctg7180001919545_18015_SAC	9167807	C	A	0.357245	0.67	0.000141678	0.00420247	1.00093	0.000926387	0.0274786
1	ctg7180001919545_16764_SAC	9169058	A	C	0.357245	0.67	0.000141678	0.00420247	1.00093	0.000926387	0.0274786
1	ctg7180001919545_13630_SCT	9172192	T	C	0.117141	0.41	-0.00439522	0.00625706	0.971473	-0.0289418	0.0412016
1	ctg7180001919545_11137_SAG	9174685	G	A	0.146024	0.015	-0.0108789	0.0057069	0.930247	-0.0723051	0.0379301
1	ctg7180001919545_6279_SGT	9179543	T	G	0.368126	0.78	0.000413819	0.00602109	1.00271	0.00270545	0.0393645
1	ctg7180001919545_5929_SGT	9179893	G	T	0.116246	0.14	-0.00726014	0.00628067	0.953105	-0.04803	0.0415503
1	ctg7180001919545_5558_SAC	9180264	C	A	0.116067	0.14	-0.00733519	0.00628214	0.952626	-0.0485328	0.0415653
1	ctg7180001919545_5443_SCT	9180379	T	C	0.0194788	0.024	0.0314871	0.0145686	1.21477	0.194555	0.0900176
1	ctg7180001919545_5304_SAG	9180518	G	A	0.116067	0.14	-0.00733519	0.00628214	0.952626	-0.0485328	0.0415653
1	ctg7180001919545_4290_SCT	9181532	T	C	0.116067	0.14	-0.00733519	0.00628214	0.952626	-0.0485328	0.0415653
1	ctg7180001928654_278_SCT	9191044	T	C	0.116067	0.14	-0.00733519	0.00628214	0.952626	-0.0485328	0.0415653
1	ctg7180001660967_190_SCT	9191641	T	C	0.116067	0.14	-0.00733519	0.00628214	0.952626	-0.0485328	0.0415653
1	ctg7180001660967_1062_SCT	9192513	T	C	0.116067	0.14	-0.00733519	0.00628214	0.952626	-0.0485328	0.0415653
1	ctg7180001660967_1153_SAC	9192604	A	C	0.116694	0.2	-0.00644968	0.00626746	0.958284	-0.0426115	0.0414076
1	ctg7180001590124_95_SAG	9194598	G	A	0.116067	0.14	-0.00733519	0.00628214	0.952626	-0.0485328	0.0415653
1	ctg7180001335639_11998_SAG	9196821	A	G	0.361051	0.23	-0.00769214	0.00633182	0.950724	-0.0505314	0.0415951
1	ctg7180001335639_8362_SCT	9200457	T	C	0.357648	0.035	-0.00669326	0.00419957	0.957005	-0.0439463	0.0275734
1	ctg7180001335639_5957_SCT	9202862	C	T	0.473715	0.0029	-0.00918791	0.00403124	0.941615	-0.0601591	0.0263951
1	ctg7180001335639_2699_SCT	9206120	T	C	0.474342	0.0045	-0.00883457	0.00403098	0.9438	-0.0578407	0.0263912
1	ctg7180001335639_2275_SAG	9206544	A	G	0.358275	0.049	-0.00630616	0.00419794	0.959451	-0.041394	0.0275555
1	ctg7180001335639_2234_SAG	9206585	A	G	0.116067	0.14	-0.00733519	0.00628214	0.952626	-0.0485328	0.0415653
1	ctg7180001932885_3878_SAG	9215457	G	A	0.084005	0.0093	0.0150801	0.00725602	1.10101	0.0962283	0.0463017
1	ctg7180001932885_7799_SCT	9219378	C	T	0.333602	0.033	-0.00637295	0.00426766	0.959003	-0.0418611	0.0280324
1	ctg7180001932885_9644_SGT	9221223	G	T	0.41698	0.48	-0.00141863	0.00408142	0.990762	-0.00928125	0.0267023
1	ctg7180001814148_4590_SAG	9222330	A	G	0.333602	0.033	-0.00637295	0.00426766	0.959003	-0.0418611	0.0280324
1	ctg7180001814148_4419_SCT	9222501	C	T	0.0833781	0.018	0.0140344	0.00728077	1.09384	0.0896984	0.0465337
1	ctg7180001872487_6356_SAG	9246079	A	G	0.269658	0.014	0.00737092	0.00453627	1.04904	0.047878	0.0294655
1	ctg7180001872487_11338_SGT	9251280	T	G	0.0317034	0.22	0.0141453	0.0114845	1.09432	0.090129	0.0731753
1	ctg7180001817203_173_SAC	9288960	A	C	0.223715	0.037	-0.00759442	0.004836	0.951134	-0.0501003	0.031903
1	ctg7180001367358_988_SAG	9302945	A	G	0.188967	0.0087	-0.0161463	0.00747892	0.897722	-0.107895	0.0499764
1	ctg7180001895653_4191_SCT	9312067	T	C	0.013971	0.043	0.0459478	0.0244189	1.31938	0.277162	0.147297
1	ctg7180001895653_6132_SAG	9314008	A	G	0.409816	0.0045	-0.00888878	0.00409302	0.943336	-0.0583327	0.0268605
1	ctg7180001895653_6296_SAG	9314172	A	G	0.409457	0.004	-0.00899113	0.00409205	0.942699	-0.0590078	0.0268557
1	ctg7180001895653_7055_SAG	9314931	G	A	0.410084	0.0062	-0.00862421	0.00409109	0.944982	-0.0565894	0.0268445
1	ctg7180001795618_5163_SAG	9327928	A	G	0.320482	0.59	0.00288757	0.00431301	1.01902	0.0188432	0.0281451
1	ctg7180001795618_7726_SCT	9330491	T	C	0.226715	0.053	0.00461647	0.00480667	1.03049	0.030036	0.0312734
1	ctg7180001795618_8047_SCT	9330812	T	C	0.227342	0.036	0.0051072	0.00480198	1.03377	0.0332117	0.0312269
1	ctg7180001510349_2330_SAG	9347189	A	G	0.456923	0.11	0.00378071	0.00404051	1.02502	0.0247077	0.0264056
1	ctg7180001363912_4501_SAG	9352011	A	G	0.22976	0.026	-0.00769593	0.00478353	0.950501	-0.0507664	0.0315547
1	ctg7180001363912_5087_SAG	9352597	G	A	0.450833	0.072	0.00416763	0.0040451	1.02761	0.027232	0.0264314
1	ctg7180001363912_6118_SCT	9353628	T	C	0.0698997	0.75	0.00409773	0.00789574	1.02696	0.0266064	0.0512668
1	ctg7180001810056_2979_SAG	9368644	A	G	0.246194	0.011	0.00742041	0.00467149	1.04934	0.0481634	0.0303211
1	ctg7180001921683_3927_SCT	9374800	T	C	0.259672	0.78	0.00180518	0.0045901	1.01185	0.0117838	0.029963
1	ctg7180001921683_3128_SCT	9375599	T	C	0.242074	0.73	0.00189356	0.00469825	1.01243	0.012358	0.0306622
1	ctg7180001894817_6759_SAC	9407772	A	C	0.0840498	0.0062	0.0158171	0.0072532	1.10607	0.100816	0.046231
1	ctg7180001934569_7105_SAG	9419209	A	G	0.440758	0.99	0.00114516	0.0058346	1.00751	0.00748641	0.0381433
1	ctg7180001934569_7457_SAC	9419561	C	A	0.462431	0.0028	0.00850937	0.00411843	1.05716	0.0555865	0.0269032
1	ctg7180001934569_9474_SCT	9421578	T	C	0.311705	0.84	-0.0011766	0.00647197	0.992329	-0.00770103	0.0423601
1	ctg7180001934569_9754_SCT	9421858	C	T	0.390561	0.19	0.00265765	0.00413102	1.01751	0.0173588	0.0269823
1	ctg7180001798128_9888_SCT	9453004	C	T	0.389665	0.22	0.00240604	0.00413664	1.01584	0.0157169	0.0270217
1	ctg7180001798128_9948_SAG	9453064	A	G	0.389038	0.28	0.00203639	0.00413785	1.01339	0.0133043	0.0270338
1	ctg7180001933542_751_SAG	9467554	A	G	0.432071	0.00025	-0.0110271	0.00406596	0.930195	-0.0723609	0.0266812
1	ctg7180001933542_1743_SAG	9468547	A	G	0.447161	0.095	0.00788286	0.00603986	1.05282	0.0514717	0.0394377
1	ctg7180001933542_9017_SCT	9476042	T	C	0.434802	0.0045	-0.00882471	0.00409313	0.943784	-0.0578584	0.0268362
1	ctg7180001933542_9275_SAG	9476300	A	G	0.489164	0.38	0.00419241	0.00600876	1.02779	0.0274117	0.0392878
1	ctg7180001844410_7052_SCT	9480397	T	C	0.391322	0.32	0.00182648	0.00412433	1.01201	0.0119342	0.0269484
1	ctg7180001844410_7171_SCT	9480516	C	T	0.391322	0.32	0.00182648	0.00412433	1.01201	0.0119342	0.0269484
1	ctg7180001844410_7600_SAC	9480945	C	A	0.391322	0.32	0.00182648	0.00412433	1.01201	0.0119342	0.0269484
1	ctg7180001844410_8141_SGT	9481486	G	T	0.391322	0.32	0.00182648	0.00412433	1.01201	0.0119342	0.0269484
1	ctg7180001805493_597_SAG	9487161	A	G	0.106439	0.2	-0.00582771	0.00652543	0.962258	-0.0384729	0.0430791
1	ctg7180001805493_810_SAG	9487374	A	G	0.391949	0.26	0.00219387	0.00412315	1.01444	0.0143326	0.0269366
1	ctg7180001805493_2814_SAC	9489378	A	C	0.391949	0.26	0.00219387	0.00412315	1.01444	0.0143326	0.0269366
1	ctg7180001800817_6745_SGT	9499908	T	G	0.479357	0.048	0.00546937	0.0040291	1.0364	0.0357528	0.0263378
1	ctg7180001735706_97_SGT	9508830	G	T	0.405965	0.14	0.0034948	0.00409904	1.02309	0.0228237	0.0267698
1	ctg7180001429083_1709_SAC	9511420	C	A	0.491223	0.025	0.0063449	0.0040261	1.04236	0.0414872	0.0263253
1	ctg7180001901233_12541_SGT	9525429	T	G	0.097573	0.65	0.00508209	0.00990903	1.03351	0.0329612	0.0642676
1	ctg7180001901233_11575_SCT	9526395	C	T	0.0836916	0.027	0.0129513	0.00727154	1.08645	0.0829181	0.0465546
1	ctg7180001901233_11269_SAG	9526701	G	A	0.0843185	0.014	0.0140019	0.0072469	1.09363	0.0894999	0.0463221
1	ctg7180001901233_3955_SGT	9534015	G	T	0.0836916	0.027	0.0129513	0.00727154	1.08645	0.0829181	0.0465546
1	ctg7180001901233_3283_SCT	9534687	C	T	0.0843185	0.014	0.0140019	0.0072469	1.09363	0.0894999	0.0463221
1	ctg7180001901233_2607_SAG	9535363	G	A	0.0843185	0.014	0.0140019	0.0072469	1.09363	0.0894999	0.0463221
1	ctg7180001901233_2405_SCT	9535565	T	C	0.106439	0.2	-0.00582771	0.00652543	0.962258	-0.0384729	0.0430791
1	ctg7180001901233_380_SCT	9537590	C	T	0.0962744	0.55	0.00574991	0.0101308	1.03795	0.0372519	0.0656343
1	ctg7180001358765_1227_SCT	9539373	T	C	0.0851693	0.17	0.00918233	0.00721288	1.06093	0.0591447	0.0464592
1	ctg7180001358765_1953_SAG	9540099	A	G	0.0836916	0.025	0.013263	0.00726729	1.08858	0.0848721	0.0465046
1	ctg7180001358765_2142_SAC	9540288	C	A	0.0836916	0.025	0.013263	0.00726729	1.08858	0.0848721	0.0465046
1	ctg7180001478131_4099_SGT	9546398	T	G	0.0836916	0.025	0.013263	0.00726729	1.08858	0.0848721	0.0465046
1	ctg7180001478131_1030_SCT	9549529	C	T	0.0836916	0.025	0.013263	0.00726729	1.08858	0.0848721	0.0465046
1	ctg7180001472704_11171_SAC	9553105	C	A	0.489387	0.19	-0.00310625	0.00402657	0.979889	-0.0203159	0.0263351
1	ctg7180001472704_10796_SCT	9553480	C	T	0.406323	0.014	-0.00707116	0.00409809	0.954686	-0.0463733	0.0268756
1	ctg7180001472704_9943_SAG	9554333	G	A	0.490014	0.24	-0.00275474	0.00402646	0.982145	-0.0180163	0.0263336
1	ctg7180001472704_9827_SCT	9554449	C	T	0.0836916	0.025	0.013263	0.00726729	1.08858	0.0848721	0.0465046
1	ctg7180001472704_9662_SGT	9554614	T	G	0.0258821	0.039	0.0249079	0.0126726	1.16849	0.155714	0.0792239
1	ctg7180001472704_8536_SAG	9555740	A	G	0.139575	0.052	-0.00896113	0.00580698	0.942332	-0.0593977	0.0384908
1	ctg7180001472704_7820_SCT	9556456	T	C	0.406323	0.014	-0.00707116	0.00409809	0.954686	-0.0463733	0.0268756
1	ctg7180001472704_7390_SAC	9556886	C	A	0.0836916	0.025	0.013263	0.00726729	1.08858	0.0848721	0.0465046
1	ctg7180001472704_7054_SAG	9557222	G	A	0.490014	0.24	-0.00275474	0.00402646	0.982145	-0.0180163	0.0263336
1	ctg7180001472704_7040_SCT	9557236	C	T	0.405696	0.0096	-0.00743876	0.00409909	0.952378	-0.0487928	0.026887
1	ctg7180001472704_6771_SCT	9557505	T	C	0.0836916	0.025	0.013263	0.00726729	1.08858	0.0848721	0.0465046
1	ctg7180001472704_5624_SCT	9558652	C	T	0.48997	0.25	-0.00273971	0.00402629	0.982242	-0.017918	0.0263324
1	ctg7180001472704_5262_SCT	9559014	T	C	0.299884	0.077	-0.00548341	0.00439264	0.964619	-0.0360222	0.0288566
1	ctg7180001472704_5146_SAG	9559130	A	G	0.0836916	0.025	0.013263	0.00726729	1.08858	0.0848721	0.0465046
1	ctg7180001472704_4882_SAC	9559394	C	A	0.0836916	0.025	0.013263	0.00726729	1.08858	0.0848721	0.0465046
1	ctg7180001876682_2156_SAG	9566642	G	A	0.405696	0.0098	-0.00743183	0.00409909	0.952422	-0.0487472	0.0268869
1	ctg7180001876682_2641_SGT	9567127	T	G	0.406323	0.015	-0.00706424	0.00409809	0.954729	-0.0463278	0.0268756
1	ctg7180001876682_3112_SAG	9567598	A	G	0.107424	0.26	-0.00523865	0.0065051	0.96604	-0.0345496	0.042902
1	ctg7180001876682_3343_SGT	9567829	T	G	0.406771	0.0016	-0.013711	0.00597248	0.913758	-0.0901897	0.0392864
1	ctg7180001876682_3545_SCT	9568031	T	C	0.406771	0.0016	-0.013711	0.00597248	0.913758	-0.0901897	0.0392864
1	ctg7180001876682_3998_SGT	9568484	T	G	0.0871843	0.029	0.0128468	0.00721341	1.08576	0.0822773	0.0461983
1	ctg7180001876682_8589_SCT	9573075	T	C	0.141411	0.027	-0.0100679	0.00583976	0.935341	-0.0668441	0.0387721
1	ctg7180001876682_9610_SAG	9574096	G	A	0.0867813	0.036	0.0125528	0.00721951	1.08375	0.0804297	0.0462577
1	ctg7180001898666_223_SCT	9578595	C	T	0.305391	8.2e-06	0.0183541	0.00629028	1.12574	0.118438	0.0405908
1	ctg7180001898666_3145_SAG	9581515	A	G	0.404756	0.0088	-0.00747974	0.00410615	0.95212	-0.0490639	0.0269346
1	ctg7180001898666_3380_SGT	9581750	T	G	0.4048	0.0061	-0.00782519	0.00410895	0.949958	-0.0513377	0.026957
1	ctg7180001898666_3482_SAG	9581852	A	G	0.0870948	0.035	0.0114387	0.00718177	1.07618	0.0734207	0.0460971
1	ctg7180001321833_3546_SCT	9586378	C	T	0.49494	0.0068	0.0105556	0.00564064	1.07148	0.0690377	0.036892
1	ctg7180001321833_3297_SAG	9586627	G	A	0.488984	0.13	-0.00370794	0.00403225	0.976039	-0.0242522	0.0263734
1	ctg7180001321833_1102_SCT	9588822	C	T	0.139755	0.043	-0.00925306	0.00580386	0.940484	-0.0613602	0.0384874
1	ctg7180001321833_822_SAC	9589102	A	C	0.0843185	0.013	0.0143103	0.0072427	1.09574	0.0914272	0.0462729
1	ctg7180001321833_730_SGT	9589194	T	G	0.405696	0.019	-0.00666551	0.00410138	0.957235	-0.0437061	0.026893
1	ctg7180001321833_297_SCT	9589627	T	C	0.405382	0.013	-0.00711037	0.00410055	0.954438	-0.0466325	0.026893
1	ctg7180001812171_560_SAG	9590549	G	A	0.0845871	0.016	0.013951	0.00723643	1.09328	0.089183	0.0462595
1	ctg7180001812171_3237_SAC	9593226	A	C	0.0369425	0.26	0.0129161	0.0107051	1.086	0.0824985	0.0683762
1	ctg7180001812171_3298_SGT	9593287	G	T	0.0837363	0.027	0.0131462	0.00726447	1.08778	0.0841403	0.0464952
1	ctg7180001812171_4293_SAC	9594282	A	C	0.488447	0.19	-0.00315095	0.00404034	0.979602	-0.0206085	0.0264255
1	ctg7180001812171_4587_SAC	9594576	A	C	0.467177	0.0056	-0.0111044	0.00566711	0.929829	-0.0727542	0.03713
1	ctg7180001202271_3033_SAC	9599121	C	A	0.0840498	0.014	0.0142624	0.00730223	1.09541	0.0911266	0.046656
1	ctg7180001202271_3004_SCT	9599150	T	C	0.0841394	0.031	0.0126548	0.00725814	1.08444	0.0810595	0.0464915
1	ctg7180001566337_1273_SAG	9605917	G	A	0.487731	0.18	-0.00321729	0.00403393	0.979177	-0.0210427	0.026384
1	ctg7180001912418_3061_SCT	9613888	T	C	0.226312	0.2	-0.00384819	0.00677795	0.975043	-0.025274	0.0445159
1	ctg7180001912418_5943_SAG	9616770	A	G	0.116111	0.12	-0.00773661	0.00628314	0.950067	-0.0512223	0.0415992
1	ctg7180001912418_6362_SCT	9617189	T	C	0.0837363	0.027	0.0131462	0.00726447	1.08778	0.0841403	0.0464952
1	ctg7180001912418_7618_SAG	9618445	A	G	0.187623	0.16	-0.00567576	0.00515405	0.963301	-0.0373895	0.0339527
1	ctg7180001912418_8274_SAG	9619101	G	A	0.422712	0.86	-0.00109476	0.0040741	0.992864	-0.00716137	0.0266507
1	ctg7180001912418_8507_SAG	9619334	A	G	0.433996	1	-0.00163677	0.0040603	0.989349	-0.010708	0.0265631
1	ctg7180001912418_9695_SAG	9620522	A	G	0.0837363	0.027	0.0131462	0.00726447	1.08778	0.0841403	0.0464952
1	ctg7180001912418_9740_SAG	9620567	A	G	0.0843632	0.014	0.0141934	0.0072399	1.09494	0.0906971	0.0462636
1	ctg7180001912418_9889_SAG	9620716	A	G	0.448325	0.42	0.00137089	0.00404643	1.009	0.00896202	0.026453
1	ctg7180001912418_9955_SAG	9620782	A	G	0.0837363	0.027	0.0131462	0.00726447	1.08778	0.0841403	0.0464952
1	ctg7180001912418_10015_SAC	9620842	A	C	0.355991	0.14	-0.00438953	0.00420289	0.97163	-0.0287802	0.0275565
1	ctg7180001912418_19811_SAG	9630676	A	G	0.222819	0.92	4.88268e-06	0.00483541	1.00003	3.19287e-05	0.0316196
1	ctg7180001912418_21359_SCT	9632224	T	C	0.0843632	0.014	0.0141934	0.0072399	1.09494	0.0906971	0.0462636
1	ctg7180001873403_216_SAC	9633012	A	C	0.0837363	0.027	0.0131462	0.00726447	1.08778	0.0841403	0.0464952
1	ctg7180001873403_1445_SCT	9634241	C	T	0.0843632	0.014	0.0141934	0.0072399	1.09494	0.0906971	0.0462636
1	ctg7180001873403_1636_SGT	9634432	G	T	0.352499	0.37	-0.00192335	0.00421225	0.987487	-0.0125919	0.0275771
1	ctg7180001873403_3456_SAG	9636252	A	G	0.0843632	0.014	0.0141934	0.0072399	1.09494	0.0906971	0.0462636
1	ctg7180001804029_4144_SAG	9637758	A	G	0.0843632	0.014	0.0141934	0.0072399	1.09494	0.0906971	0.0462636
1	ctg7180001804029_3677_SCT	9638225	C	T	0.43919	0.73	-0.000358762	0.00405486	0.997657	-0.00234623	0.026518
1	ctg7180001804029_3594_SCT	9638308	T	C	0.0837363	0.027	0.0131462	0.00726447	1.08778	0.0841403	0.0464952
1	ctg7180001804029_3335_SAG	9638567	A	G	0.20043	0.67	0.00171848	0.00502645	1.01128	0.0112141	0.0328006
1	ctg7180001804029_3125_SGT	9638777	G	T	0.0256135	0.048	0.0243271	0.0127486	1.16443	0.152229	0.0797753
1	ctg7180001285736_5101_SAG	9647491	A	G	0.45943	0.53	0.000879697	0.00403808	1.00577	0.00575171	0.0264021
1	ctg7180001285736_5828_SCT	9648218	C	T	0.203609	0.23	-0.00717416	0.00727876	0.95377	-0.0473323	0.0480224
1	ctg7180001285736_6186_SGT	9648576	G	T	0.116067	0.11	-0.0080022	0.00628214	0.948376	-0.0530039	0.0416108
1	ctg7180001900310_70_SAG	9669720	G	A	0.0838259	0.036	0.0126227	0.00726094	1.08422	0.0808567	0.0465111
1	ctg7180001343119_1968_SAG	9674755	A	G	0.0838259	0.036	0.0126227	0.00726094	1.08422	0.0808567	0.0465111
1	ctg7180001343119_947_SCT	9675776	T	C	0.105275	0.031	-0.0182844	0.00944313	0.883959	-0.123345	0.0637024
1	ctg7180001343119_394_SAG	9676203	A	G	0.0839602	0.036	0.0125238	0.00725883	1.08354	0.0802362	0.0465051
1	ctg7180001339323_2586_SAG	9677438	A	G	0.0368082	0.22	0.0138956	0.0107002	1.09265	0.088602	0.0682273
1	ctg7180001339323_128_SCT	9679896	C	T	0.0838259	0.036	0.0126227	0.00726094	1.08422	0.0808567	0.0465111
1	ctg7180001495119_4000_SGT	9701324	G	T	0.116067	0.1	-0.00806294	0.00628214	0.94799	-0.0534116	0.041615
1	ctg7180001356946_3225_SGT	9707971	G	T	0.454505	0.33	0.00208392	0.00404189	1.01372	0.0136222	0.026421
1	ctg7180001356946_1296_SAG	9709864	A	G	0.283718	0.03	0.00552342	0.00446409	1.0366	0.0359477	0.0290534
1	ctg7180001434032_715_SAC	9711963	A	C	0.222148	0.89	0.000108041	0.00484157	1.00071	0.000706417	0.0316562
1	ctg7180001435118_477_SGT	9717392	G	T	0.435429	0.8	0.00208603	0.00405912	1.01373	0.0136337	0.0265293
1	ctg7180001861831_5383_SAG	9750880	A	G	0.21664	0.046	0.00521827	0.00488451	1.0345	0.0339223	0.0317526
1	ctg7180001425425_5659_SCT	9774411	T	C	0.362753	0.83	-0.000990703	0.00418982	0.993539	-0.00648204	0.0274134
1	ctg7180001425425_5635_SAG	9774435	G	A	0.304317	0.11	-0.00921719	0.00629906	0.94107	-0.0607381	0.0415087
1	ctg7180001902517_3733_SAC	9792927	C	A	0.373992	0.9	-0.00198047	0.00415982	0.98712	-0.0129641	0.02723
1	ctg7180001805747_4632_SAG	9821699	A	G	0.0829751	0.049	0.0129081	0.00729791	1.08616	0.0826441	0.0467249
1	ctg7180001805747_5129_SCT	9822196	T	C	0.116067	0.1	-0.00806294	0.00628214	0.94799	-0.0534116	0.041615
1	ctg7180001805747_5260_SAC	9822327	C	A	0.228999	0.49	0.00395811	0.00479002	1.02611	0.0257717	0.0311884
1	ctg7180001316228_931_SAG	9860224	A	G	0.112305	0.018	0.0144368	0.0063758	1.09677	0.0923659	0.040792
1	ctg7180001861831_1211_SAC	9870473	C	A	0.0454057	0.082	0.0181008	0.0138123	1.12148	0.11465	0.0874871
1	ctg7180001919547_2798_SCT	9975803	C	T	0.187757	0.27	0.0082841	0.00728187	1.05508	0.0536193	0.0471323
1	ctg7180001787837_3527_SCT	9995161	T	C	0.091707	0.13	0.0106773	0.00702315	1.07104	0.0686294	0.045142
1	ctg7180001787837_3625_SCT	9995259	T	C	0.0890202	0.2	0.00982632	0.00707379	1.06528	0.0632372	0.0455233
1	ctg7180001787837_4526_SAG	9996160	A	G	0.426921	0.02	0.0061885	0.00406808	1.04123	0.040399	0.0265567
1	ctg7180001505872_4318_SGT	9998611	T	G	0.0890202	0.2	0.00982632	0.00707379	1.06528	0.0632372	0.0455233
1	ctg7180001505872_2335_SAG	10000594	G	A	0.484686	0.0039	-0.00890048	0.00402773	0.943413	-0.058251	0.0263603
1	ctg7180001505872_2107_SAG	10000822	G	A	0.484686	0.0039	-0.00890048	0.00402773	0.943413	-0.058251	0.0263603
1	ctg7180001505872_1191_SCT	10001738	T	C	0.426294	0.029	0.00583204	0.00406885	1.03881	0.0380749	0.0265638
1	ctg7180001505872_587_SAG	10002342	A	G	0.484059	0.0025	-0.00925278	0.00402789	0.941237	-0.0605608	0.0263631
1	ctg7180001505872_251_SGT	10002678	T	G	0.0896471	0.13	0.0108417	0.00705139	1.07215	0.069662	0.0453078
1	ctg7180001830304_248_SAG	10004528	G	A	0.484059	0.0025	-0.00925278	0.00402789	0.941237	-0.0605608	0.0263631
1	ctg7180001830304_1808_SAC	10006088	C	A	0.48379	0.0024	-0.00932739	0.00402904	0.940776	-0.0610504	0.0263712
1	ctg7180001758587_94_SAC	10007519	A	C	0.43019	0.0036	-0.0131412	0.00587057	0.917311	-0.0863091	0.0385569
1	ctg7180001758587_428_SCT	10007853	C	T	0.492701	0.0012	-0.0102703	0.0041037	0.935003	-0.0672055	0.0268533
1	ctg7180001758587_751_SAG	10008176	A	G	0.493194	0.00089	-0.0105433	0.00409583	0.933334	-0.0689924	0.026802
1	ctg7180001758587_1671_SGT	10009096	T	G	0.188519	0.23	-0.00474166	0.00515294	0.969285	-0.031197	0.033903
1	ctg7180001270902_2016_SAC	10010953	C	A	0.430503	0.005	-0.0126911	0.00587452	0.920041	-0.0833374	0.0385756
1	ctg7180001501762_426_SCT	10013587	C	T	0.475237	0.0018	-0.00966235	0.00408907	0.938693	-0.063267	0.0267743
1	ctg7180001191350_627_SCT	10016990	T	C	0.095961	0.082	0.0119953	0.00705852	1.08	0.0769587	0.0452856
1	ctg7180001191350_3535_SAG	10019898	A	G	0.428578	0.031	0.005636	0.00408011	1.03748	0.0367988	0.02664
1	ctg7180001191350_4685_SCT	10021048	T	C	0.42822	0.0033	-0.013243	0.00590469	0.916686	-0.0869904	0.0387866
1	ctg7180001191350_4726_SCT	10021089	C	T	0.483611	0.0016	-0.00974322	0.00403235	0.938215	-0.0637761	0.0263945
1	ctg7180001191350_5617_SAG	10021980	G	A	0.417114	0.0077	0.00742317	0.00408368	1.04962	0.0484298	0.0266425
1	ctg7180001935532_3092_SCT	10025497	T	C	0.483566	0.0016	-0.00972732	0.00403218	0.938313	-0.063672	0.0263934
1	ctg7180001842406_2290_SAC	10037417	A	C	0.0883486	0.082	0.0116965	0.00710699	1.07794	0.0750494	0.0456013
1	ctg7180001218442_846_SAT	10056847	T	A	0.0883486	0.082	0.0116965	0.00710699	1.07794	0.0750494	0.0456013
1	ctg7180001370193_659_SAC	10068222	A	C	0.0111947	0.45	-0.0103996	0.0191642	0.932887	-0.0694716	0.128021
1	ctg7180001430553_1283_SGT	10071276	T	G	0.305391	0.00051	0.0102033	0.00436937	1.06845	0.0662102	0.0283533
1	ctg7180001546395_632_SAG	10121890	A	G	0.0111947	0.45	-0.0103996	0.0191642	0.932887	-0.0694716	0.128021
1	ctg7180001230445_1900_SCT	10145142	C	T	0.333557	0.32	0.00440551	0.00427103	1.02914	0.0287247	0.0278479
1	ctg7180001303980_959_SAG	10154597	A	G	0.333557	0.32	0.00440551	0.00427103	1.02914	0.0287247	0.0278479
1	ctg7180001303980_930_SCT	10154626	T	C	0.333557	0.32	0.00440551	0.00427103	1.02914	0.0287247	0.0278479
1	ctg7180001303980_861_SAG	10154695	A	G	0.222954	0.037	0.00591071	0.00485797	1.03915	0.0383999	0.0315606
1	ctg7180001303980_855_SAG	10154701	G	A	0.331856	0.33	0.00440006	0.00428999	1.0291	0.0286884	0.0279708
1	ctg7180001892358_5389_SGT	10159089	G	T	0.334184	0.26	0.00479633	0.00426903	1.03176	0.0312655	0.0278282
1	ctg7180001869655_1695_SCT	10179136	C	T	0.273912	0.33	0.00488008	0.00453376	1.03228	0.0317717	0.029517
1	ctg7180001869655_2114_SAG	10179555	A	G	0.347349	0.46	-7.1193e-05	0.00604174	0.999535	-0.000465567	0.03951
1	ctg7180001869655_5665_SCT	10183106	T	C	0.0111499	0.32	-0.0139629	0.0191828	0.910294	-0.0939878	0.129124
1	ctg7180001631353_1495_SGT	10188855	G	T	0.0117768	0.74	-0.00567241	0.0186701	0.963174	-0.0375209	0.123496
1	ctg7180001818115_8143_SAG	10220104	G	A	0.023688	0.35	0.0100746	0.013238	1.06677	0.064639	0.0849355
1	ctg7180001816055_4110_SAG	10222384	A	G	0.0182697	0.48	-0.00590087	0.0150248	0.961708	-0.0390442	0.0994145
1	ctg7180001816055_4061_SCT	10222433	C	T	0.0575407	0.0021	0.0250169	0.00864254	1.16982	0.156851	0.0541872
1	ctg7180001600531_3046_SAG	10253804	A	G	0.0188967	0.85	-0.000975768	0.0147782	0.993627	-0.00639301	0.0968234
1	ctg7180001714293_96_SCT	10257147	T	C	0.1518	0.05	-0.00802962	0.00560771	0.948261	-0.053125	0.0371013
1	ctg7180001846132_3302_SCT	10261590	T	C	0.436235	0.6	-0.00158971	0.00405753	0.989654	-0.0103998	0.0265443
1	ctg7180001846132_1842_SAG	10263050	G	A	0.216729	0.046	0.00535374	0.00488378	1.03541	0.0347978	0.0317432
1	ctg7180001905517_5374_SCT	10272648	T	C	0.111768	0.75	-0.00171481	0.0063863	0.988819	-0.0112441	0.0418754
1	ctg7180001905517_2239_SAG	10275783	A	G	0.13971	0.024	-0.0106555	0.0058041	0.931634	-0.0708156	0.0385736
1	ctg7180001888349_3677_SGT	10283891	T	G	0.116246	0.19	-0.00661065	0.00627793	0.957254	-0.043687	0.0414882
1	ctg7180001888349_5382_SAG	10285597	G	A	0.472058	0.99	-0.00150249	0.00403106	0.990221	-0.00982687	0.0263647
1	ctg7180001888349_6197_SGT	10286412	G	T	0.460371	0.99	-0.00141757	0.00403728	0.990771	-0.00927199	0.0264069
1	ctg7180001888349_6273_SAC	10286488	C	A	0.471431	0.89	-0.00185491	0.00403135	0.987941	-0.0121324	0.0263679
1	ctg7180001888349_9403_SCT	10289618	T	C	0.460371	0.99	-0.00141757	0.00403728	0.990771	-0.00927199	0.0264069
1	ctg7180001888349_10456_SCT	10290671	T	C	0.471431	0.89	-0.00185491	0.00403135	0.987941	-0.0121324	0.0263679
1	ctg7180001888349_11714_SAC	10291929	C	A	0.0116873	0.94	-0.00192979	0.0187408	0.987412	-0.0126681	0.123024
1	ctg7180001920704_133_SCT	10298338	T	C	0.152606	0.37	0.00445689	0.00823632	1.02939	0.0289639	0.0535252
1	ctg7180001920704_4830_SCT	10303422	C	T	0.329438	0.31	-0.00622368	0.00646882	0.959944	-0.0408805	0.0424907
1	ctg7180001920704_12130_SAC	10310722	A	C	0.111902	0.74	-0.00178498	0.00638367	0.988363	-0.0117055	0.0418629
1	ctg7180001589454_906_SAG	10317220	G	A	0.248522	0.058	-0.00703491	0.00465674	0.954712	-0.0463451	0.030678
1	ctg7180001236349_5747_SGT	10327014	T	G	0.106484	0.26	-0.00541033	0.00652346	0.964937	-0.0356927	0.0430362
1	ctg7180001798644_3593_SCT	10355771	T	C	0.146561	0.22	-0.00716974	0.00838259	0.953723	-0.0473825	0.0553979
1	ctg7180001798644_3849_SCT	10356027	T	C	0.2307	0.14	0.00379162	0.00480128	1.025	0.0246927	0.0312681
1	ctg7180001912186_3325_SAG	10365411	G	A	0.146382	0.25	-0.0066278	0.00839836	0.957178	-0.0437655	0.0554571
1	ctg7180001612893_1754_SAG	10371115	A	G	0.389217	0.11	0.00644375	0.00412853	1.04292	0.042021	0.026923
1	ctg7180001612893_561_SAG	10372308	A	G	0.112216	0.81	-0.00126893	0.00637945	0.99172	-0.00831453	0.0418007
1	ctg7180001788141_2063_SCT	10441003	T	C	0.196176	0.33	0.0014095	0.00729081	1.00924	0.00920104	0.0475935
1	ctg7180001788141_1584_SAG	10441482	A	G	0.11638	0.21	-0.00661572	0.00627684	0.957221	-0.0437207	0.0414811
1	ctg7180001857403_10926_SAG	10472167	A	G	0.11638	0.21	-0.00661572	0.00627684	0.957221	-0.0437207	0.0414811
1	ctg7180001857403_10896_SAC	10472197	A	C	0.353842	0.89	-0.000965976	0.00420821	0.9937	-0.00632038	0.0275343
1	ctg7180001308996_901_SAG	10484470	G	A	0.123007	0.11	-0.00757323	0.00612834	0.951119	-0.0501164	0.0405547
1	ctg7180001590783_9246_SGT	10517914	G	T	0.353842	0.89	-0.000965976	0.00420821	0.9937	-0.00632038	0.0275343
1	ctg7180001590783_2545_SCT	10524198	T	C	0.146427	0.11	-0.00734941	0.00569372	0.952578	-0.0485833	0.0376383
1	ctg7180001590783_2261_SAC	10524481	A	C	0.410532	0.018	0.0137402	0.00591633	1.09359	0.0894619	0.038521
1	ctg7180001824807_1010_SCT	10547994	C	T	0.112126	0.77	-0.00151161	0.00637738	0.99014	-0.0099085	0.0418033
1	ctg7180001720690_780_SAG	10551358	A	G	0.145934	0.069	-0.00806547	0.00570015	0.948024	-0.0533755	0.0377223
1	ctg7180001720690_1448_SGT	10552026	T	G	0.111499	0.61	-0.00240477	0.00639302	0.984338	-0.0157857	0.041966
1	ctg7180001886849_1310_SCT	10573018	T	C	0.230253	0.22	0.0028547	0.00477963	1.01878	0.0186096	0.0311582
1	ctg7180001568725_469_SGT	10606924	T	G	0.377799	0.078	0.00698058	0.00415085	1.04655	0.0454973	0.027054
1	ctg7180001849042_21448_SCT	10628465	T	C	0.111499	0.61	-0.00240477	0.00639302	0.984338	-0.0157857	0.041966
1	ctg7180001849042_16839_SCT	10633074	T	C	0.240865	0.33	0.00199976	0.00470888	1.01314	0.0130495	0.0307279
1	ctg7180001849042_16822_SAC	10633091	C	A	0.351603	0.52	0.000790776	0.00421968	1.00518	0.0051686	0.0275803
1	ctg7180001849042_16002_SCT	10633911	C	T	0.344662	0.6	0.000471986	0.00612575	1.00309	0.0030855	0.0400457
1	ctg7180001849042_12313_SAC	10637596	C	A	0.0174637	0.91	-0.0127337	0.0214683	0.918091	-0.0854588	0.144079
1	ctg7180001849042_12035_SAG	10637874	A	G	0.344662	0.6	0.000471986	0.00612575	1.00309	0.0030855	0.0400457
1	ctg7180001849042_7563_SAG	10642346	A	G	0.348872	0.61	0.000450589	0.00426004	1.00295	0.00294568	0.0278496
1	ctg7180001849042_1757_SAG	10648152	A	G	0.345379	0.55	0.000868664	0.00613089	1.00569	0.00567729	0.0400694
1	ctg7180001849042_1531_SAG	10648378	G	A	0.353752	0.66	0.000111316	0.00421837	1.00073	0.000727871	0.027583
1	ctg7180001849042_1227_SCT	10648682	T	C	0.353215	0.6	0.000284341	0.00422233	1.00186	0.00185905	0.027606
1	ctg7180001849042_823_SAG	10649086	G	A	0.49991	0.44	-0.00372846	0.00403235	0.975912	-0.0243824	0.0263698
1	ctg7180001799497_1963_SCT	10667228	T	C	0.0165234	0.044	-0.0216448	0.0163462	0.862332	-0.148115	0.111857
1	ctg7180001799497_1767_SAG	10667424	A	G	0.0153591	0.31	-0.012328	0.0167774	0.920651	-0.0826742	0.112513
1	ctg7180001367178_1794_SCT	10671844	T	C	0.218655	0.039	0.00584294	0.00488135	1.03869	0.0379586	0.0317116
1	ctg7180001367178_1524_SAC	10672114	C	A	0.0613917	0.00051	0.0273704	0.00856239	1.18655	0.17105	0.0535102
1	ctg7180001310655_233_SAG	10674779	A	G	0.401531	0.93	-0.00126242	0.00596417	0.991775	-0.00825947	0.039021
1	ctg7180001310655_772_SCT	10675318	C	T	0.0160756	0.071	-0.0191753	0.0160336	0.877653	-0.130504	0.109122
1	ctg7180001310655_781_SAG	10675327	G	A	0.346543	0.35	0.00199486	0.00422869	1.01311	0.0130288	0.0276183
1	ctg7180001310655_970_SGT	10675516	G	T	0.122649	0.47	-0.00337759	0.00613731	0.978042	-0.022203	0.0403444
1	ctg7180001716762_292_SGT	10677499	T	G	0.0167025	0.21	-0.0130997	0.0157336	0.915773	-0.0879869	0.105678
1	ctg7180001716762_2355_SCT	10679562	T	C	0.0108365	0.19	-0.0199327	0.0194761	0.87289	-0.135946	0.132832
1	ctg7180001716762_2731_SCT	10679938	T	C	0.34717	0.29	0.00238037	0.00422689	1.01566	0.015543	0.0276002
1	ctg7180001535393_639_SGT	10681064	G	T	0.342334	0.47	0.00129575	0.00424097	1.0085	0.00846619	0.0277097
1	ctg7180001822669_3575_SCT	10693184	T	C	0.229088	0.086	0.00489024	0.00478814	1.03232	0.0318093	0.0311452
1	ctg7180001860630_311_SAG	10718208	A	G	0.0168816	0.5	0.0135813	0.0221598	1.09041	0.0865524	0.141222
1	ctg7180001704037_805_SAG	10736228	A	G	0.119112	0.26	-0.00476507	0.00621203	0.969093	-0.0313946	0.0409278
1	ctg7180001693596_2187_SGT	10739851	G	T	0.338528	0.26	0.00288074	0.00425224	1.01898	0.0188027	0.0277545
1	ctg7180001394569_527_SCG	10784665	C	G	0.224655	0.035	0.00609652	0.00482162	1.0404	0.0396008	0.0313195
1	ctg7180001897709_8250_SCT	10812256	C	T	0.331318	0.25	0.00250761	0.00427524	1.0165	0.01637	0.0279092
1	ctg7180001859545_8653_SGT	10866745	T	G	0.0241358	0.14	0.0183798	0.0138191	1.1232	0.116184	0.0873544
1	ctg7180001859545_7517_SAC	10867881	C	A	0.489925	0.27	-0.00556577	0.00595449	0.964247	-0.0364081	0.0389509
1	ctg7180001812262_1876_SAT	10878764	A	T	0.339871	0.18	0.00360721	0.00425069	1.02381	0.023534	0.0277322
1	ctg7180001812262_1530_SCT	10879110	C	T	0.107335	0.38	-0.00430462	0.00650141	0.972052	-0.028346	0.0428118
1	ctg7180001884781_695_SGT	10890332	T	G	0.330557	0.32	0.00209151	0.00427794	1.01375	0.0136573	0.0279345
1	ctg7180001884781_13217_SCG	10902373	C	G	0.106708	0.3	-0.00489887	0.00651819	0.968225	-0.0322911	0.0429649
1	ctg7180001884781_13354_SAT	10902510	A	T	0.33611	0.38	0.00187192	0.00426144	1.0123	0.0122258	0.027832
1	ctg7180001884781_15177_SCG	10904333	G	C	0.460595	0.7	0.000522744	0.0040395	1.00342	0.00341805	0.026413
1	ctg7180001884781_18973_SCT	10908129	C	T	0.339423	0.23	0.00315234	0.00425248	1.02079	0.0205721	0.0277516
1	ctg7180001832459_1569_SAG	10910987	A	G	0.0130306	0.24	-0.0176383	0.0186952	0.887216	-0.119667	0.126837
1	ctg7180001254513_666_SCT	10912094	T	C	0.301451	0.65	-0.0019071	0.00618769	0.987587	-0.0124904	0.0405257
1	ctg7180001254513_6202_SGT	10917630	G	T	0.335035	0.16	0.00368698	0.004273	1.02434	0.0240515	0.0278743
1	ctg7180001754636_3322_SAC	10923871	A	C	0.0139262	0.56	0.01932	0.0172133	1.12956	0.121832	0.108547
1	ctg7180001754636_1418_SAG	10925775	A	G	0.445907	0.9	-0.000940649	0.00404853	0.993866	-0.0061524	0.0264798
1	ctg7180001222711_7763_SAT	10933345	A	T	0.445325	0.97	-0.00116795	0.00404923	0.99239	-0.0076395	0.0264858
1	ctg7180001827703_5928_SCT	10952922	T	C	0.456699	0.98	-0.000731525	0.00404012	0.995227	-0.00478423	0.0264227
1	ctg7180001827703_8453_SAG	10955447	A	G	0.260881	0.33	-0.00309841	0.00458293	0.979882	-0.0203232	0.0300606
1	ctg7180001827703_21001_SAG	10967995	A	G	0.373366	0.16	-0.00392001	0.00416083	0.97464	-0.0256872	0.0272652
1	ctg7180001827703_21173_SCG	10968167	G	C	0.261329	0.41	-0.00261941	0.00458039	0.982974	-0.0171731	0.0300294
1	ctg7180001827703_22013_SAG	10969007	A	G	0.373366	0.16	-0.00392001	0.00416083	0.97464	-0.0256872	0.0272652
1	ctg7180001827703_22068_SAT	10969062	A	T	0.373366	0.16	-0.00392001	0.00416083	0.97464	-0.0256872	0.0272652
1	ctg7180001827703_22104_SGT	10969098	T	G	0.373186	0.17	-0.00380607	0.00416203	0.975369	-0.0249391	0.0272715
1	ctg7180001795725_10785_SAT	10971573	T	A	0.140247	0.015	-0.0119878	0.00580665	0.923268	-0.0798354	0.0386707
1	ctg7180001795725_9952_SAG	10972406	A	G	0.432205	0.61	-0.000956397	0.00587989	0.993764	-0.00625576	0.0384602
1	ctg7180001795725_6003_SAG	10976355	A	G	0.286853	0.56	-0.00160208	0.00625725	0.989564	-0.010491	0.0409749
1	ctg7180001890049_4590_SAC	10987331	C	A	0.228282	0.59	0.00204461	0.00690908	1.01343	0.0133401	0.0450786
1	ctg7180001890049_5045_SAC	10987786	A	C	0.259762	0.31	-0.00333843	0.00460301	0.978335	-0.0219032	0.0302
1	ctg7180001890049_14168_SAT	10996909	A	T	0.0322855	0.024	0.0219897	0.0113962	1.14824	0.138231	0.0716385
1	ctg7180001890049_14599_SCG	10997340	G	C	0.106394	0.39	-0.00398784	0.00652587	0.974095	-0.0262467	0.0429512
1	ctg7180001890049_16225_SCT	10998966	T	C	0.330647	0.26	0.00259241	0.00427808	1.01707	0.0169225	0.027926
1	ctg7180001890049_16487_SCT	10999228	C	T	0.123231	0.32	-0.00420205	0.00612164	0.972721	-0.0276583	0.0402932
1	ctg7180001890049_17098_SAG	10999839	A	G	0.123813	0.4	-0.0036539	0.00610989	0.976257	-0.0240294	0.0401809
1	ctg7180001890049_17919_SGT	11000660	T	G	0.330244	0.29	0.00232398	0.00427875	1.01529	0.0151729	0.0279353
1	ctg7180001890049_18603_SAG	11001344	G	A	0.124306	0.4	-0.00354742	0.00610514	0.976945	-0.0233251	0.0401426
1	ctg7180001890049_18871_SCG	11001612	C	G	0.250493	0.6	-0.00150391	0.00464504	0.990199	-0.00984953	0.0304217
1	ctg7180001890049_19013_SAG	11001754	A	G	0.123813	0.4	-0.0036539	0.00610989	0.976257	-0.0240294	0.0401809
1	ctg7180001215293_1199_SCT	11005306	C	T	0.330691	0.24	0.00267313	0.00427815	1.0176	0.0174484	0.027925
1	ctg7180001890050_2819_SCT	11011447	C	T	0.123813	0.4	-0.0036539	0.00610989	0.976257	-0.0240294	0.0401809
1	ctg7180001244672_2180_SGT	11026222	T	G	0.331229	0.23	0.00274829	0.0042764	1.0181	0.0179382	0.0279123
1	ctg7180001244672_1607_SAG	11026795	A	G	0.160039	0.97	0.000203391	0.00786427	1.00133	0.00132964	0.0514117
[truncated: 510,399+ more rows]

## Sheet: Table S4
Table S4. Estimated heritabilities from GCTA using the 50k array dataset. Estimates are given on the observed quantitative scale and when transformed on the liability scale assuming population prevalences of 1%, 2.5% and 5%.
	50k dataset
quantitative scale
	0.61
liability scale
prevelence of 0.01	0.54
prevelence of 0.025	0.69
prevelence of 0.05	0.84
